# Supplementary material for: High-valent nonheme Fe(iv)O/Ru(iv)O complexes catalyze C–H activation reactivity and hydrogen tunneling: a comparative DFT investigation
Source: Royal Society of Chemistry journal article supplement (doi:10.1039/d3dt03155a), 2023-12-29
Supplement: d3dt03155a1.pdf [file d3dt03155a1.pdf]

# High-Valent Nonheme Fe(IV)-Oxo/Ru(IV)-Oxo Complexes Catalyze C-H

## Activation Reactivity and Hydrogen Tunnelling: A Comparative DFT

### Investigation

Akanksha Katoch and Debasish Mandal\*

Department of Chemistry and Biochemistry, Thapar Institute of Engineering and Technology,

Patiala-147001, Punjab, India

Corresponding author: [debasish.mandal@thapar.edu](mailto:debasish.mandal@thapar.edu)

| S. No. | CONTENTS                                                                                                                                                                                                              | Page no.     |
|--------|-----------------------------------------------------------------------------------------------------------------------------------------------------------------------------------------------------------------------|--------------|
| 1      | <b>Table S1</b> The relative energies (in kcal mol <sup>-1</sup> ) for all the investigated reactions computed at different levels of theory.                                                                         | <b>S2-S3</b> |
| 2      | <b>Table S2</b> Calculated energy barriers and free energy barriers (kcal mol <sup>-1</sup> ) are given as B2+ZPE/B2+G <sup>corr</sup> <sub>298K</sub> level of theory.                                               | <b>S3</b>    |
| 2      | <b>Table S3</b> Calculated and experimental bond dissociation energy and enthalpy computed at B3LYP and CBS-QB3 method.                                                                                               | <b>S3</b>    |
| 3      | <b>Table S4</b> Calculated free space for oxidants.                                                                                                                                                                   | <b>S3-S4</b> |
| 4      | <b>Table S5</b> Kinetic Isotope Effect (KIE) at 298K computed using different methods.                                                                                                                                | <b>S4</b>    |
| 5      | <b>Fig. S1</b> Optimized geometries of (a) <sup>3</sup> TS <sub>O</sub> (b) <sup>5</sup> TS <sub>O</sub> with key geometrical parameters computed at B1 level of theory (distances are in Å and angles are in degree) | <b>S4</b>    |
| 5      | <b>Fig. S2</b> Spin natural orbitals and their occupations for the oxidant of the complex 1.                                                                                                                          | <b>S5</b>    |
| 6      | <b>Fig. S3</b> Spin natural orbitals and their occupations for the transition states of the reaction between complex 1 and BA.                                                                                        | <b>S5</b>    |
| 7      | <b>Fig. S4</b> Spin natural orbitals and their occupations for the transition states of the reaction between complex 1 and EB.                                                                                        | <b>S5</b>    |
| 8      | <b>Fig. S5</b> Spin natural orbitals and their occupations for the oxidants of the complex 1'. Upper panel represents <sup>3</sup> R while bottom panel represents <sup>5</sup> R.                                    | <b>S6</b>    |
| 9      | <b>Fig. S6</b> Spin natural orbitals and their occupations for the transition states of the reaction between complex 1' and BA. Upper panel represents <sup>3</sup> R while bottom panel represents <sup>5</sup> R.   | <b>S6</b>    |
| 10     | <b>Fig. S7</b> Spin natural orbitals and their occupations for the transition states of the reaction between complex 1' and EB. Upper panel represents <sup>3</sup> R while bottom panel represents <sup>5</sup> R.   | <b>S7</b>    |
| 11     | <b>Fig. S8</b> Spin natural orbitals and their occupations for the oxidant of the complex 2.                                                                                                                          | <b>S7</b>    |

|    |                                                                                                                                                                                                                           |                |
|----|---------------------------------------------------------------------------------------------------------------------------------------------------------------------------------------------------------------------------|----------------|
| 12 | <b>Fig. S9</b> Spin natural orbitals and their occupations for the transition states of the reaction between complex 2 and EB.                                                                                            | <b>S7</b>      |
| 13 | <b>Fig. S10</b> Spin natural orbitals and their occupations for the transition states of the reaction between complex 2 and DHA.                                                                                          | <b>S8</b>      |
| 14 | <b>Fig. S11</b> Spin natural orbitals and their occupations for the oxidants of the complex 2'. Upper panel represents <sup>3</sup> R while bottom panel represents <sup>5</sup> R.                                       | <b>S8</b>      |
| 15 | <b>Fig. S12</b> Spin natural orbitals and their occupations for the transition states of the reaction between the complex 2' and EB. Upper panel represents <sup>3</sup> R while bottom panel represents <sup>5</sup> R.  | <b>S8</b>      |
| 16 | <b>Fig. S13</b> Spin natural orbitals and their occupations for the transition states of the reaction between the complex 2' and DHA. Upper panel represents <sup>3</sup> R while bottom panel represents <sup>5</sup> R. | <b>S9</b>      |
| 17 | <b>Table S6</b> Mulliken spin densities and charges for oxidants.                                                                                                                                                         | <b>S9</b>      |
| 18 | <b>Table S7</b> Mulliken spin densities and charges of stationary points along S=1 and S=2.                                                                                                                               | <b>S9-S10</b>  |
| 19 | Cartesian coordinates and thermochemistry data of all the stationary points computed at B1 Level of Theory                                                                                                                | <b>S10-S34</b> |

**Table S1** The relative energies and free energies at 298K (kcal mol<sup>-1</sup>) for all the species involved in the investigated reactions computed at different level of theory.

| Reactions | Spin state | Species          | B1+ZPE | B2+ZPE | B2+ G <sup>corr</sup> |
|-----------|------------|------------------|--------|--------|-----------------------|
| 1+BA      | S=1        | <sup>3</sup> R+S | 0.0    | 0.0    | 0.0                   |
|           |            | <sup>3</sup> TS  | 13.0   | 12.5   | 23.6                  |
|           |            | <sup>3</sup> IH  | -0.3   | -5.7   | -5.6                  |
| 1'+BA     | S=1        | <sup>3</sup> R+S | 0.0    | 0.0    | 0.0                   |
|           |            | <sup>3</sup> TS  | 8.0    | 9.6    | 20.9                  |
|           |            | <sup>3</sup> IH  | -6.8   | -13.5  | -14.4                 |
|           | S=2        | <sup>5</sup> R+S | 5.7    | 4.4    | 3.1                   |
|           |            | <sup>5</sup> TS  | 11.6   | 9.1    | 18.9                  |
|           |            | <sup>5</sup> IH  | -2.8   | -14.9  | -17.3                 |
| 1+EB      | S=1        | <sup>3</sup> R+S | 0.0    | 0.0    | 0.0                   |
|           |            | <sup>3</sup> TS  | 16.3   | 16.1   | 28.5                  |
|           |            | <sup>3</sup> IH  | 6.5    | 0.2    | -0.6                  |
| 1'+EB     | S=1        | <sup>3</sup> R+S | 0.0    | 0.0    | 0.0                   |
|           |            | <sup>3</sup> TS  | 13.6   | 12.8   | 24.0                  |
|           |            | <sup>3</sup> IH  | -3.4   | -8.5   | -9.1                  |
|           | S=2        | <sup>5</sup> R+S | 5.7    | 4.4    | 3.1                   |
|           |            | <sup>5</sup> TS  | 15.1   | 11.3   | 21.2                  |
|           |            | <sup>5</sup> IH  | 3.1    | -9.5   | -12.4                 |

|        |     |                  |      |       |      |
|--------|-----|------------------|------|-------|------|
| 2+EB   | S=1 | <sup>3</sup> R+S | 0.0  | 0.0   | 0.0  |
|        |     | <sup>3</sup> TS  | 24.2 | 24.3  | 36.5 |
|        |     | <sup>3</sup> IH  | 3.4  | -1.9  | -4.0 |
| 2'+EB  | S=1 | <sup>3</sup> R+S | 0.0  | 0.0   | 0.0  |
|        |     | <sup>3</sup> TS  | 26.8 | 26.7  | 40.1 |
|        |     | <sup>3</sup> IH  | 4.7  | -0.7  | -1.1 |
|        | S=2 | <sup>5</sup> R+S | 1.3  | 3.5   | 4.6  |
|        |     | <sup>5</sup> TS  | 19.9 | 13.7  | 25.8 |
|        |     | <sup>5</sup> IH  | 3.08 | -5.0  | -5.3 |
| 2+DHA  | S=1 | <sup>3</sup> R+S | 0.0  | 0.0   | 0.0  |
|        |     | <sup>3</sup> TS  | 21.6 | 18.8  | 31.2 |
|        |     | <sup>3</sup> IH  | -0.3 | -4.2  | 5.1  |
| 2'+DHA | S=1 | <sup>3</sup> R+S | 0.0  | 0.0   | 0.0  |
|        |     | <sup>3</sup> TS  | 25.0 | 22.9  | 36.2 |
|        |     | <sup>3</sup> IH  | -0.4 | -5.8  | 4.5  |
|        | S=2 | <sup>5</sup> R+S | 1.3  | 3.5   | 4.6  |
|        |     | <sup>5</sup> TS  | 14.4 | 9.6   | 23.2 |
|        |     | <sup>5</sup> IH  | -1.9 | -13.3 | -4.6 |

Table S2 Calculated energy of activation and free energy of activation (kcal mol<sup>-1</sup>) are given as B2+ZPE/B2+G<sup>corr</sup><sub>298K</sub> level of theory.

| Complex | Aliphatic hydroxylation<br>$\Delta E/\Delta G^\ddagger$ | Aromatic hydroxylation<br>$\Delta E/\Delta G^\ddagger$ |
|---------|---------------------------------------------------------|--------------------------------------------------------|
| 1+EB    | 16.1/28.5                                               | 27.9/39.8                                              |
| 1'+EB   | 11.3/21.2                                               | 15.2/24.5                                              |

**Table S3** Calculated and experimental bond dissociation energy and enthalpy (kcal mol<sup>-1</sup>) computed at B3LYP/ and CBS-QB3 method.

| Substrate | B3LYP                   |                         | CBS-QB3                 |                         | Experiment |
|-----------|-------------------------|-------------------------|-------------------------|-------------------------|------------|
|           | $\Delta E_{\text{BDE}}$ | $\Delta H_{\text{BDE}}$ | $\Delta E_{\text{BDE}}$ | $\Delta H_{\text{BDE}}$ |            |
| BA        | 77.2                    | 78.6                    | 76.8                    | 78.1                    | 79.0*      |
| EB        | 83.1                    | 84.6                    | 82.6                    | 84.2                    | 85.4**     |

\* *J. Org. Chem.* **2005**, *70*, 9521-9528 \*\* *J. Org. Chem.* **2019**, *84*, 13549-13556

**Table S4** Calculated % Volume buried and %free space for oxidants computed on the geometry optimized at B1 level of theory

| Oxidants | Spin state | % Volume buried | % Free space |
|----------|------------|-----------------|--------------|
| 1        | S=1        | 89.6            | 10.4         |
| 1'       | S=2        | 89.1            | 10.9         |
| 2        | S=1        | 97.2            | 2.8          |
| 2'       | S=2        | 96.6            | 3.4          |

**Table S5** Kinetic Isotope Effect (KIE) at 298K computed using different methods.

| Reactions | Spin state | KIE <sub>Eyr</sub> | KIE <sub>Eck</sub> | KIE <sub>W</sub> |
|-----------|------------|--------------------|--------------------|------------------|
| 1+BA      | S=1        | 6.5                | 48.3(54.5)*        | 9.9              |
| 1'+BA     | S=1        | 5.9                | 16.4               | 8.3              |
|           | S=2        | 3.4                | 3.6                | 3.6              |
| 1+EB      | S=1        | 5.1                | 27.6               | 7.7              |
| 1'+EB     | S=1        | 5.1                | 30.4               | 7.5              |
|           | S=2        | 3.7                | 4.6                | 4.2              |
| 2+EB      | S=1        | 5.6                | 127.6              | 8.6              |
| 2'+EB     | S=1        | 5.6                | 31.1               | 8.8              |
|           | S=2        | 5.9                | 73.2               | 8.6              |
| 2+DHA     | S=1        | 6.5                | 253.8              | 9.9              |
| 2'+DHA    | S=1        | 6.2                | 658.1              | 9.7              |
|           | S=2        | 6.3                | 80.6 (58)*         | 9.5              |

\*Experimental value

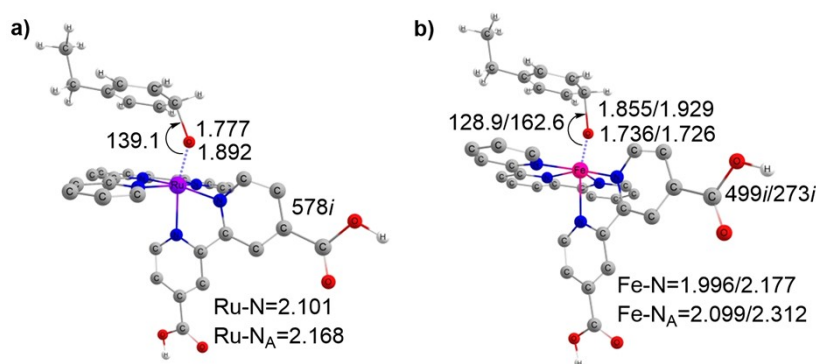

**Fig. S1** Optimized geometries of (a) <sup>3</sup>TS<sub>0</sub> (b) <sup>5</sup>TS<sub>0</sub> with key geometrical parameters computed at B1 level of theory (distances are in Å and angles are in degree).

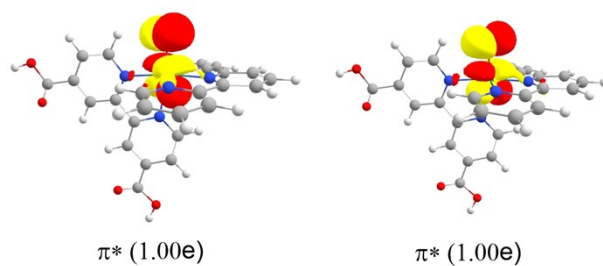

**Fig. S2** Spin natural orbitals and their occupations for the oxidant 1.

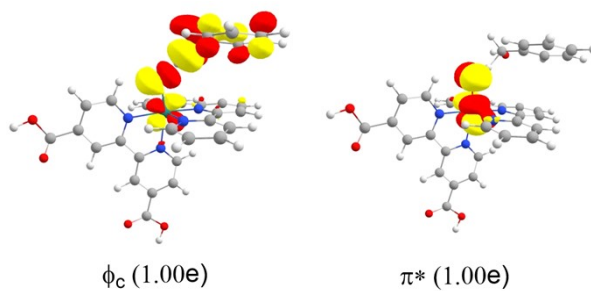

**Fig. S3** Spin natural orbitals and their occupations for the transition states of the reaction between complex 1 and BA.

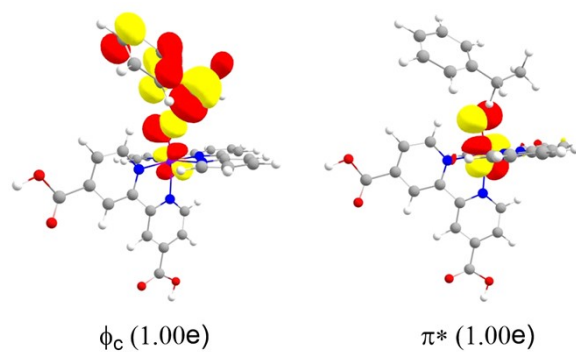

**Fig. S4** Spin natural orbitals and their occupations for the transition states of the reaction between complex 1 and EB.

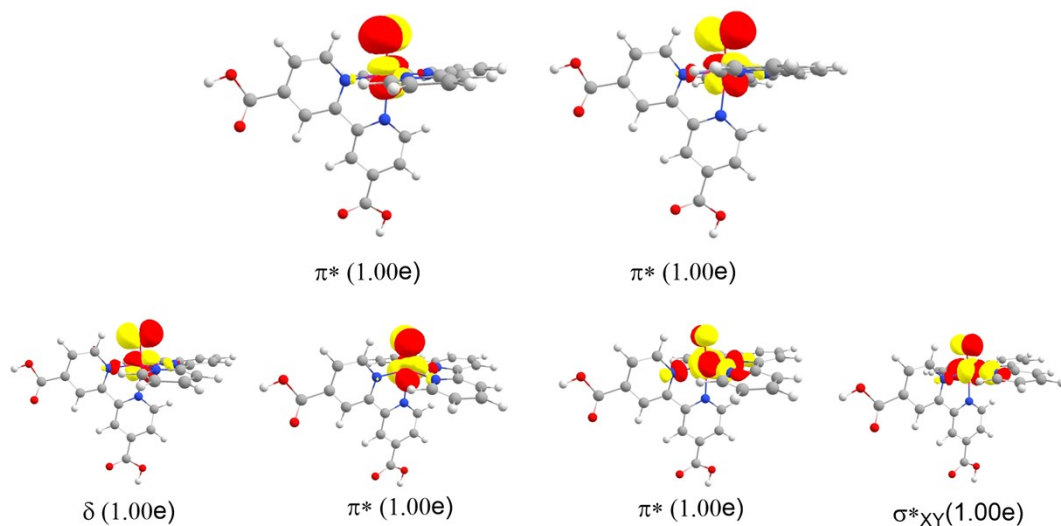

**Fig. S5** Spin natural orbitals and their occupations for the oxidants of the complex 1'. Upper panel represents  $^3R$  while bottom panel represents  $^5R$ .

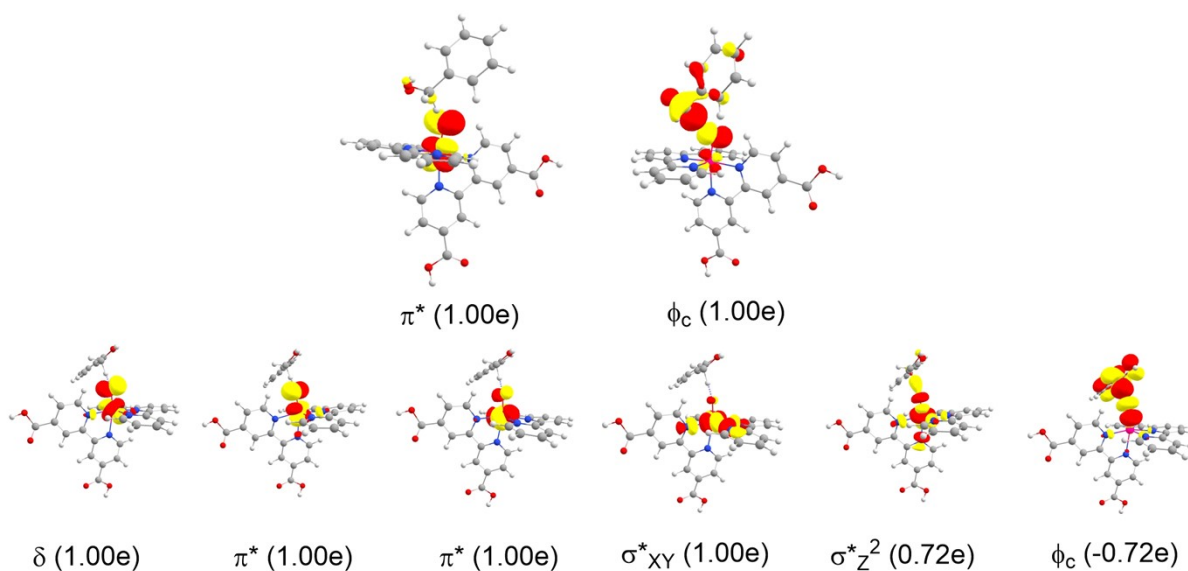

**Fig. S6** Spin natural orbitals and their occupations for the transition states of the reaction between complex 1' and BA. Upper panel represents  $^3R$  while bottom panel represents  $^5R$ .

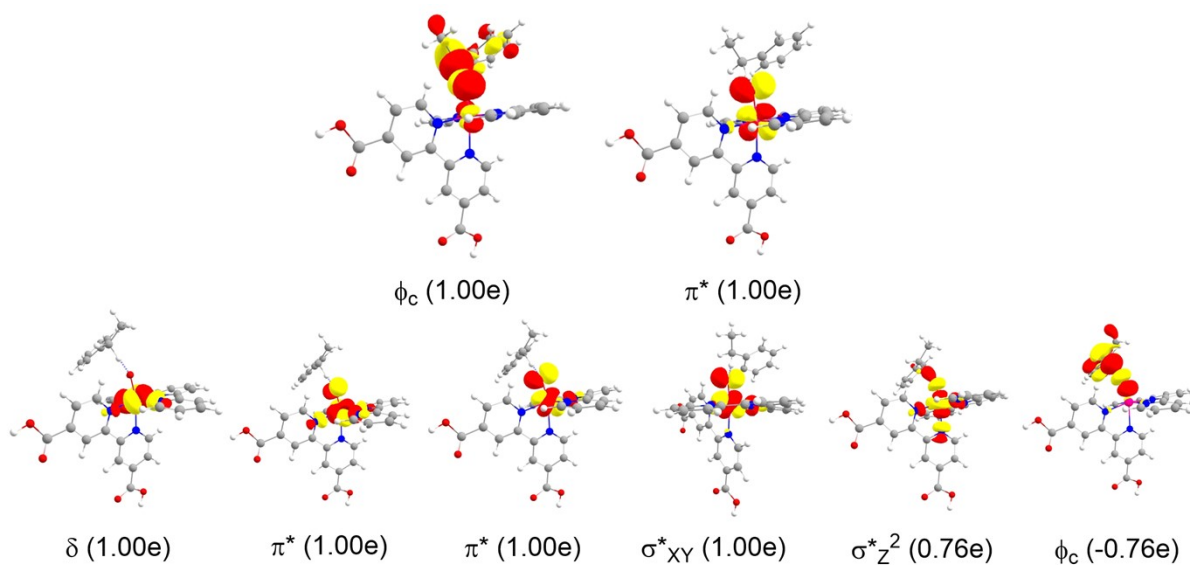

**Fig. S7** Spin natural orbitals and their occupations for the transition states of the reaction between the complex 1' and EB. Upper panel represents  $^3R$  while bottom panel represents  $^5R$ .

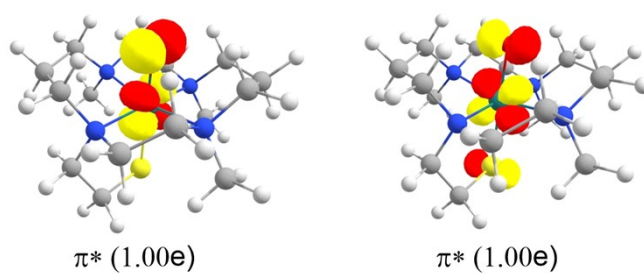

**Fig. S8** Spin natural orbitals and their occupations for the oxidant of the complex 2.

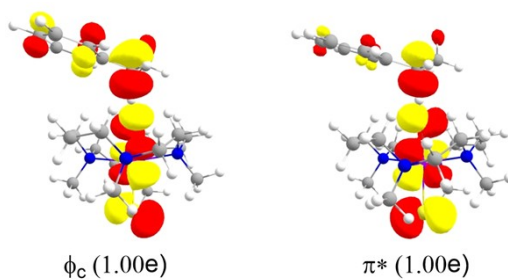

**Fig. S9** Spin natural orbitals and their occupations for the transition states of the reaction between complex 2 and EB.

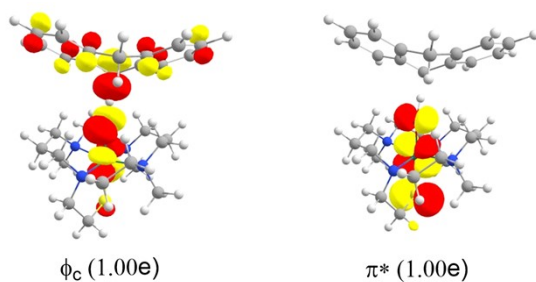

**Fig. S10** Spin natural orbitals and their occupations for the transition states of the reaction between complex 2 and DHA.

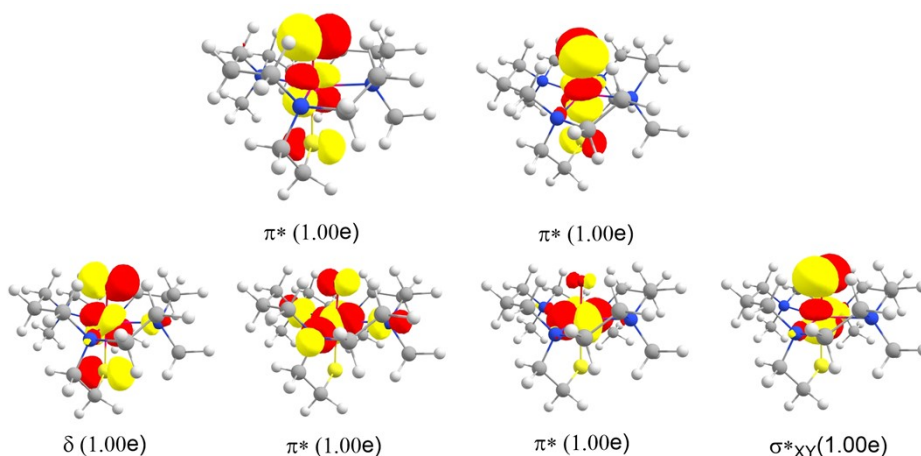

**Fig. S11** Spin natural orbitals and their occupations for the oxidants of the complex 2'. Upper panel represents  $^3R$  while bottom panel represents  $^5R$ .

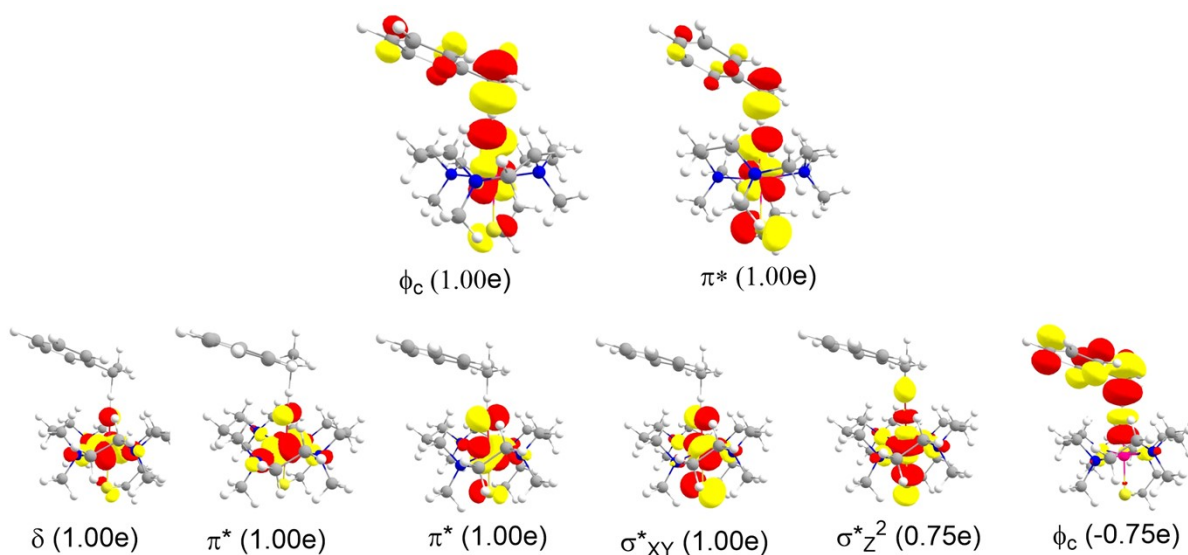

**Fig. S12** Spin natural orbitals and their occupations for the transition states of the reaction between the complex 2' and EB. Upper panel represents  $^3R$  while bottom panel represents  $^5R$ .



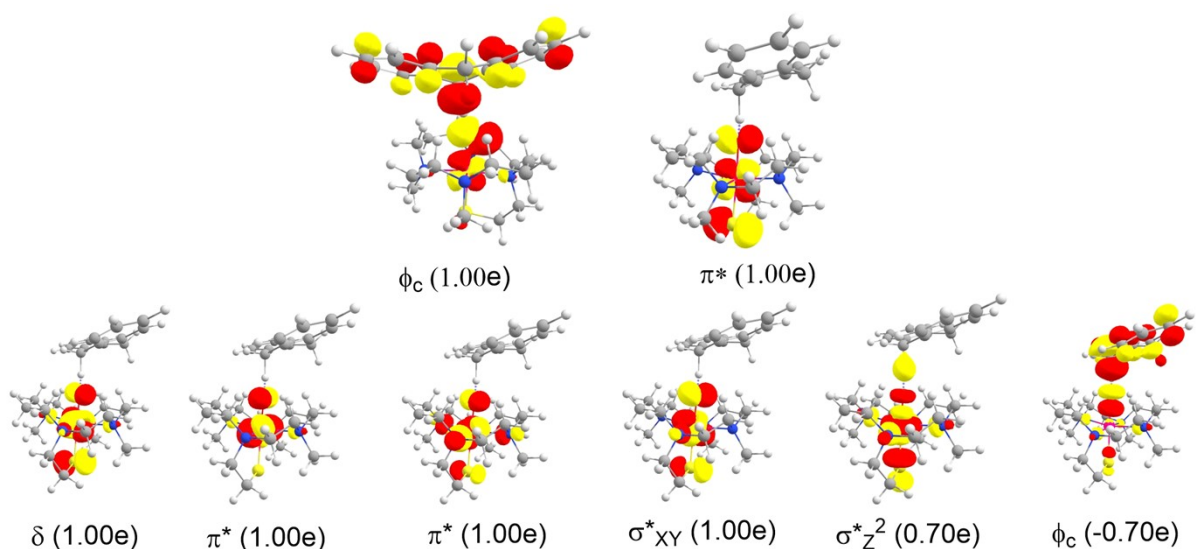

**Fig. S13** Spin natural orbitals and their occupations for the transition states of the reaction between the complex 2' and DHA. Upper panel represents  $^3R$  while bottom panel represents  $^5R$ .

**Table S6** Mulliken spin densities and charges for all the investigated oxidants

| Species | Spin State | Mulliken Spin Density |       |        | Mulliken Charges |        |        |
|---------|------------|-----------------------|-------|--------|------------------|--------|--------|
|         |            | Fe/Ru                 | O     | Rest   | Fe/Ru            | O      | Rest   |
| 1       | S=1        | 0.950                 | 1.015 | 0.035  | 1.037            | -0.467 | -0.57  |
|         | S=1        | 1.097                 | 0.948 | -0.045 | 0.591            | -0.381 | -0.21  |
| 1'      | S=1        | 2.941                 | 0.761 | 0.298  | 0.787            | -0.368 | -0.419 |
|         | S=2        | 1.012                 | 0.820 | 0.168  | 0.404            | -0.612 | 0.208  |
| 2       | S=1        | 1.312                 | 0.741 | -0.053 | 0.171            | -0.571 | 0.4    |
| 2'      | S=1        | 3.122                 | 0.685 | 0.193  | 0.272            | -0.582 | 0.31   |
|         | S=2        |                       |       |        |                  |        |        |

**Table S7** Mulliken spin densities and charges of stationary points along S=1 and S=2.

| Oxidant | Species | Mulliken Spin Density |       |        |        |       | Mulliken Charges |        |       |        |        |
|---------|---------|-----------------------|-------|--------|--------|-------|------------------|--------|-------|--------|--------|
|         |         | Fe/Ru                 | O     | H      | C      | Rest  | Fe/Ru            | O      | H     | C      | Rest   |
| 1+BA    | $^3TS$  | 0.746                 | 0.710 | -0.045 | 0.361  | 0.228 | 0.987            | -0.642 | 0.346 | -0.144 | -0.547 |
|         | $^3I$   | 0.812                 | 0.156 | -0.005 | 0.622  | 0.415 | 0.976            | -0.762 | 0.417 | -0.012 | -0.619 |
| 1'+BA   | $^3TS$  | 0.858                 | 0.717 | -0.043 | 0.332  | 0.136 | 0.574            | -0.542 | 0.323 | -0.149 | -0.206 |
|         | $^3I$   | 0.983                 | 0.080 | -0.004 | 0.579  | 0.362 | 0.564            | -0.739 | 0.421 | -0.002 | -0.244 |
|         | $^5TS$  | 3.702                 | 0.312 | -0.001 | -0.170 | 0.157 | 0.858            | -0.559 | 0.293 | -0.144 | -0.448 |
|         | $^5I$   | 2.814                 | 0.170 | 0.009  | 0.517  | 0.49  | 0.699            | -0.786 | 0.420 | 0.017  | -0.35  |
| 1+EB    | $^3TS$  | 0.696                 | 0.735 | -0.039 | 0.415  | 0.193 | 0.967            | -0.610 | 0.360 | -0.400 | -0.317 |

|        |                 |       |       |        |        |       |       |        |       |        |        |
|--------|-----------------|-------|-------|--------|--------|-------|-------|--------|-------|--------|--------|
|        | <sup>3</sup> I  | 0.699 | 0.305 | 0.000  | 0.732  | 0.264 | 0.944 | -0.711 | 0.428 | -0.245 | -0.416 |
| 1'+EB  | <sup>3</sup> TS | 0.848 | 0.715 | -0.049 | 0.412  | 0.074 | 0.567 | -0.538 | 0.339 | -0.396 | 0.028  |
|        | <sup>3</sup> I  | 0.835 | 0.220 | -0.006 | 0.738  | 0.213 | 0.538 | -0.686 | 0.473 | -0.192 | -0.133 |
|        | <sup>5</sup> TS | 3.754 | 0.288 | 0.006  | -0.255 | 0.207 | 0.865 | -0.577 | 0.328 | -0.402 | -0.214 |
|        | <sup>5</sup> I  | 4.002 | 0.413 | -0.014 | -0.659 | 0.258 | 0.876 | -0.759 | 0.438 | -0.261 | -0.294 |
| 2-EB   | <sup>3</sup> TS | 0.784 | 0.512 | -0.066 | 0.414  | 0.356 | 0.297 | -0.726 | 0.345 | -0.390 | 0.474  |
|        | <sup>3</sup> I  | 0.633 | 0.076 | -0.004 | 0.758  | 0.537 | 0.221 | -0.791 | 0.377 | -0.180 | 0.373  |
| 2'-EB  | <sup>3</sup> TS | 1.022 | 0.524 | -0.067 | 0.411  | 0.11  | 0.145 | -0.704 | 0.324 | -0.383 | 0.618  |
|        | <sup>3</sup> I  | 0.906 | 0.062 | -0.004 | 0.758  | 0.278 | 0.079 | -0.782 | 0.372 | -0.183 | 0.514  |
|        | <sup>5</sup> TS | 3.719 | 0.107 | 0.040  | -0.386 | 0.52  | 0.370 | -0.760 | 0.349 | -0.399 | 0.44   |
|        | <sup>5</sup> I  | 3.902 | 0.221 | 0.003  | -0.757 | 0.631 | 0.300 | -0.812 | 0.385 | -0.190 | 0.317  |
| 2-DHA  | <sup>3</sup> TS | 0.826 | 0.527 | -0.060 | 0.310  | 0.397 | 0.316 | -0.722 | 0.347 | -0.539 | 0.598  |
|        | <sup>3</sup> I  | 0.636 | 0.076 | -0.003 | 0.626  | 0.665 | 0.220 | -0.794 | 0.380 | -0.305 | 0.499  |
| 2'+DHA | <sup>3</sup> TS | 1.059 | 0.532 | -0.060 | 0.303  | 0.166 | 0.167 | -0.700 | 0.323 | -0.534 | 0.744  |
|        | <sup>3</sup> I  | 0.909 | 0.065 | -0.003 | 0.621  | 0.408 | 0.071 | -0.779 | 0.370 | -0.295 | 0.633  |
|        | <sup>5</sup> TS | 3.664 | 0.173 | 0.037  | -0.284 | 0.41  | 0.358 | -0.755 | 0.349 | -0.546 | 0.594  |
|        | <sup>5</sup> I  | 3.895 | 0.228 | 0.005  | -0.619 | 0.491 | 0.289 | -0.814 | 0.384 | -0.295 | 0.436  |

## Cartesian coordinates of all the stationary points and thermochemistry data computed at B1 Level of Theory

| Complex 1                                               |              |              |              | H | -1.640579000 | 2.855574000  | 2.399722000  |
|---------------------------------------------------------|--------------|--------------|--------------|---|--------------|--------------|--------------|
| Zero-point correction= 0.457518 (Hartree/Particle)      |              |              |              | C | 0.349614000  | 3.115688000  | 1.570994000  |
| Thermal correction to Energy= 0.500371                  |              |              |              | C | 0.677953000  | 4.420193000  | 2.229661000  |
| Thermal correction to Enthalpy= 0.501315                |              |              |              | O | -0.264963000 | 4.800735000  | 3.114885000  |
| Thermal correction to Gibbs Free Energy=0.374772        |              |              |              | O | 1.675872000  | 5.065120000  | 1.992245000  |
| Sum of electronic and zero-point Energies= -3305.138471 |              |              |              | H | 0.027074000  | 5.655774000  | 3.483671000  |
| Sum of electronic and thermal Energies= 3305.095618     |              |              |              | C | 5.385407000  | 1.151016000  | -2.366341000 |
| Sum of electronic and thermal Enthalpies= -3305.094674  |              |              |              | O | 6.183450000  | 0.304995000  | -3.050590000 |
| Sum of electronic and thermal Free Energies= -3305.2212 |              |              |              | O | 5.709253000  | 2.273639000  | -2.050586000 |
| Ru                                                      | -0.362291000 | -1.212247000 | -0.806819000 | H | 7.034691000  | 0.766534000  | -3.171839000 |
| N                                                       | 0.158604000  | -2.226876000 | 0.985851000  | C | -0.934841000 | -2.689319000 | 1.670150000  |
| N                                                       | -2.186548000 | -1.717654000 | -0.102528000 | C | 1.388846000  | -2.406524000 | 1.480312000  |
| N                                                       | -1.640287000 | -0.263869000 | -2.237460000 | C | -0.776731000 | -3.334550000 | 2.893023000  |
| N                                                       | 1.554551000  | -0.468087000 | -1.406317000 | C | 1.603789000  | -3.033382000 | 2.711554000  |
| N                                                       | -0.155191000 | 0.715596000  | 0.276548000  | H | 2.226193000  | -2.045195000 | 0.891807000  |
| O                                                       | -0.188720000 | -2.678141000 | -1.814811000 | H | -1.643843000 | -3.691716000 | 3.436869000  |
| C                                                       | 2.362587000  | -1.135784000 | -2.250030000 | H | 2.621825000  | -3.110615000 | 3.078536000  |
| C                                                       | 1.966270000  | 0.705761000  | -0.861164000 | C | -3.268112000 | -1.350367000 | -0.819401000 |
| C                                                       | 3.617803000  | -0.662019000 | -2.604144000 | C | -2.248449000 | -2.439291000 | 1.035410000  |
| H                                                       | 1.970126000  | -2.073966000 | -2.626088000 | C | -4.531965000 | -1.776144000 | -0.408489000 |
| C                                                       | 3.211664000  | 1.240817000  | -1.191622000 | C | -3.495439000 | -2.869302000 | 1.493392000  |
| H                                                       | 4.250529000  | -1.235657000 | -3.269689000 | H | -5.421571000 | -1.481042000 | -0.944864000 |
| H                                                       | 3.567327000  | 2.164996000  | -0.756266000 | H | -3.583830000 | -3.447984000 | 2.405070000  |
| C                                                       | 4.047782000  | 0.551382000  | -2.063756000 | C | -2.963195000 | -0.491587000 | -1.987033000 |
| C                                                       | 1.026226000  | 1.356573000  | 0.072938000  | C | -1.282823000 | 0.514231000  | -3.267660000 |
| C                                                       | -1.073829000 | 1.249180000  | 1.097211000  | C | -3.949294000 | 0.096402000  | -2.778727000 |
| C                                                       | 1.303715000  | 2.560192000  | 0.716868000  | C | -2.219314000 | 1.109159000  | -4.107661000 |
| C                                                       | -0.861902000 | 2.453789000  | 1.763643000  | H | -0.217311000 | 0.654641000  | -3.410063000 |
| H                                                       | -2.016415000 | 0.727200000  | 1.216087000  | H | -4.992649000 | -0.018867000 | -2.516166000 |
| H                                                       | 2.246582000  | 3.074428000  | 0.585074000  | H | -1.885797000 | 1.733105000  | -4.929592000 |
|                                                         |              |              |              | C | -3.572640000 | 0.901385000  | -3.850302000 |
|                                                         |              |              |              | C | -4.630575000 | -2.538083000 | 0.755369000  |

|    |              |              |              |
|----|--------------|--------------|--------------|
| C  | 0.506744000  | -3.500452000 | 3.423671000  |
| H  | -4.331900000 | 1.375573000  | -4.463894000 |
| H  | -5.607945000 | -2.858251000 | 1.100672000  |
| H  | 0.635077000  | -3.986618000 | 4.385959000  |
| Cl | -4.753823000 | 1.618293000  | 0.582059000  |
| Cl | 4.430324000  | -0.606818000 | 1.561279000  |
| O  | 5.493899000  | 0.344089000  | 1.144097000  |
| O  | 4.126463000  | -1.543782000 | 0.410521000  |
| O  | 4.841924000  | -1.408679000 | 2.746676000  |
| O  | 3.165793000  | 0.150036000  | 1.881744000  |
| O  | -5.357107000 | 2.774741000  | 1.279658000  |
| O  | -4.159568000 | 0.658267000  | 1.586437000  |
| O  | -5.792093000 | 0.890516000  | -0.226210000 |
| O  | -3.653072000 | 2.070756000  | -0.338012000 |

### Complex <sup>3</sup>1'

Zero-point correction= 0.458825 (Hartree/Particle)  
 Thermal correction to Energy= 0.501191  
 Thermal correction to Enthalpy= 0.502135  
 Thermal correction to Gibbs Free Energy= 0.377526  
 Sum of electronic and zero-point Energies= -3334.683092  
 Sum of electronic and thermal Energies= -3334.640726  
 Sum of electronic and thermal Enthalpies= -3334.639782  
 Sum of electronic and thermal Free Energies= -3334.764

|    |              |              |              |
|----|--------------|--------------|--------------|
| Fe | 0.304143000  | -1.418130000 | 0.714022000  |
| N  | 0.889215000  | -2.802636000 | -0.663900000 |
| N  | 2.197589000  | -1.304726000 | 0.949820000  |
| N  | 0.346549000  | 0.102152000  | 1.998936000  |
| N  | -1.650607000 | -1.406781000 | 0.267759000  |
| N  | 0.248821000  | 0.029424000  | -0.817624000 |
| O  | 0.114629000  | -2.549979000 | 1.871234000  |
| C  | -2.545589000 | -2.200776000 | 0.880913000  |
| C  | -2.061172000 | -0.553292000 | -0.704016000 |
| C  | -3.892131000 | -2.195673000 | 0.540750000  |
| H  | -2.145595000 | -2.835111000 | 1.663331000  |
| C  | -3.393027000 | -0.521591000 | -1.112199000 |
| H  | -4.591602000 | -2.827600000 | 1.073378000  |
| H  | -3.736184000 | 0.157841000  | -1.880973000 |
| C  | -4.320354000 | -1.344274000 | -0.479565000 |
| C  | -1.003215000 | 0.299212000  | -1.269327000 |
| C  | 1.286090000  | 0.748517000  | -1.271187000 |
| C  | -1.236516000 | 1.319710000  | -2.186904000 |
| C  | 1.127010000  | 1.783504000  | -2.192339000 |
| H  | 2.278389000  | 0.511348000  | -0.907086000 |
| H  | -2.235762000 | 1.565234000  | -2.522721000 |
| H  | 1.997940000  | 2.342434000  | -2.513555000 |
| C  | -0.156442000 | 2.072035000  | -2.654690000 |
| C  | -0.440461000 | 3.160131000  | -3.645568000 |
| O  | 0.657920000  | 3.880128000  | -3.944433000 |
| O  | -1.532583000 | 3.363114000  | -4.129398000 |
| H  | 0.381442000  | 4.564475000  | -4.582895000 |
| C  | -5.747205000 | -1.258353000 | -0.927330000 |
| O  | -6.585608000 | -1.895899000 | -0.086293000 |
| O  | -6.100826000 | -0.703164000 | -1.942668000 |
| H  | -7.486912000 | -1.751607000 | -0.431493000 |
| C  | 2.232571000  | -3.021275000 | -0.652997000 |
| C  | 0.108213000  | -3.510951000 | -1.487615000 |
| C  | 2.811073000  | -3.967963000 | -1.499738000 |
| C  | 0.621181000  | -4.472109000 | -2.355254000 |
| H  | -0.953290000 | -3.297446000 | -1.441110000 |
| H  | 3.883782000  | -4.122609000 | -1.489715000 |
| H  | -0.048049000 | -5.021597000 | -3.008015000 |
| C  | 2.667243000  | -0.407689000 | 1.830040000  |
| C  | 2.983723000  | -2.177961000 | 0.295017000  |
| C  | 4.034085000  | -0.378750000 | 2.118714000  |
| C  | 4.352893000  | -2.192975000 | 0.544673000  |

|    |              |              |              |
|----|--------------|--------------|--------------|
| H  | 4.445192000  | 0.361727000  | 2.791249000  |
| H  | 5.011091000  | -2.874105000 | 0.018691000  |
| C  | 1.609793000  | 0.456448000  | 2.377660000  |
| C  | -0.706691000 | 0.796723000  | 2.441027000  |
| C  | 1.830022000  | 1.563856000  | 3.187482000  |
| C  | -0.549359000 | 1.915603000  | 3.264354000  |
| H  | -1.698832000 | 0.476586000  | 2.142253000  |
| H  | 2.842226000  | 1.863477000  | 3.430042000  |
| H  | -1.437525000 | 2.459538000  | 3.567885000  |
| C  | 0.732424000  | 2.307037000  | 3.631745000  |
| C  | 4.870978000  | -1.279431000 | 1.466687000  |
| C  | 1.996415000  | -4.700370000 | -2.360071000 |
| H  | 0.888552000  | 3.186327000  | 4.248945000  |
| H  | 5.938718000  | -1.239816000 | 1.646900000  |
| H  | 2.432388000  | -5.438393000 | -3.026193000 |
| Cl | -4.022757000 | 1.822576000  | 1.357629000  |
| O  | -4.221949000 | 2.925467000  | 2.331496000  |
| O  | -5.227806000 | 1.621466000  | 0.503088000  |
| O  | -3.733747000 | 0.537294000  | 2.103969000  |
| O  | -2.830866000 | 2.124114000  | 0.483508000  |
| Cl | 4.765448000  | 1.801369000  | -0.346143000 |
| O  | 4.368933000  | 0.560491000  | -1.117257000 |
| O  | 3.606818000  | 2.178598000  | 0.543819000  |
| O  | 5.059450000  | 2.903042000  | -1.292472000 |
| O  | 5.951920000  | 1.483520000  | 0.504752000  |

### Complex <sup>5</sup>1'

Zero-point correction= 0.457083 (Hartree/Particle)  
 Thermal correction to Energy= 0.500238  
 Thermal correction to Enthalpy= 0.501182  
 Thermal correction to Gibbs Free Energy= 0.373817  
 Sum of electronic and zero-point Energies= -3334.674028  
 Sum of electronic and thermal Energies= -3334.630874  
 Sum of electronic and thermal Enthalpies= -3334.629929  
 Sum of electronic and thermal Enthalpies= -3334.757295

|    |              |              |              |
|----|--------------|--------------|--------------|
| Fe | 0.215196000  | -1.090618000 | -1.057645000 |
| N  | 1.551708000  | 0.095882000  | -2.333589000 |
| N  | 2.153169000  | -1.678241000 | -0.501080000 |
| N  | -0.086815000 | -2.436665000 | 0.607054000  |
| N  | -1.615397000 | -0.267547000 | -1.484255000 |
| N  | 0.158466000  | 0.512712000  | 0.280389000  |
| O  | 0.042615000  | -2.263182000 | -2.168374000 |
| C  | -2.458687000 | -0.781115000 | -2.396477000 |
| C  | -1.985945000 | 0.802329000  | -0.735459000 |
| C  | -3.716457000 | -0.238675000 | -2.620003000 |
| H  | -2.093964000 | -1.649055000 | -2.934191000 |
| C  | -3.227209000 | 1.403953000  | -0.924555000 |
| H  | -4.385239000 | -0.685511000 | -3.344656000 |
| H  | -3.551608000 | 2.244547000  | -0.325688000 |
| C  | -4.103415000 | 0.873152000  | -1.868133000 |
| C  | -0.987587000 | 1.245812000  | 0.250967000  |
| C  | 1.137600000  | 0.845566000  | 1.133155000  |
| C  | -1.168750000 | 2.330829000  | 1.100006000  |
| C  | 1.024589000  | 1.927608000  | 2.006395000  |
| H  | 2.051679000  | 0.266060000  | 1.121674000  |
| H  | -2.083717000 | 2.909147000  | 1.098455000  |
| H  | 1.854923000  | 2.168360000  | 2.657904000  |
| C  | -0.148611000 | 2.676830000  | 1.990605000  |
| C  | -0.369830000 | 3.864675000  | 2.877124000  |
| O  | 0.625691000  | 4.031791000  | 3.768429000  |
| O  | -1.334395000 | 4.593669000  | 2.797392000  |
| H  | 0.406156000  | 4.826447000  | 4.290731000  |
| C  | -5.443743000 | 1.528198000  | -2.014934000 |
| O  | -6.286442000 | 0.801316000  | -2.775251000 |
| O  | -5.726351000 | 2.596931000  | -1.523583000 |
| H  | -7.135773000 | 1.282006000  | -2.786372000 |

|    |              |              |              |
|----|--------------|--------------|--------------|
| C  | 2.870099000  | -0.138579000 | -2.163555000 |
| C  | 1.147907000  | 1.040568000  | -3.190613000 |
| C  | 3.832327000  | 0.615380000  | -2.840004000 |
| C  | 2.046809000  | 1.810687000  | -3.922712000 |
| H  | 0.075238000  | 1.177234000  | -3.286089000 |
| H  | 4.883051000  | 0.483507000  | -2.616539000 |
| H  | 1.679974000  | 2.567600000  | -4.607566000 |
| C  | 2.291209000  | -2.614606000 | 0.451640000  |
| C  | 3.200757000  | -1.211446000 | -1.198020000 |
| C  | 3.549539000  | -3.154971000 | 0.727920000  |
| C  | 4.481076000  | -1.726461000 | -0.980623000 |
| H  | 3.673727000  | -3.910056000 | 1.494878000  |
| H  | 5.333163000  | -1.349011000 | -1.526606000 |
| C  | 1.031022000  | -2.987379000 | 1.133861000  |
| C  | -1.288492000 | -2.704910000 | 1.128673000  |
| C  | 0.955699000  | -3.826768000 | 2.244699000  |
| C  | -1.433390000 | -3.528138000 | 2.248446000  |
| H  | -2.158290000 | -2.260861000 | 0.652464000  |
| H  | 1.854466000  | -4.254073000 | 2.674476000  |
| H  | -2.427278000 | -3.686764000 | 2.653003000  |
| C  | -0.293755000 | -4.092066000 | 2.811743000  |
| C  | 4.644607000  | -2.706691000 | -0.005657000 |
| C  | 3.411666000  | 1.597958000  | -3.731039000 |
| H  | -0.365942000 | -4.731307000 | 3.686583000  |
| H  | 5.632375000  | -3.109488000 | 0.192705000  |
| H  | 4.144251000  | 2.203376000  | -4.255445000 |
| Cl | -4.382996000 | -0.859052000 | 1.427987000  |
| O  | -4.844630000 | -1.783987000 | 2.495035000  |
| O  | -5.426449000 | 0.146546000  | 1.082473000  |
| O  | -4.042278000 | -1.655958000 | 0.185543000  |
| O  | -3.128277000 | -0.152529000 | 1.875472000  |
| Cl | 4.772696000  | 1.383166000  | 0.769638000  |
| O  | 5.416640000  | 2.360763000  | 1.674827000  |
| O  | 3.657239000  | 2.035657000  | -0.002550000 |
| O  | 4.182478000  | 0.246972000  | 1.572155000  |
| O  | 5.772993000  | 0.824582000  | -0.201679000 |

### Complex 2

Zero-point correction= 0.529867 (Hartree/Particle)  
 Thermal correction to Energy= 0.560911  
 Thermal correction to Enthalpy= 0.561855  
 Thermal correction to Gibbs Free Energy= 0.468299  
 Sum of electronic and zero-point Energies= -2338.644785  
 Sum of electronic and thermal Energies= -2338.613741  
 Sum of electronic and thermal Enthalpies= -2338.612797  
 Sum of electronic and thermal Free Energies= -2338.7063

|    |              |             |              |
|----|--------------|-------------|--------------|
| Ru | 1.671051000  | 0.045548000 | 0.129834000  |
| C  | -0.777540000 | 2.070975000 | 0.237189000  |
| H  | -1.156378000 | 3.012130000 | 0.658614000  |
| H  | -1.562386000 | 1.322209000 | 0.318986000  |
| H  | -0.547482000 | 2.198554000 | -0.818929000 |
| N  | 2.800019000  | 1.721847000 | -0.787180000 |
| N  | 0.439378000  | 1.648776000 | 0.993397000  |
| C  | 2.789788000  | 1.781846000 | -2.274575000 |
| H  | 3.210513000  | 0.872370000 | -2.698421000 |
| H  | 3.373128000  | 2.648746000 | -2.617107000 |
| C  | 2.131634000  | 2.972884000 | -0.280579000 |
| H  | 1.404081000  | 3.277064000 | -1.035478000 |
| H  | 2.870577000  | 3.781597000 | -0.196473000 |
| C  | 4.212494000  | 1.628750000 | -0.303041000 |
| H  | 4.770397000  | 2.480464000 | -0.722823000 |
| H  | 4.190260000  | 1.729486000 | 0.783904000  |
| C  | 4.952513000  | 0.331660000 | -0.678251000 |
| H  | 6.006474000  | 0.511044000 | -0.427753000 |
| H  | 4.942746000  | 0.175138000 | -1.761771000 |

|   |              |              |              |
|---|--------------|--------------|--------------|
| C | 4.565351000  | -0.950311000 | 0.074280000  |
| H | 5.324391000  | -1.721582000 | -0.126958000 |
| H | 4.563028000  | -0.734080000 | 1.142318000  |
| C | 3.259508000  | -2.167662000 | -1.584893000 |
| H | 4.020744000  | -2.961902000 | -1.595473000 |
| H | 3.496753000  | -1.429223000 | -2.349668000 |
| H | 2.285822000  | -2.582458000 | -1.835189000 |
| N | 0.486563000  | -1.604208000 | 0.887927000  |
| N | 3.220545000  | -1.523515000 | -0.251298000 |
| S | 0.445614000  | -0.364074000 | -1.934591000 |
| C | -0.780458000 | -1.827384000 | 0.092554000  |
| H | -1.498825000 | -1.054969000 | 0.356188000  |
| H | -1.213732000 | -2.787077000 | 0.413654000  |
| C | -0.575908000 | -1.804339000 | -1.412958000 |
| H | -1.568736000 | -1.710445000 | -1.863585000 |
| H | -0.115460000 | -2.725020000 | -1.794265000 |
| C | 2.843489000  | -2.522252000 | 0.801158000  |
| C | 1.349945000  | -2.831172000 | 0.774236000  |
| H | 1.087237000  | -3.332763000 | -0.158209000 |
| H | 1.108549000  | -3.526937000 | -1.588377000 |
| C | 0.130289000  | -1.338961000 | 2.321910000  |
| H | -0.467173000 | -2.192005000 | 2.675662000  |
| H | 1.068568000  | -1.315343000 | 2.882668000  |
| C | -0.671189000 | -0.052929000 | 2.581180000  |
| C | 0.062801000  | 1.280606000  | 2.401798000  |
| H | 1.763398000  | 1.868506000  | -2.629946000 |
| C | 1.430817000  | 2.769410000  | 1.055260000  |
| H | 2.158451000  | 2.517078000  | 1.827293000  |
| H | 0.923593000  | 3.701640000  | 1.342504000  |
| H | 0.990193000  | 1.259627000  | 2.975414000  |
| H | -0.575910000 | 2.085451000  | 2.792520000  |
| H | -0.938057000 | -0.092269000 | 3.646481000  |
| H | -1.625628000 | -0.056388000 | 2.048448000  |
| H | 3.114109000  | -2.084267000 | 1.762141000  |
| H | 3.414875000  | -3.452896000 | 0.664944000  |
| O | 2.598636000  | 0.210208000  | 1.700029000  |
| O | -3.354108000 | 0.049732000  | 0.855208000  |
| O | -3.814625000 | 1.419855000  | -1.175971000 |
| C | -5.790451000 | 0.014873000  | -0.115054000 |
| F | -6.522239000 | 0.053857000  | -1.239552000 |
| F | -6.168142000 | 1.041315000  | 0.666164000  |
| F | -6.077891000 | -1.127824000 | 0.532316000  |
| S | -3.976231000 | 0.115961000  | -0.503797000 |
| O | -3.725413000 | -1.087067000 | -1.331532000 |

### Complex 2'

Zero-point correction= 0.531445 (Hartree/Particle)  
 Thermal correction to Energy= 0.562107  
 Thermal correction to Enthalpy= 0.563051  
 Thermal correction to Gibbs Free Energy= 0.470492  
 Sum of electronic and zero-point Energies= -2368.181659  
 Sum of electronic and thermal Energies= -2368.150997  
 Sum of electronic and thermal Enthalpies= -2368.150053  
 Sum of electronic and thermal Free Energies= -2368.2426

|    |              |             |              |
|----|--------------|-------------|--------------|
| Fe | 1.795650000  | 0.032583000 | 0.174770000  |
| C  | -0.668496000 | 1.969164000 | 0.210364000  |
| H  | -1.038255000 | 2.924081000 | 0.607779000  |
| H  | -1.462091000 | 1.235837000 | 0.325167000  |
| H  | -0.445985000 | 2.061317000 | -0.849675000 |
| N  | 2.928890000  | 1.635492000 | -0.733537000 |
| N  | 0.549244000  | 1.562250000 | 0.975319000  |
| C  | 3.041227000  | 1.696897000 | -2.217319000 |
| H  | 3.493984000  | 0.790528000 | -2.611085000 |
| H  | 3.655249000  | 2.563342000 | -2.503025000 |
| C  | 2.209303000  | 2.878395000 | -0.302873000 |

|   |              |              |              |
|---|--------------|--------------|--------------|
| H | 1.473753000  | 3.112621000  | -1.074258000 |
| H | 2.914990000  | 3.719790000  | -0.255968000 |
| C | 4.305835000  | 1.606956000  | -0.151095000 |
| H | 4.848176000  | 2.486997000  | -0.530520000 |
| H | 4.207740000  | 1.699401000  | 0.931191000  |
| C | 5.121064000  | 0.350592000  | -0.481435000 |
| H | 6.139460000  | 0.543374000  | -0.119477000 |
| H | 5.222890000  | 0.219428000  | -1.563524000 |
| C | 4.668935000  | -0.942564000 | 0.200469000  |
| H | 5.418470000  | -1.727531000 | 0.016023000  |
| H | 4.614148000  | -0.763943000 | 1.273714000  |
| C | 3.434367000  | -2.053376000 | -1.576018000 |
| H | 4.185384000  | -2.857613000 | -1.578506000 |
| H | 3.724562000  | -1.291194000 | -2.296979000 |
| H | 2.471031000  | -2.441043000 | -1.897351000 |
| N | 0.594230000  | -1.532954000 | 0.804584000  |
| N | 3.333477000  | -1.465273000 | -0.219776000 |
| S | 0.715556000  | -0.252727000 | -1.888774000 |
| C | -0.672695000 | -1.698482000 | -0.002758000 |
| H | -1.377537000 | -0.923115000 | 0.280963000  |
| H | -1.132258000 | -2.655967000 | 0.285739000  |
| C | -0.431177000 | -1.629886000 | -1.497889000 |
| H | -1.399659000 | -1.444639000 | -1.972102000 |
| H | -0.029658000 | -2.565743000 | -1.907195000 |
| C | 2.906488000  | -2.509516000 | 0.757434000  |
| C | 1.416879000  | -2.776497000 | 0.638867000  |
| H | 1.186990000  | -3.200229000 | -0.338799000 |
| H | 1.111079000  | -3.518102000 | 1.388040000  |
| C | 0.230638000  | -1.358800000 | 2.250352000  |
| H | -0.366976000 | -2.234507000 | 2.541984000  |
| H | 1.163629000  | -1.369113000 | 2.818272000  |
| C | -0.573764000 | -0.097101000 | 2.576130000  |
| C | 0.162427000  | 1.227685000  | 2.386189000  |
| H | 2.051089000  | 1.793068000  | -2.659481000 |
| C | 1.513017000  | 2.700420000  | 1.031232000  |
| H | 2.238668000  | 2.484937000  | 1.815459000  |
| H | 0.980768000  | 3.625494000  | 1.293706000  |
| H | 1.083164000  | 1.215965000  | 2.969915000  |
| H | -0.476253000 | 2.043514000  | 2.753630000  |
| H | -0.803087000 | -0.160096000 | 3.648728000  |
| H | -1.544361000 | -0.093247000 | 2.073132000  |
| H | 3.142190000  | -2.136948000 | 1.754046000  |
| H | 3.467899000  | -3.441263000 | 0.591060000  |
| O | 2.595234000  | 0.164256000  | 1.621633000  |
| O | -3.295983000 | 0.036187000  | 0.883188000  |
| O | -3.779536000 | 1.489236000  | -1.084484000 |
| C | -5.722207000 | -0.023581000 | -0.111517000 |
| F | -6.445106000 | 0.047848000  | -1.240159000 |
| F | -6.137540000 | 0.951669000  | 0.714491000  |
| F | -5.979866000 | -1.204651000 | 0.476842000  |
| S | -3.908742000 | 0.150449000  | -0.476408000 |
| O | -3.612770000 | -1.001972000 | -1.360239000 |

### Complex '2'

Zero-point correction= 0.528726 (Hartree/Particle)  
 Thermal correction to Energy= 0.560264  
 Thermal correction to Enthalpy= 0.561208  
 Thermal correction to Gibbs Free Energy= 0.466078  
 Sum of electronic and zero-point Energies= -2368.183683  
 Sum of electronic and thermal Energies= -2368.152145  
 Sum of electronic and thermal Enthalpies= -2368.151201  
 Sum of electronic and thermal Free Energies= -2368.2463  
 Fe 1.763249000 0.038569000 0.184386000  
 C -0.699143000 2.109456000 0.343927000  
 H -1.062713000 3.051052000 0.781131000

|   |              |              |              |
|---|--------------|--------------|--------------|
| H | -1.491218000 | 1.368076000  | 0.427636000  |
| H | -0.491832000 | 2.248737000  | -0.715813000 |
| N | 2.894249000  | 1.722143000  | -0.791014000 |
| N | 0.522610000  | 1.664492000  | 1.065580000  |
| C | 2.907253000  | 1.816818000  | -2.272115000 |
| H | 3.320744000  | 0.910940000  | -2.711797000 |
| H | 3.507941000  | 2.682167000  | -2.590604000 |
| C | 2.213730000  | 2.946133000  | -0.257876000 |
| H | 1.463166000  | 3.242004000  | -0.993178000 |
| H | 2.939099000  | 3.769661000  | -0.186022000 |
| C | 4.295872000  | 1.623708000  | -0.283118000 |
| H | 4.855450000  | 2.490661000  | -0.670714000 |
| H | 4.257134000  | 1.700185000  | 0.804921000  |
| C | 5.058273000  | 0.344456000  | -0.673766000 |
| H | 6.109020000  | 0.537611000  | -0.420224000 |
| H | 5.051619000  | 0.201089000  | -1.759174000 |
| C | 4.688229000  | -0.953198000 | 0.060505000  |
| H | 5.466808000  | -1.706332000 | -0.142955000 |
| H | 4.682944000  | -0.751858000 | -1.131969000 |
| C | 3.396805000  | -2.158897000 | -1.619036000 |
| H | 4.151610000  | -2.960650000 | -1.651906000 |
| H | 3.637247000  | -1.410598000 | -2.374077000 |
| H | 2.420649000  | -2.565847000 | -1.876691000 |
| N | 0.579341000  | -1.623597000 | 0.876536000  |
| N | 3.360718000  | -1.538262000 | -0.280971000 |
| S | 0.599366000  | -0.252028000 | -1.809842000 |
| C | -0.680057000 | -1.818832000 | -0.075914000 |
| H | -1.405610000 | -1.061930000 | 0.365642000  |
| H | -1.116290000 | -2.794662000 | 0.340395000  |
| C | -0.442318000 | -1.715519000 | -1.419645000 |
| H | -1.419785000 | -1.577572000 | -1.893390000 |
| H | 0.024958000  | -2.613394000 | -1.842407000 |
| C | 2.957878000  | -2.528985000 | 0.754947000  |
| C | 1.455316000  | -2.826904000 | 0.727767000  |
| H | 1.192745000  | -3.310257000 | -0.214377000 |
| H | 1.225956000  | -3.545691000 | 1.526304000  |
| C | 0.242820000  | -1.375068000 | 2.316950000  |
| H | -0.353409000 | -2.231401000 | 2.667503000  |
| H | 1.186730000  | -1.365724000 | 2.868048000  |
| C | -0.551093000 | -0.089338000 | 2.611389000  |
| C | 0.180977000  | 1.252258000  | 2.464920000  |
| H | 1.889084000  | 1.928056000  | -2.643826000 |
| C | 1.540004000  | 2.747972000  | 1.099916000  |
| H | 2.282266000  | 2.486777000  | 1.854881000  |
| H | 1.069188000  | 3.698840000  | 1.392576000  |
| H | 1.117206000  | 1.215587000  | 3.023763000  |
| H | -0.452024000 | 2.039180000  | 2.902137000  |
| H | -0.817120000 | -0.158203000 | 3.675338000  |
| H | -1.506784000 | -0.077197000 | 2.080461000  |
| H | 3.232953000  | -2.113923000 | 1.724538000  |
| H | 3.505459000  | -3.474550000 | 0.615272000  |
| O | 2.624185000  | 0.164256000  | 1.603271000  |
| O | -3.253351000 | 0.019514000  | 0.857483000  |
| O | -3.717973000 | 1.477010000  | -1.112879000 |
| C | -5.673383000 | -0.026688000 | -0.153434000 |
| F | -6.388025000 | 0.049697000  | -1.287004000 |
| F | -6.089374000 | 0.949763000  | 0.670784000  |
| F | -5.940891000 | -1.207114000 | 0.431716000  |
| S | -3.856633000 | 0.139110000  | -0.506112000 |
| O | -3.563135000 | -1.015244000 | -1.388876000 |

### BA

Zero-point correction= 0.133333 (Hartree/Particle)  
 Thermal correction to Energy= 0.140449  
 Thermal correction to Enthalpy= 0.141393  
 Thermal correction to Gibbs Free Energy= 0.101384  
 Sum of electronic and zero-point Energies= -346.634293

Sum of electronic and thermal Energies= -346.627177  
 Sum of electronic and thermal Enthalpies= -346.626233  
 Sum of electronic and thermal Free Energies= -346.66624

|   |              |              |              |
|---|--------------|--------------|--------------|
| C | 1.378346000  | -1.343919000 | 0.042510000  |
| C | 0.013145000  | -1.062864000 | 0.113119000  |
| C | -0.438988000 | 0.260863000  | 0.081725000  |
| C | 0.497674000  | 1.295499000  | -0.023967000 |
| C | 1.863207000  | 1.016242000  | -0.085419000 |
| C | 2.307969000  | -0.306760000 | -0.053024000 |
| H | 1.716499000  | -2.376939000 | 0.061573000  |
| H | -0.713318000 | -1.865890000 | 0.179015000  |
| H | 0.156299000  | 2.328310000  | -0.062180000 |
| H | 2.578023000  | 1.830892000  | -0.168651000 |
| H | 3.370778000  | -0.527448000 | -0.107680000 |
| C | -1.911451000 | 0.582269000  | 0.205932000  |
| H | -2.156632000 | 0.761025000  | 1.267262000  |
| H | -2.128252000 | 1.519178000  | -0.332459000 |
| O | -2.684242000 | -0.497581000 | -0.306854000 |
| H | -3.608871000 | -0.336453000 | -0.067299000 |

**EB**

Zero-point correction= 0.157375 (Hartree/Particle)  
 Thermal correction to Energy= 0.164699  
 Thermal correction to Enthalpy= 0.165643  
 Thermal correction to Gibbs Free Energy= 0.125145  
 Sum of electronic and zero-point Energies= -310.722853  
 Sum of electronic and thermal Energies= -310.715528  
 Sum of electronic and thermal Enthalpies= -310.714584  
 Sum of electronic and thermal Free Energies= -310.755082

|   |              |              |              |
|---|--------------|--------------|--------------|
| C | -0.434678000 | 0.000078000  | -0.328435000 |
| C | 0.270520000  | 1.202597000  | -0.184975000 |
| C | 1.637314000  | 1.205767000  | 0.096272000  |
| C | 2.326003000  | -0.000079000 | 0.238545000  |
| C | 1.637171000  | -1.205864000 | 0.096215000  |
| C | 0.270402000  | -1.202541000 | -0.185025000 |
| H | -0.257890000 | 2.147093000  | -0.299391000 |
| H | 2.165348000  | 2.150444000  | 0.199392000  |
| H | 3.391267000  | -0.000175000 | 0.453709000  |
| H | 2.165153000  | -2.150576000 | 0.199279000  |
| H | -0.258157000 | -2.146949000 | -0.299482000 |
| C | -1.926434000 | 0.000186000  | -0.592421000 |
| H | -2.192702000 | 0.879593000  | -1.192454000 |
| H | -2.192781000 | -0.878908000 | -1.192876000 |
| C | -2.763059000 | -0.000126000 | 0.700012000  |
| H | -3.835617000 | -0.000031000 | 0.472856000  |
| H | -2.544056000 | -0.884628000 | 1.308683000  |
| H | -2.543991000 | 0.884029000  | 1.309154000  |

**DHA**

Zero-point correction= 0.217567 (Hartree/Particle)  
 Thermal correction to Energy= 0.227576  
 Thermal correction to Enthalpy= 0.228521  
 Thermal correction to Gibbs Free Energy= 0.181846  
 Sum of electronic and zero-point Energies= -540.517533  
 Sum of electronic and thermal Energies= -540.507524  
 Sum of electronic and thermal Enthalpies= -540.506579  
 Sum of electronic and thermal Free Energies= -540.55325

|   |              |              |              |
|---|--------------|--------------|--------------|
| C | -3.567119000 | 0.697799000  | -0.496220000 |
| C | -2.414367000 | 1.390008000  | -0.123743000 |
| C | -1.259185000 | 0.702208000  | 0.259410000  |
| C | -1.259184000 | -0.702208000 | 0.259409000  |
| C | -2.414366000 | -1.390008000 | -0.123744000 |
| C | -3.567119000 | -0.697799000 | -0.496220000 |
| C | -0.000001000 | 1.432344000  | 0.684130000  |
| C | 0.000001000  | -1.432345000 | 0.684128000  |

|   |              |              |              |
|---|--------------|--------------|--------------|
| C | 1.259185000  | -0.702207000 | 0.259410000  |
| C | 1.259183000  | 0.702208000  | 0.259407000  |
| C | 2.414366000  | 1.390008000  | -0.123744000 |
| H | 2.409116000  | 2.478015000  | -0.132903000 |
| C | 3.567119000  | 0.697800000  | -0.496220000 |
| C | 3.567119000  | -0.697799000 | -0.496220000 |
| C | 2.414368000  | -1.390008000 | -0.123742000 |
| H | -0.000001000 | 2.455320000  | 0.290527000  |
| H | -4.457478000 | 1.245892000  | -0.792846000 |
| H | -2.409117000 | 2.478014000  | -0.132902000 |
| H | -2.409116000 | -2.478014000 | -0.132903000 |
| H | -4.457477000 | -1.245893000 | -0.792846000 |
| H | 0.000000000  | -1.534840000 | 1.782845000  |
| H | 4.457477000  | 1.245893000  | -0.792846000 |
| H | 4.457478000  | -1.245891000 | -0.792846000 |
| H | 2.409118000  | -2.478014000 | -0.132901000 |
| H | 0.000000000  | 1.534833000  | 1.782847000  |
| H | 0.000001000  | -2.455319000 | 0.290520000  |

**1+BA**

**<sup>3</sup>TS**

Zero-point correction= 0.585577 (Hartree/Particle)  
 Thermal correction to Energy= 0.636978  
 Thermal correction to Enthalpy= 0.637922  
 Thermal correction to Gibbs Free Energy= 0.488560  
 Sum of electronic and zero-point Energies= -3651.751973  
 Sum of electronic and thermal Energies= -3651.700571  
 Sum of electronic and thermal Enthalpies= -3651.699627  
 Sum of electronic and thermal Free Energies= -3651.8489

|    |              |              |              |
|----|--------------|--------------|--------------|
| Ru | -0.321665000 | -0.421596000 | -0.676023000 |
| N  | -0.134116000 | -1.486146000 | 1.144365000  |
| N  | -2.171205000 | -0.212454000 | 0.090917000  |
| N  | -1.217573000 | 0.902569000  | -2.087933000 |
| N  | 1.694881000  | -0.490717000 | -1.375784000 |
| N  | 0.605216000  | 1.286227000  | 0.292957000  |
| O  | -0.701187000 | -1.952150000 | -1.699170000 |
| C  | 2.163405000  | -1.432559000 | -2.212737000 |
| C  | 2.535326000  | 0.457597000  | -0.887601000 |
| C  | 3.490951000  | -1.471631000 | -2.615844000 |
| H  | 1.430719000  | -2.163159000 | -2.537596000 |
| C  | 3.877775000  | 0.481285000  | -1.266937000 |
| H  | 3.840488000  | -2.257076000 | -3.274187000 |
| H  | 4.567757000  | 1.216990000  | -0.875861000 |
| C  | 4.363101000  | -0.493380000 | -2.132994000 |
| C  | 1.935523000  | 1.434812000  | 0.041076000  |
| C  | -0.024243000 | 2.154970000  | 1.100358000  |
| C  | 2.658468000  | 2.467618000  | 0.633423000  |
| C  | 0.639574000  | 3.215063000  | 1.711767000  |
| H  | -1.089878000 | 2.032071000  | 1.250884000  |
| H  | 3.720830000  | 2.586999000  | 0.466263000  |
| H  | 0.081936000  | 3.901604000  | 2.336184000  |
| C  | 2.005431000  | 3.366959000  | 1.478068000  |
| C  | 2.814975000  | 4.474302000  | 2.078840000  |
| O  | 2.107929000  | 5.206971000  | 2.962714000  |
| O  | 3.974172000  | 4.692681000  | 1.801357000  |
| H  | 2.707795000  | 5.903464000  | 3.290335000  |
| C  | 5.814974000  | -0.446871000 | -2.490533000 |
| O  | 6.214195000  | -1.547002000 | -3.163780000 |
| O  | 6.548225000  | 0.479139000  | -2.225395000 |
| H  | 7.171475000  | -1.439787000 | -3.319623000 |
| C  | -1.290895000 | -1.504141000 | 1.877917000  |
| C  | 0.967597000  | -2.091671000 | 1.607325000  |
| C  | -1.328091000 | -2.143789000 | 3.114388000  |
| C  | 0.991030000  | -2.730371000 | 2.849331000  |
| H  | 1.852790000  | -2.073047000 | 0.980209000  |

|    |              |              |              |    |              |              |              |
|----|--------------|--------------|--------------|----|--------------|--------------|--------------|
| H  | -2.244991000 | -2.157796000 | 3.692131000  | C  | 1.470701000  | 2.173577000  | 0.726607000  |
| H  | 1.926318000  | -3.165226000 | 3.186123000  | C  | 0.171487000  | 3.646080000  | 2.664855000  |
| C  | -3.064042000 | 0.552483000  | -0.574668000 | H  | -0.961232000 | 1.805432000  | 2.913829000  |
| C  | -2.438919000 | -0.788684000 | 1.283352000  | C  | 1.874136000  | 3.485130000  | 0.972168000  |
| C  | -4.346888000 | 0.724223000  | -0.053421000 | H  | -0.373811000 | 4.206420000  | 3.413984000  |
| C  | -3.708972000 | -0.638941000 | 1.843881000  | H  | 2.660633000  | 3.957616000  | 0.398960000  |
| H  | -5.061304000 | 1.373154000  | -0.538624000 | C  | 1.214669000  | 4.231611000  | 1.944156000  |
| H  | -3.948297000 | -1.088580000 | 2.799977000  | C  | 2.074499000  | 1.306169000  | -0.298733000 |
| C  | -2.522962000 | 1.182371000  | -1.798482000 | C  | 2.085201000  | -0.834027000 | -1.262244000 |
| C  | -0.637764000 | 1.463418000  | -3.159348000 | C  | 3.095783000  | 1.716889000  | -1.150765000 |
| C  | -3.259569000 | 2.049280000  | -2.607356000 | C  | 3.111380000  | -0.481459000 | -2.134268000 |
| C  | -1.323942000 | 2.324456000  | -4.008748000 | H  | 1.684986000  | -1.841529000 | -1.275641000 |
| H  | 0.401487000  | 1.203690000  | -3.266414000 | H  | 3.484042000  | 2.726642000  | -1.123825000 |
| H  | -4.268026000 | 2.323297000  | -2.328544000 | H  | 3.499749000  | -1.221390000 | -2.822711000 |
| H  | -0.814841000 | 2.758983000  | -4.862131000 | C  | 3.620431000  | 0.815513000  | -2.078447000 |
| C  | -2.654925000 | 2.623263000  | -3.721171000 | C  | 4.730639000  | 1.292584000  | -2.964256000 |
| C  | -4.660554000 | 0.115522000  | 1.160901000  | O  | 5.073444000  | 0.379074000  | -3.893900000 |
| C  | -0.172833000 | -2.755038000 | 3.608903000  | O  | 5.263394000  | 2.375021000  | -2.854630000 |
| H  | -3.214067000 | 3.313877000  | -4.344395000 | H  | 5.800760000  | 0.768608000  | -4.415220000 |
| H  | -5.645546000 | -0.419415000 | 1.591998000  | C  | 1.660834000  | 5.644542000  | 2.157013000  |
| H  | -0.191126000 | -3.239292000 | 4.580634000  | O  | 0.810376000  | 6.337264000  | 2.942449000  |
| Cl | -3.186757000 | 4.057306000  | 0.552072000  | O  | 2.679579000  | 6.106833000  | 1.695597000  |
| Cl | 4.487517000  | -1.653210000 | 1.506235000  | H  | 1.162072000  | 7.246036000  | 2.995162000  |
| O  | 5.838306000  | -1.263973000 | 1.024355000  | C  | -1.931953000 | -1.177806000 | -1.150634000 |
| O  | 3.773826000  | -2.419954000 | 0.412565000  | C  | -1.787084000 | 1.168039000  | -1.102502000 |
| O  | 4.564345000  | -2.506386000 | 2.726126000  | C  | -2.844781000 | -1.117616000 | -2.197544000 |
| O  | 3.675799000  | -0.419415000 | 1.807798000  | C  | -2.683745000 | 1.284113000  | -2.167056000 |
| O  | -3.249101000 | 5.425137000  | 1.113415000  | H  | -1.372630000 | 2.054232000  | -0.634518000 |
| O  | -3.005792000 | 3.048601000  | 1.660841000  | H  | -3.260114000 | -2.028336000 | -2.612559000 |
| O  | -4.454528000 | 3.738156000  | -0.191628000 | H  | -2.922870000 | 2.276391000  | -2.534579000 |
| O  | -2.023637000 | 3.928527000  | -0.393501000 | C  | 0.116790000  | -3.301373000 | 1.021301000  |
| C  | -4.750898000 | -4.434496000 | 1.130577000  | C  | -1.438279000 | -2.441193000 | -0.558076000 |
| C  | -4.465120000 | -3.703587000 | -0.022618000 | C  | -0.263624000 | -4.612534000 | 0.726284000  |
| C  | -3.274531000 | -3.936895000 | -0.731518000 | C  | -1.840247000 | -3.734643000 | -0.893222000 |
| C  | -2.375214000 | -4.908646000 | -0.252296000 | H  | 0.229004000  | -5.453383000 | 1.192546000  |
| C  | -2.662651000 | -5.631485000 | 0.901843000  | H  | -2.597700000 | -3.900914000 | -1.649699000 |
| C  | -3.853341000 | -5.397816000 | 1.598674000  | C  | 1.167153000  | -2.877499000 | 1.969868000  |
| H  | -5.684180000 | -4.259430000 | 1.659797000  | C  | 2.256079000  | -1.054522000 | 2.960403000  |
| H  | -5.166343000 | -2.964862000 | -0.394849000 | C  | 2.009042000  | -3.768698000 | 2.636971000  |
| H  | -1.448105000 | -5.091658000 | -0.790694000 | C  | 3.112570000  | -1.894273000 | 3.663052000  |
| H  | -1.961175000 | -6.381517000 | 1.256493000  | H  | 2.315970000  | 0.024533000  | 3.046218000  |
| H  | -4.081878000 | -5.968532000 | 2.494574000  | H  | 1.942933000  | -4.828514000 | 2.430482000  |
| C  | -2.928406000 | -3.177191000 | -1.949495000 | H  | 3.867356000  | -1.468754000 | 4.315280000  |
| H  | -1.824782000 | -2.494951000 | -1.699004000 | C  | 2.987966000  | -3.272439000 | 3.491436000  |
| H  | -2.534529000 | -3.800795000 | -2.764768000 | C  | -1.249958000 | -4.814794000 | -0.236936000 |
| O  | -3.925336000 | -2.294900000 | -2.359618000 | C  | -3.220300000 | 0.126364000  | -2.715539000 |
| H  | -3.700537000 | -1.970181000 | -3.244535000 | H  | 3.659462000  | -3.956143000 | 4.000679000  |
|    |              |              |              | H  | -1.546763000 | -5.826297000 | -0.493366000 |
|    |              |              |              | H  | -3.926024000 | 0.176437000  | -3.538783000 |
|    |              |              |              | Cl | 2.943313000  | -4.445040000 | -0.902899000 |
|    |              |              |              | Cl | -0.454289000 | 4.492630000  | -1.415670000 |
|    |              |              |              | O  | 0.413254000  | 5.639783000  | -1.032591000 |
|    |              |              |              | O  | -1.219493000 | 4.025588000  | -0.194652000 |
|    |              |              |              | O  | -1.417707000 | 4.864878000  | -2.485050000 |
|    |              |              |              | O  | 0.403345000  | 3.343194000  | -1.884040000 |
|    |              |              |              | O  | 3.953884000  | -4.965894000 | -1.848653000 |
|    |              |              |              | O  | 1.735245000  | -3.941203000 | -1.659726000 |
|    |              |              |              | O  | 2.502091000  | -5.525007000 | 0.044852000  |
|    |              |              |              | O  | 3.504487000  | -3.298061000 | -0.107425000 |
|    |              |              |              | C  | -7.379975000 | -2.166185000 | -0.630732000 |
|    |              |              |              | C  | -6.212699000 | -1.854014000 | 0.051526000  |
|    |              |              |              | C  | -5.861555000 | -0.495371000 | 0.305115000  |
|    |              |              |              | C  | -6.750345000 | 0.516824000  | -0.161067000 |
|    |              |              |              | C  | -7.911353000 | 0.186227000  | -0.842136000 |
|    |              |              |              | C  | -8.239930000 | -1.156398000 | -1.086798000 |
|    |              |              |              | H  | -7.632186000 | -3.209189000 | -0.808969000 |
|    |              |              |              | H  | -5.556484000 | -2.640302000 | 0.410914000  |

**<sup>3</sup>II**

Zero-point correction= 0.589900 (Hartree/Particle)

Thermal correction to Energy= 0.641843

Thermal correction to Enthalpy= 0.642788

Thermal correction to Gibbs Free Energy= 0.492680

Sum of electronic and zero-point Energies= -3651.780429

Sum of electronic and thermal Energies= -3651.728486

Sum of electronic and thermal Enthalpies= -3651.727541

Sum of electronic and thermal Free Energies= -3651.8776

|    |              |              |              |
|----|--------------|--------------|--------------|
| Ru | -0.030547000 | -0.392780000 | 0.948328000  |
| N  | -1.415000000 | -0.025121000 | -0.617571000 |
| N  | -0.491861000 | -2.275267000 | 0.390721000  |
| N  | 1.305214000  | -1.526835000 | 2.138417000  |
| N  | 0.467247000  | 1.609637000  | 1.448523000  |
| N  | 1.577851000  | 0.037778000  | -0.373547000 |
| O  | -1.380855000 | -0.435063000 | 2.404585000  |
| C  | -0.169029000 | 2.328301000  | 2.389585000  |

|   |             |             |             |
|---|-------------|-------------|-------------|
| H | -6.50616000 | 1.56063000  | 0.02380500  |
| H | -8.57272200 | 0.97693900  | -1.18762000 |
| H | -9.15221600 | -1.41011200 | -1.61880200 |
| C | -4.67878400 | -0.14197700 | 0.98350100  |
| H | -1.36506200 | -1.28561200 | 2.87952900  |
| H | -4.42292300 | 0.89516900  | 1.18622000  |
| O | -3.81775100 | -1.09870200 | 1.40941200  |
| H | -3.01220800 | -0.68514000 | 1.80499400  |

**1'+BA**  
**<sup>3</sup>TS**

Zero-point correction= 0.587104 (Hartree/Particle)  
 Thermal correction to Energy= 0.638097  
 Thermal correction to Enthalpy= 0.639041  
 Thermal correction to Gibbs Free Energy= 0.491853  
 Sum of electronic and zero-point Energies= -3681.304656  
 Sum of electronic and thermal Energies= -3681.253663  
 Sum of electronic and thermal Enthalpies= -3681.252719  
 Sum of electronic and thermal Free Energies= -3681.3999

|    |             |             |             |
|----|-------------|-------------|-------------|
| Fe | 0.20587600  | 0.43686800  | 0.74362900  |
| N  | 0.84939300  | 0.44173400  | 2.69025700  |
| N  | 1.73311800  | 1.57231100  | 0.55296000  |
| N  | 0.14164400  | 0.70617300  | -1.22783600 |
| N  | -1.27189400 | -0.91069400 | 0.97167700  |
| N  | 1.23864100  | -1.34118800 | 0.39456000  |
| O  | -0.88216700 | 1.72644200  | 1.11055400  |
| C  | -2.53622400 | -0.57356300 | 1.26484400  |
| C  | -0.94987100 | -2.21756800 | 0.77847300  |
| C  | -3.54281000 | -1.52575800 | 1.40907600  |
| H  | -2.72191600 | 0.48834900  | 1.36332700  |
| C  | -1.91002200 | -3.21682300 | 0.89819900  |
| H  | -4.56037700 | -1.21526400 | 1.60355500  |
| H  | -1.67643600 | -4.26023900 | 0.72588600  |
| C  | -3.22298400 | -2.86733400 | 1.21825000  |
| C  | 0.46293100  | -2.45728000 | 0.43648900  |
| C  | 2.54010500  | -1.45049000 | 0.09280800  |
| C  | 0.99801700  | -3.71454400 | 0.16680700  |
| C  | 3.14072800  | -2.67693500 | -0.19457700 |
| H  | 3.14307300  | -0.55127600 | 0.07113700  |
| H  | 0.38981600  | -4.61062400 | 0.19029800  |
| H  | 4.19343000  | -2.70107100 | -0.45026400 |
| C  | 2.35338800  | -3.82637700 | -0.15588200 |
| C  | 2.88978400  | -5.19566500 | -0.44369900 |
| O  | 4.19554800  | -5.17743800 | -0.76961900 |
| O  | 2.22273000  | -6.20645300 | -0.38522900 |
| H  | 4.45611300  | -6.10062900 | -0.94931400 |
| C  | -4.24029000 | -3.96368700 | 1.29424700  |
| O  | -5.44485900 | -3.52256700 | 1.69730900  |
| O  | -3.99357100 | -5.12353200 | 1.04253400  |
| H  | -6.05346800 | -4.28333400 | 1.64607100  |
| C  | 1.91859200  | 1.26143300  | 2.88051400  |
| C  | 0.30821600  | -0.19183900 | 3.73630500  |
| C  | 2.46834400  | 1.44079900  | 4.15108900  |
| C  | 0.80537100  | -0.05585800 | 5.03077100  |
| H  | -0.54965700 | -0.81868600 | 3.52157100  |
| H  | 3.32566000  | 2.08991500  | 4.28718000  |
| H  | 0.33557200  | -0.59051500 | 5.84902200  |
| C  | 2.04106600  | 2.02661600  | -0.67179100 |
| C  | 2.42353600  | 1.91526000  | 1.65595700  |
| C  | 3.11093800  | 2.90975400  | -0.83583500 |
| C  | 3.49937000  | 2.79327000  | 1.55166600  |
| H  | 3.40752100  | 3.25131200  | -1.81805600 |
| H  | 4.08270400  | 3.07062300  | 2.42166700  |
| C  | 1.15064400  | 1.48632200  | -1.71239800 |
| C  | -0.74917700 | 0.16852900  | -2.07122700 |

|    |             |             |             |
|----|-------------|-------------|-------------|
| C  | 1.29231700  | 1.71590900  | -3.07739700 |
| C  | -0.67439900 | 0.38115700  | -3.44949100 |
| H  | -1.54082900 | -0.44760800 | -1.66003900 |
| H  | 2.12992900  | 2.29577400  | -3.44510200 |
| H  | -1.42849200 | -0.07360100 | -4.08260500 |
| C  | 0.36296300  | 1.15691800  | -3.95746600 |
| C  | 3.83930800  | 3.28438300  | 0.28861000  |
| C  | 1.90619400  | 0.77357200  | 5.23731700  |
| H  | 0.45995600  | 1.32393700  | -5.02579200 |
| H  | 4.70048700  | 3.93233000  | 0.17351600  |
| H  | 2.32429500  | 0.90170400  | 6.23102000  |
| Cl | -4.28041100 | -1.20792800 | -1.96108400 |
| O  | -4.74253000 | -0.97239000 | -3.35054500 |
| O  | -5.26650800 | -2.01810600 | -1.18849300 |
| O  | -4.07144700 | 0.11414200  | -1.25963400 |
| O  | -2.95474200 | -1.93332200 | -1.98007400 |
| Cl | 5.34882700  | 0.44714300  | -1.43352200 |
| O  | 5.06321200  | 0.30273800  | 0.04559000  |
| O  | 4.04194300  | 0.29089600  | -2.17215300 |
| O  | 6.30125700  | -0.60586300 | -1.86051500 |
| O  | 5.89534800  | 1.81293400  | -1.69168500 |
| C  | -4.46445300 | 5.57957500  | 0.46020800  |
| C  | -3.09191800 | 5.35437100  | 0.34904400  |
| C  | -2.61348500 | 4.15043500  | -0.19227300 |
| C  | -3.53582700 | 3.17824600  | -0.61941000 |
| C  | -4.90419100 | 3.40583600  | -0.50634700 |
| C  | -5.37336300 | 4.60648800  | 0.03733600  |
| H  | -4.82358200 | 6.52119700  | 0.86726600  |
| H  | -2.39412900 | 6.13437100  | 0.64302300  |
| H  | -3.19521500 | 2.23290300  | -1.03173600 |
| H  | -5.59213400 | 2.63472200  | -0.83964500 |
| H  | -6.44157800 | 4.78490000  | 0.12614800  |
| C  | -1.15707500 | 3.85758700  | -0.30412900 |
| H  | -0.98834300 | 2.76550800  | 0.31590800  |
| H  | -0.82574900 | 3.61609800  | -1.31846600 |
| O  | -0.26361900 | 4.78574400  | 0.22524100  |
| H  | -0.58792900 | 5.04340700  | 1.10428600  |

**<sup>3</sup>IH**

Zero-point correction= 0.591039 (Hartree/Particle)  
 Thermal correction to Energy= 0.642425  
 Thermal correction to Enthalpy= 0.643369  
 Thermal correction to Gibbs Free Energy= 0.496576  
 Sum of electronic and zero-point Energies= -3681.341565  
 Sum of electronic and thermal Energies= -3681.290179  
 Sum of electronic and thermal Enthalpies= -3681.289235  
 Sum of electronic and thermal Free Energies= -3681.4360

|    |             |             |             |
|----|-------------|-------------|-------------|
| Fe | 0.30667100  | -0.36310600 | -0.69366900 |
| N  | 1.68157900  | -1.08413500 | 0.62971100  |
| N  | -0.01698800 | -2.23448000 | -0.92345200 |
| N  | -1.21534500 | -0.26046800 | -1.96753200 |
| N  | 0.64300100  | 1.57164300  | -0.30699000 |
| N  | -1.03287900 | -0.07599500 | 0.80245800  |
| O  | 1.55398200  | -0.32794000 | -2.04413400 |
| C  | 1.52516300  | 2.33488200  | -0.97183900 |
| C  | -0.09427900 | 2.11167000  | 0.69546600  |
| C  | 1.73319600  | 3.67073500  | -0.65012500 |
| H  | 2.04408600  | 1.83807900  | -1.78254800 |
| C  | 0.08379400  | 3.43665300  | 1.08564300  |
| H  | 2.43163800  | 4.26790600  | -1.22281800 |
| H  | -0.50579400 | 3.88342000  | 1.87524400  |
| C  | 1.00355500  | 4.22729200  | 0.40198200  |
| C  | -1.06574000 | 1.18923400  | 1.29927500  |
| C  | -1.88378600 | -1.00091600 | 1.27299700  |
| C  | -1.97654700 | 1.54793000  | 2.28802800  |



|    |              |              |              |
|----|--------------|--------------|--------------|
| C  | -2.819245000 | -0.708230000 | 2.263751000  |
| H  | -1.832277000 | -2.005937000 | 0.873930000  |
| H  | -2.030814000 | 2.559803000  | 2.668647000  |
| H  | -3.489554000 | -1.489985000 | 2.600706000  |
| C  | -2.864751000 | 0.587670000  | 2.777013000  |
| C  | -3.828188000 | 1.008255000  | 3.845860000  |
| O  | -4.696039000 | 0.029954000  | 4.165692000  |
| O  | -3.819672000 | 2.102014000  | 4.366894000  |
| H  | -5.285527000 | 0.388589000  | 4.855898000  |
| C  | 1.144703000  | 5.656376000  | 0.828011000  |
| O  | 1.870790000  | 6.381120000  | -0.046605000 |
| O  | 0.680025000  | 6.101407000  | 1.852740000  |
| H  | 1.875941000  | 7.297252000  | 0.289689000  |
| C  | 1.738942000  | -2.447842000 | 0.631786000  |
| C  | 2.532446000  | -0.388787000 | 1.396610000  |
| C  | 2.657416000  | -3.126182000 | 1.427898000  |
| C  | 3.480156000  | -1.006570000 | 2.208353000  |
| H  | 2.445807000  | 0.690042000  | 1.352285000  |
| H  | 2.685610000  | -4.209642000 | 1.423695000  |
| H  | 4.157841000  | -0.402458000 | 2.800612000  |
| C  | -0.994126000 | -2.618621000 | -1.764200000 |
| C  | 0.772815000  | -3.106130000 | -0.266664000 |
| C  | -1.199810000 | -3.976541000 | -2.013300000 |
| C  | 0.608509000  | -4.473521000 | -0.477905000 |
| H  | -2.007839000 | -4.311092000 | -2.649469000 |
| H  | 1.220212000  | -5.196664000 | 0.047896000  |
| C  | -1.737910000 | -1.474792000 | -2.313748000 |
| C  | -1.790475000 | 0.867058000  | -2.406017000 |
| C  | -2.886739000 | -1.566308000 | -3.091385000 |
| C  | -2.941848000 | 0.838640000  | -3.196420000 |
| H  | -1.339989000 | 1.814193000  | -2.127844000 |
| H  | -3.318422000 | -2.536145000 | -3.305792000 |
| H  | -3.381788000 | 1.782980000  | -3.499046000 |
| C  | -3.499205000 | -0.390561000 | -3.532865000 |
| C  | -0.389265000 | -4.899822000 | -1.357246000 |
| C  | 3.544663000  | -2.397479000 | 2.221387000  |
| H  | -4.408960000 | -0.443541000 | -4.122824000 |
| H  | -0.565501000 | -5.959278000 | -1.502191000 |
| H  | 4.274564000  | -2.911347000 | 2.838150000  |
| Cl | -2.284873000 | 4.289261000  | -1.303186000 |
| O  | -3.383439000 | 4.616731000  | -2.246798000 |
| O  | -1.900256000 | 5.468283000  | -0.477040000 |
| O  | -1.073078000 | 3.823674000  | -2.084036000 |
| O  | -2.709307000 | 3.157984000  | -0.399962000 |
| Cl | -3.458623000 | -4.308403000 | 0.451111000  |
| O  | -2.165213000 | -4.062293000 | 1.197445000  |
| O  | -3.693350000 | -3.126261000 | -0.457927000 |
| O  | -4.575090000 | -4.437601000 | 1.416247000  |
| O  | -3.312229000 | -5.541104000 | -0.380706000 |
| C  | 7.629742000  | -2.157366000 | 0.535324000  |
| C  | 6.427632000  | -1.905948000 | -0.111944000 |
| C  | 6.020589000  | -0.568545000 | -0.389024000 |
| C  | 6.887246000  | 0.487091000  | 0.016213000  |
| C  | 8.082527000  | 0.217960000  | 0.664181000  |
| C  | 8.466974000  | -1.105243000 | 0.932643000  |
| H  | 7.927079000  | -3.185142000 | 0.730574000  |
| H  | 5.788571000  | -2.723298000 | -0.429124000 |
| H  | 6.601490000  | 1.516084000  | -0.192496000 |
| H  | 8.728214000  | 1.040204000  | 0.962134000  |
| H  | 9.406563000  | -1.311410000 | 1.436801000  |
| C  | 4.795901000  | -0.278424000 | -1.026248000 |
| H  | 1.221415000  | -0.775961000 | -2.839353000 |
| H  | 4.503878000  | 0.746906000  | -1.246965000 |
| O  | 3.975154000  | -1.264499000 | -1.432472000 |
| H  | 3.101432000  | -0.886787000 | -1.730112000 |

<sup>5</sup>TS

|                                                    |              |              |              |
|----------------------------------------------------|--------------|--------------|--------------|
| Zero-point correction= 0.585828 (Hartree/Particle) |              |              |              |
| Thermal correction to Energy= 0.637981             |              |              |              |
| Thermal correction to Enthalpy= 0.638926           |              |              |              |
| Thermal correction to Gibbs Free Energy= 0.488184  |              |              |              |
| Sum of electronic and zero-point Energies=         | -            | 3681.298978  |              |
| Sum of electronic and thermal Energies=            | -            | 3681.246825  |              |
| Sum of electronic and thermal Enthalpies=          | -            | 3681.245881  |              |
| Sum of electronic and thermal Free Energies=       | -            | 3681.3966    |              |
| Fe                                                 | -0.277652000 | -0.686822000 | 0.767286000  |
| N                                                  | -1.875925000 | -0.486442000 | 2.252214000  |
| N                                                  | -1.918612000 | -1.825426000 | 0.000369000  |
| N                                                  | 0.321594000  | -1.319978000 | -1.243429000 |
| N                                                  | 1.052899000  | 0.871554000  | 1.436784000  |
| N                                                  | -0.972820000 | 1.177948000  | -0.238184000 |
| O                                                  | 0.572655000  | -1.915603000 | 1.580890000  |
| C                                                  | 2.049026000  | 0.624563000  | 2.302655000  |
| C                                                  | 0.974877000  | 2.079341000  | 0.830003000  |
| C                                                  | 3.019389000  | 1.567817000  | 2.613227000  |
| H                                                  | 2.054595000  | -0.371606000 | 2.729079000  |
| C                                                  | 1.926397000  | 3.067528000  | 1.080550000  |
| H                                                  | 3.819493000  | 1.329877000  | 3.302719000  |
| H                                                  | 1.904571000  | 4.024026000  | 0.575198000  |
| C                                                  | 2.962433000  | 2.807824000  | 1.974386000  |
| C                                                  | -0.175716000 | 2.263828000  | -0.080245000 |
| C                                                  | -2.068757000 | 1.269352000  | -1.001425000 |
| C                                                  | -0.461220000 | 3.468907000  | -0.716255000 |
| C                                                  | -2.427951000 | 2.448097000  | -1.657997000 |
| H                                                  | -2.704415000 | 0.397224000  | -1.089985000 |
| H                                                  | 0.171324000  | 4.340811000  | -0.607412000 |
| H                                                  | -3.338588000 | 2.474432000  | -2.243261000 |
| C                                                  | -1.603081000 | 3.561126000  | -1.518216000 |
| C                                                  | -1.891587000 | 4.877460000  | -2.171839000 |
| O                                                  | -2.965906000 | 4.824846000  | -2.983690000 |
| O                                                  | -1.234646000 | 5.880134000  | -1.991502000 |
| H                                                  | -3.083093000 | 5.721157000  | -3.351394000 |
| C                                                  | 3.984882000  | 3.881899000  | 2.187122000  |
| O                                                  | 5.018155000  | 3.463005000  | 2.945298000  |
| O                                                  | 3.883721000  | 5.004693000  | 1.746802000  |
| H                                                  | 5.647294000  | 4.207581000  | 2.989548000  |
| C                                                  | -3.019420000 | -1.159390000 | 1.995471000  |
| C                                                  | -1.797505000 | 0.301470000  | 3.331890000  |
| C                                                  | -4.139097000 | -1.025265000 | 2.820160000  |
| C                                                  | -2.861241000 | 0.461441000  | 4.214569000  |
| H                                                  | -0.853788000 | 0.816256000  | 3.481128000  |
| H                                                  | -5.076603000 | -1.489880000 | 2.543347000  |
| H                                                  | -2.757385000 | 1.111139000  | 5.076979000  |
| C                                                  | -1.777989000 | -2.461757000 | -1.173902000 |
| C                                                  | -3.000855000 | -1.997902000 | 0.774263000  |
| C                                                  | -2.754552000 | -3.361886000 | -1.608597000 |
| C                                                  | -4.004843000 | -2.896009000 | 0.403972000  |
| H                                                  | -2.651456000 | -3.881950000 | -2.553567000 |
| H                                                  | -4.886292000 | -3.031482000 | 1.013582000  |
| C                                                  | -0.543317000 | -2.114769000 | -1.915684000 |
| C                                                  | 1.471821000  | -0.942133000 | -1.810385000 |
| C                                                  | -0.262123000 | -2.536303000 | -3.215108000 |
| C                                                  | 1.813767000  | -1.320099000 | -3.110923000 |
| H                                                  | 2.141392000  | -0.336328000 | -1.209682000 |
| H                                                  | -0.963898000 | -3.160737000 | -3.756279000 |
| H                                                  | 2.753506000  | -0.971222000 | -3.524947000 |
| C                                                  | 0.929279000  | -2.126256000 | -3.819652000 |
| C                                                  | -3.867818000 | -3.579854000 | -0.801298000 |
| C                                                  | -4.054166000 | -0.207973000 | 3.943084000  |
| H                                                  | 1.155326000  | -2.438061000 | -4.835084000 |
| H                                                  | -4.642015000 | -4.270361000 | -1.119587000 |
| H                                                  | -4.919000000 | -0.079442000 | 4.586472000  |

|    |              |              |              |
|----|--------------|--------------|--------------|
| Cl | 4.199170000  | 1.424227000  | -1.237843000 |
| O  | 4.903614000  | 0.684342000  | -2.326728000 |
| O  | 5.071054000  | 2.470844000  | -0.640845000 |
| O  | 3.806576000  | 0.435658000  | -0.155854000 |
| O  | 2.938315000  | 2.036487000  | -1.772719000 |
| Cl | -5.599752000 | 0.199038000  | -0.470166000 |
| O  | -6.640085000 | 1.056923000  | -1.081720000 |
| O  | -4.738151000 | 1.002821000  | 0.465282000  |
| O  | -4.711591000 | -0.380969000 | -1.545096000 |
| O  | -6.231964000 | -0.926661000 | 0.298716000  |
| C  | 3.990513000  | -5.168960000 | -1.271061000 |
| C  | 3.287402000  | -5.052446000 | -0.074437000 |
| C  | 3.304566000  | -3.837699000 | 0.632792000  |
| C  | 4.013412000  | -2.741857000 | 0.106095000  |
| C  | 4.699127000  | -2.855773000 | -1.100081000 |
| C  | 4.693988000  | -4.073942000 | -1.788063000 |
| H  | 3.991471000  | -6.115941000 | -1.804525000 |
| H  | 2.739262000  | -5.895964000 | 0.330956000  |
| H  | 4.016668000  | -1.784522000 | 0.618587000  |
| H  | 5.214441000  | -1.987276000 | -1.500138000 |
| H  | 5.233897000  | -4.170184000 | -2.726404000 |
| C  | 2.553962000  | -3.661292000 | 1.900980000  |
| H  | 3.132925000  | -3.101892000 | 2.655396000  |
| H  | 1.656176000  | -2.907448000 | 1.680323000  |
| O  | 2.035157000  | -4.857828000 | 2.396121000  |
| H  | 1.586244000  | -4.674028000 | 3.235436000  |

**<sup>5</sup>IH(P+S)**

Zero-point correction= 0.465985 (Hartree/Particle)

Thermal correction to Energy= 0.510438

Thermal correction to Enthalpy= 0.511382

Thermal correction to Gibbs Free Energy= 0.380597

Sum of electronic and zero-point Energies= -3335.31085

Sum of electronic and thermal Energies= -3335.266406

Sum of electronic and thermal Enthalpies= -3335.265462

Sum of electronic and thermal Free Energies= -3335.3962

|    |              |              |              |
|----|--------------|--------------|--------------|
| Fe | -0.237738000 | 1.192864000  | -1.030450000 |
| N  | -1.602795000 | 0.161066000  | -2.384610000 |
| N  | -2.208421000 | 1.690010000  | -0.348727000 |
| N  | 0.036418000  | 2.384011000  | 0.788589000  |
| N  | 1.626043000  | 0.209136000  | -1.512954000 |
| N  | -0.131813000 | -0.597902000 | 0.296298000  |
| O  | 0.119633000  | 2.596256000  | -2.152983000 |
| C  | 2.470281000  | 0.714474000  | -2.430826000 |
| C  | 2.005663000  | -0.849553000 | -0.760462000 |
| C  | 3.733791000  | 0.183759000  | -2.649640000 |
| H  | 2.099578000  | 1.573774000  | -2.977747000 |
| C  | 3.260052000  | -1.434222000 | -0.930218000 |
| H  | 4.397192000  | 0.626104000  | -3.382121000 |
| H  | 3.593695000  | -2.260517000 | -0.316922000 |
| C  | 4.135513000  | -0.907372000 | -1.875678000 |
| C  | 1.009974000  | -1.324813000 | 0.223159000  |
| C  | -1.106116000 | -0.980068000 | 1.133004000  |
| C  | 1.199491000  | -2.453007000 | 1.015872000  |
| C  | -0.991833000 | -2.104810000 | 1.950182000  |
| H  | -2.021049000 | -0.401694000 | 1.150496000  |
| H  | 2.110683000  | -3.035749000 | 0.976722000  |
| H  | -1.818808000 | -2.383771000 | 2.590978000  |
| C  | 0.185214000  | -2.847089000 | 1.892794000  |
| C  | 0.414062000  | -4.076845000 | 2.716801000  |
| O  | -0.583358000 | -4.300768000 | 3.594982000  |
| O  | 1.385305000  | -4.793373000 | 2.606191000  |
| H  | -0.355774000 | -5.119983000 | 4.073956000  |
| C  | 5.487776000  | -1.540084000 | -2.000053000 |
| O  | 6.314353000  | -0.830027000 | -2.795053000 |
| O  | 5.797745000  | -2.579857000 | -1.464154000 |

|    |              |              |              |
|----|--------------|--------------|--------------|
| H  | 7.172120000  | -1.295341000 | -2.786808000 |
| C  | -2.925588000 | 0.340092000  | -2.163959000 |
| C  | -1.197266000 | -0.674621000 | -3.350746000 |
| C  | -3.883313000 | -0.358236000 | -2.901937000 |
| C  | -2.094256000 | -1.379236000 | -4.146872000 |
| H  | -0.124362000 | -0.775006000 | -3.478147000 |
| H  | -4.931423000 | -0.279852000 | -2.643112000 |
| H  | -1.725674000 | -2.046424000 | -4.918447000 |
| C  | -2.350254000 | 2.511076000  | 0.705991000  |
| C  | -3.261028000 | 1.290051000  | -1.080123000 |
| C  | -3.611298000 | 3.000309000  | 1.054860000  |
| C  | -4.545262000 | 1.760401000  | -0.794937000 |
| H  | -3.736058000 | 3.663621000  | 1.902577000  |
| H  | -5.398770000 | 1.438079000  | -1.373059000 |
| C  | -1.086275000 | 2.823700000  | 1.409904000  |
| C  | 1.240997000  | 2.606747000  | 1.330224000  |
| C  | -1.007801000 | 3.500186000  | 2.626131000  |
| C  | 1.389371000  | 3.267859000  | 2.552166000  |
| H  | 2.110356000  | 2.254130000  | 0.780307000  |
| H  | -1.908352000 | 3.835736000  | 3.127850000  |
| H  | 2.388171000  | 3.388427000  | 2.958131000  |
| C  | 0.246285000  | 3.716566000  | 3.205326000  |
| C  | -4.709382000 | 2.621779000  | 0.286702000  |
| C  | -3.459279000 | -1.223899000 | -3.905689000 |
| H  | 0.318908000  | 4.226454000  | 4.161396000  |
| H  | -5.699875000 | 2.985320000  | 0.539792000  |
| H  | -4.188933000 | -1.786357000 | -4.479790000 |
| Cl | 4.392793000  | 0.982450000  | 1.377820000  |
| O  | 4.727228000  | 1.974491000  | 2.437721000  |
| O  | 5.560403000  | 0.125931000  | 1.041225000  |
| O  | 3.949571000  | 1.723309000  | 0.131182000  |
| O  | 3.241237000  | 0.127347000  | 1.835818000  |
| Cl | -4.758565000 | -1.482897000 | 0.635011000  |
| O  | -5.354323000 | -2.586647000 | 1.420706000  |
| O  | -3.632753000 | -1.994759000 | -0.222707000 |
| O  | -4.200246000 | -0.430114000 | 1.562526000  |
| O  | -5.793158000 | -0.849913000 | -0.252841000 |
| H  | 0.531423000  | 3.408071000  | -1.815421000 |

Zero-point correction= 0.119898 (Hartree/Particle)

Thermal correction to Energy= 0.126880

Thermal correction to Enthalpy= 0.127824

Thermal correction to Gibbs Free Energy= 0.088302

Sum of electronic and zero-point Energies= -346.010999

Sum of electronic and thermal Energies= -346.004018

Sum of electronic and thermal Enthalpies= -346.003073

Sum of electronic and thermal Free Energies= -346.0425

|   |              |              |              |
|---|--------------|--------------|--------------|
| C | -1.343803000 | 1.346481000  | -0.000020000 |
| C | 0.017826000  | 1.082791000  | 0.000046000  |
| C | 0.493815000  | -0.260207000 | 0.000051000  |
| C | -0.471350000 | -1.308157000 | 0.000039000  |
| C | -1.827708000 | -1.025231000 | -0.000016000 |
| C | -2.279847000 | 0.302750000  | -0.000039000 |
| H | -1.686864000 | 2.378359000  | -0.000006000 |
| H | 0.736741000  | 1.895316000  | 0.000111000  |
| H | -0.130582000 | -2.341342000 | 0.000080000  |
| H | -2.545317000 | -1.841999000 | -0.000008000 |
| H | -3.344166000 | 0.519597000  | -0.000116000 |
| C | 1.866142000  | -0.567718000 | -0.000039000 |
| H | 2.230564000  | -1.590915000 | -0.000048000 |
| O | 2.791288000  | 0.437989000  | -0.000028000 |
| H | 3.678867000  | 0.052807000  | -0.000026000 |

**1+EB**

**<sup>3</sup>TS**

Zero-point correction= 0.609221 (Hartree/Particle)

Thermal correction to Energy= 0.660864

Thermal correction to Enthalpy= 0.661808  
 Thermal correction to Gibbs Free Energy= 0.514101  
 Sum of electronic and zero-point Energies= -3615.835390  
 Sum of electronic and thermal Energies= -3615.783748  
 Sum of electronic and thermal Enthalpies= -3615.782803  
 Sum of electronic and thermal Free Energies= -3615.9305

|    |              |              |              |
|----|--------------|--------------|--------------|
| Ru | 0.313009000  | -0.599524000 | 0.284785000  |
| N  | -0.267508000 | -0.925823000 | -1.717777000 |
| N  | 1.747269000  | -1.872171000 | -0.326567000 |
| N  | 1.524896000  | -0.739840000 | 2.054401000  |
| N  | -1.076592000 | 0.906123000  | 0.904227000  |
| N  | 1.279064000  | 1.273032000  | -0.281012000 |
| O  | -0.817008000 | -1.937260000 | 0.964757000  |
| C  | -2.262759000 | 0.626278000  | 1.468308000  |
| C  | -0.721853000 | 2.200815000  | 0.683361000  |
| C  | -3.152390000 | 1.620942000  | 1.861454000  |
| H  | -2.487292000 | -0.427290000 | 1.585792000  |
| C  | -1.563625000 | 3.241906000  | 1.067391000  |
| H  | -4.114324000 | 1.353908000  | 2.276942000  |
| H  | -1.301852000 | 4.279357000  | 0.901144000  |
| C  | -2.788937000 | 2.952194000  | 1.665749000  |
| C  | 0.586492000  | 2.404436000  | 0.031418000  |
| C  | 2.485029000  | 1.368786000  | -0.862174000 |
| C  | 1.112276000  | 3.661530000  | -0.258025000 |
| C  | 3.069355000  | 2.596827000  | -1.167555000 |
| H  | 3.024612000  | 0.452337000  | -1.070598000 |
| H  | 0.575311000  | 4.572258000  | -0.023764000 |
| H  | 4.056133000  | 2.619657000  | -1.612695000 |
| C  | 2.366887000  | 3.761202000  | -0.864634000 |
| C  | 2.898669000  | 5.132470000  | -1.143978000 |
| O  | 4.087392000  | 5.104616000  | -1.777421000 |
| O  | 2.324736000  | 6.155142000  | -0.835958000 |
| H  | 4.359645000  | 6.032996000  | -1.905447000 |
| C  | -3.667407000 | 4.101835000  | 2.045295000  |
| O  | -4.824840000 | 3.703630000  | 2.607725000  |
| O  | -3.366890000 | 5.264559000  | 1.877288000  |
| H  | -5.342883000 | 4.511878000  | 2.782370000  |
| C  | 0.547986000  | -1.813350000 | -2.373559000 |
| C  | -1.316108000 | -0.387450000 | -2.358437000 |
| C  | 0.297642000  | -2.159934000 | -3.699574000 |
| C  | -1.622713000 | -0.714485000 | -3.681564000 |
| H  | -1.931623000 | 0.320624000  | -1.811472000 |
| H  | 0.952101000  | -2.855661000 | -4.212485000 |
| H  | -2.508868000 | -0.272984000 | -4.122279000 |
| C  | 2.700833000  | -2.232263000 | 0.558941000  |
| C  | 1.674999000  | -2.354817000 | -1.584915000 |
| C  | 3.656558000  | -3.176031000 | 0.182952000  |
| C  | 2.623411000  | -3.289375000 | -2.008367000 |
| H  | 4.447693000  | -3.467392000 | 0.857909000  |
| H  | 2.599470000  | -3.690203000 | -3.014749000 |
| C  | 2.605418000  | -1.553706000 | 1.874199000  |
| C  | 1.361353000  | -0.108860000 | 3.223855000  |
| C  | 3.561895000  | -1.706077000 | 2.877533000  |
| C  | 2.264602000  | -0.242221000 | 4.275370000  |
| H  | 0.479604000  | 0.516790000  | 3.306077000  |
| H  | 4.458458000  | -2.281790000 | 2.687511000  |
| H  | 2.091829000  | 0.289220000  | 5.204931000  |
| C  | 3.387842000  | -1.044758000 | 4.090690000  |
| C  | 3.609377000  | -3.694723000 | -1.111504000 |
| C  | -0.802379000 | -1.608365000 | -4.360481000 |
| H  | 4.132057000  | -1.145370000 | 4.874283000  |
| H  | 4.361067000  | -4.411027000 | -1.425999000 |
| H  | -1.009856000 | -1.882022000 | -5.390495000 |
| Cl | 5.674166000  | -0.263852000 | 0.014610000  |
| Cl | -4.594280000 | 1.275609000  | -1.629003000 |

|   |              |              |              |
|---|--------------|--------------|--------------|
| O | -5.466008000 | 2.235903000  | -2.342111000 |
| O | -5.185349000 | 0.903112000  | -0.303316000 |
| O | -4.404740000 | 0.027107000  | -2.451100000 |
| O | -3.232512000 | 1.893986000  | -1.398882000 |
| O | 6.869831000  | 0.542462000  | -0.317944000 |
| O | 4.916182000  | -0.608226000 | -1.246473000 |
| O | 6.070567000  | -1.536723000 | 0.706238000  |
| O | 4.751228000  | 0.511306000  | 0.916023000  |
| C | -3.465306000 | -3.517326000 | 0.321776000  |
| C | -4.358658000 | -2.474681000 | -0.017567000 |
| C | -5.547877000 | -2.293976000 | 0.681952000  |
| C | -5.879849000 | -3.156426000 | 1.732263000  |
| C | -5.008903000 | -4.195290000 | 2.081392000  |
| C | -3.811898000 | -4.370000000 | 1.393417000  |
| H | -4.124806000 | -1.800368000 | -0.837755000 |
| H | -6.198969000 | -1.471616000 | 0.402779000  |
| H | -6.810181000 | -3.020593000 | 2.277485000  |
| H | -5.265163000 | -4.869315000 | 2.895044000  |
| H | -3.144918000 | -5.177125000 | 1.681406000  |
| C | -2.190119000 | -3.630585000 | -0.400003000 |
| H | -2.236529000 | -3.182490000 | -1.397077000 |
| H | -1.423753000 | -2.741628000 | 0.230853000  |
| C | -1.392002000 | -4.920785000 | -0.357264000 |
| H | -0.454651000 | -4.815721000 | -0.914436000 |
| H | -1.135721000 | -5.213518000 | 0.666644000  |
| H | -1.954714000 | -5.750863000 | -0.807596000 |

### <sup>3</sup>H

Zero-point correction= 0.612559 (Hartree/Particle)  
 Thermal correction to Energy= 0.665345  
 Thermal correction to Enthalpy= 0.666289  
 Thermal correction to Gibbs Free Energy= 0.515178  
 Sum of electronic and zero-point Energies= -3615.851867  
 Sum of electronic and thermal Energies= -3615.799082  
 Sum of electronic and thermal Enthalpies= -3615.798137  
 Sum of electronic and thermal Free Energies= -3615.9492

|    |              |              |              |
|----|--------------|--------------|--------------|
| Ru | 0.277817000  | -0.481075000 | 0.337572000  |
| N  | -0.302330000 | -0.908157000 | -1.642934000 |
| N  | 1.625317000  | -1.888397000 | -0.172394000 |
| N  | 1.487101000  | -0.559520000 | 2.111068000  |
| N  | -1.042259000 | 1.088224000  | 0.902220000  |
| N  | 1.289130000  | 1.287855000  | -0.361335000 |
| O  | -0.982450000 | -1.761491000 | 1.053849000  |
| C  | -2.223970000 | 0.881249000  | 1.502263000  |
| C  | -0.637328000 | 2.355255000  | 0.614020000  |
| C  | -3.056289000 | 1.932801000  | 1.877330000  |
| H  | -2.491856000 | -0.157771000 | 1.656813000  |
| C  | -1.420148000 | 3.448375000  | 0.974031000  |
| H  | -4.017853000 | 1.727215000  | 2.327137000  |
| H  | -1.118506000 | 4.465563000  | 0.757191000  |
| C  | -2.639290000 | 3.237032000  | 1.618650000  |
| C  | 0.656661000  | 2.465172000  | -0.086015000 |
| C  | 2.474921000  | 1.296222000  | -0.990682000 |
| C  | 1.227021000  | 3.679128000  | -0.461430000 |
| C  | 3.099822000  | 2.478931000  | -1.381639000 |
| H  | 2.963047000  | 0.344343000  | -1.164831000 |
| H  | 0.739201000  | 4.624427000  | -0.258595000 |
| H  | 4.069231000  | 2.435043000  | -1.862015000 |
| C  | 2.461208000  | 3.688445000  | -1.115961000 |
| C  | 3.042233000  | 5.017650000  | -1.487504000 |
| O  | 4.203997000  | 4.901865000  | -2.159609000 |
| O  | 2.525420000  | 6.079961000  | -1.215176000 |
| H  | 4.512199000  | 5.808653000  | -2.347290000 |
| C  | -3.453297000 | 4.439795000  | 1.976370000  |
| O  | -4.613767000 | 4.117667000  | 2.580183000  |

|    |              |              |              |
|----|--------------|--------------|--------------|
| O  | -3.103858000 | 5.580443000  | 1.758239000  |
| H  | -5.087450000 | 4.955689000  | 2.739853000  |
| C  | 0.455106000  | -1.889791000 | -2.231182000 |
| C  | -1.317849000 | -0.351571000 | -2.320874000 |
| C  | 0.188180000  | -2.304435000 | -3.534484000 |
| C  | -1.641022000 | -0.746795000 | -3.620988000 |
| H  | -1.894023000 | 0.421679000  | -1.819907000 |
| H  | 0.799017000  | -3.071913000 | -3.996260000 |
| H  | -2.500732000 | -0.287440000 | -4.094296000 |
| C  | 2.547068000  | -2.251083000 | 0.745238000  |
| C  | 1.534076000  | -2.452027000 | -1.394773000 |
| C  | 3.436798000  | -3.282867000 | 0.448634000  |
| C  | 2.417774000  | -3.478290000 | -1.741216000 |
| H  | 4.198130000  | -3.581983000 | 1.154041000  |
| H  | 2.374190000  | -3.943477000 | -2.718897000 |
| C  | 2.498411000  | -1.469710000 | 2.004549000  |
| C  | 1.372692000  | 0.176742000  | 3.224277000  |
| C  | 3.432252000  | -1.621220000 | 3.028933000  |
| C  | 2.257315000  | 0.054441000  | 4.291790000  |
| H  | 0.545495000  | 0.877183000  | 3.247091000  |
| H  | 4.275536000  | -2.286774000 | 2.898585000  |
| H  | 2.126877000  | 0.671681000  | 5.173937000  |
| C  | 3.309044000  | -0.852770000 | 4.183481000  |
| C  | 3.363713000  | -3.889460000 | -0.806267000 |
| C  | -0.873077000 | -1.729001000 | -4.236661000 |
| H  | 4.037854000  | -0.953300000 | 4.981487000  |
| H  | 4.064813000  | -4.677636000 | -1.059576000 |
| H  | -1.094480000 | -2.055131000 | -5.248346000 |
| Cl | 5.534981000  | -0.457476000 | 0.000864000  |
| Cl | -4.549732000 | 1.305528000  | -1.529260000 |
| O  | -5.494455000 | 2.250263000  | -2.166008000 |
| O  | -5.032977000 | 0.910171000  | -0.166089000 |
| O  | -4.388216000 | 0.070628000  | -2.373839000 |
| O  | -3.190824000 | 1.959276000  | -1.390535000 |
| O  | 6.748747000  | 0.287537000  | -0.401834000 |
| O  | 4.753946000  | -0.873536000 | -1.224225000 |
| O  | 5.900565000  | -1.684081000 | 0.784379000  |
| O  | 4.643054000  | 0.411590000  | 0.847671000  |
| C  | -3.453085000 | -3.839014000 | 0.121813000  |
| C  | -4.213056000 | -2.642326000 | -0.046856000 |
| C  | -5.214990000 | -2.294412000 | -0.847030000 |
| C  | -5.506946000 | -3.125483000 | 1.938477000  |
| C  | -4.780691000 | -4.310914000 | 2.123015000  |
| C  | -3.772045000 | -4.666260000 | 1.238808000  |
| H  | -4.011315000 | -1.988784000 | -0.892093000 |
| H  | -5.759280000 | -1.368966000 | 0.685427000  |
| H  | -6.294860000 | -2.855426000 | 2.636400000  |
| H  | -5.009373000 | -4.960640000 | 2.964358000  |
| H  | -3.224831000 | -5.591029000 | 1.396897000  |
| C  | -2.420586000 | -4.155110000 | -0.800463000 |
| H  | -2.326264000 | -3.506884000 | -1.670104000 |
| H  | -1.192988000 | -2.523645000 | 0.475488000  |
| C  | -1.597413000 | -5.408161000 | -0.788959000 |
| H  | -0.673024000 | -5.278434000 | -1.363732000 |
| H  | -1.318122000 | -5.720261000 | 0.224595000  |
| H  | -2.135272000 | -6.257171000 | -1.242731000 |

**1'+EB**

**<sup>3</sup>TS**

Zero-point correction= 0.610360 (Hartree/Particle)

Thermal correction to Energy= 0.661721

Thermal correction to Enthalpy= 0.662665

Thermal correction to Gibbs Free Energy= 0.514708

Sum of electronic and zero-point Energies= -3645.384233

Sum of electronic and thermal Energies= -3645.332872

Sum of electronic and thermal Enthalpies= -3645.331928

Sum of electronic and thermal Free Energies= -3645.4798

|    |              |              |              |
|----|--------------|--------------|--------------|
| Fe | 0.008811000  | -0.200079000 | 0.826462000  |
| N  | -0.452500000 | 0.255142000  | 2.767643000  |
| N  | -1.882477000 | -0.453820000 | 0.749699000  |
| N  | -0.154745000 | -0.645835000 | -1.112894000 |
| N  | 1.956846000  | 0.307972000  | 0.882782000  |
| N  | -0.087830000 | 1.821963000  | 0.294446000  |
| O  | 0.351793000  | -1.806010000 | 1.358550000  |
| C  | 2.928478000  | -0.554483000 | 1.216200000  |
| C  | 2.276489000  | 1.578302000  | 0.518822000  |
| C  | 4.274387000  | -0.189756000 | 1.222388000  |
| H  | 2.598069000  | -1.554189000 | -1.461126000 |
| C  | 3.600549000  | 2.004849000  | 0.498189000  |
| H  | 5.033433000  | -0.925891000 | 1.448245000  |
| H  | 3.874173000  | 3.009673000  | 0.200364000  |
| C  | 4.611566000  | 1.110475000  | 0.854340000  |
| C  | 1.123580000  | 2.427226000  | 0.171611000  |
| C  | -1.201075000 | 2.511797000  | 0.009958000  |
| C  | 1.228358000  | 3.749891000  | -0.250700000 |
| C  | -1.170742000 | 3.838113000  | -0.424624000 |
| H  | -2.158480000 | 2.017960000  | 0.117305000  |
| H  | 2.187904000  | 4.241195000  | -0.357601000 |
| H  | -2.103838000 | 4.336458000  | -0.659423000 |
| C  | 0.066639000  | 4.464809000  | -0.556483000 |
| C  | 0.222320000  | 5.882992000  | -1.014170000 |
| O  | -0.958486000 | 6.465419000  | -1.291905000 |
| O  | 1.292835000  | 6.443006000  | -1.118802000 |
| H  | -0.764228000 | 7.374097000  | -1.590280000 |
| C  | 6.026228000  | 1.598231000  | 0.793712000  |
| O  | 6.908043000  | 0.673140000  | 1.211355000  |
| O  | 6.336972000  | 2.710036000  | 0.421916000  |
| H  | 7.797660000  | 1.054940000  | 1.089218000  |
| C  | -1.773731000 | 0.081920000  | 3.041239000  |
| C  | 0.381873000  | 0.617351000  | 3.747605000  |
| C  | -2.275343000 | 0.291003000  | 4.326883000  |
| C  | -0.050801000 | 0.840449000  | 5.053313000  |
| H  | 1.424505000  | 0.723552000  | 3.470336000  |
| H  | -3.331894000 | 0.156875000  | 4.528345000  |
| H  | 0.661887000  | 1.134507000  | 5.816043000  |
| C  | -2.429264000 | -0.797959000 | -0.426610000 |
| C  | -2.594572000 | -0.333341000 | 1.885511000  |
| C  | -3.798517000 | -1.064655000 | -0.500193000 |
| C  | -3.963638000 | -0.585491000 | 1.869104000  |
| H  | -4.270565000 | -1.303447000 | -1.442978000 |
| H  | -4.564002000 | -0.478795000 | 2.764748000  |
| C  | -1.442594000 | -0.840224000 | -1.518888000 |
| C  | 0.837436000  | -0.687737000 | -2.011296000 |
| C  | -1.756775000 | -1.040338000 | -2.859234000 |
| C  | 0.590552000  | -0.917614000 | -3.366812000 |
| H  | 1.853333000  | -0.549769000 | -1.661279000 |
| H  | -2.791821000 | -1.130112000 | -3.164810000 |
| H  | 1.435532000  | -0.957740000 | -4.045266000 |
| C  | -0.722289000 | -1.081662000 | -3.796551000 |
| C  | -4.559765000 | -0.948632000 | 0.658544000  |
| C  | -1.403954000 | 0.676200000  | 5.343501000  |
| H  | -0.948069000 | -1.235161000 | -4.847405000 |
| H  | -5.630798000 | -1.107216000 | 0.609317000  |
| H  | -1.779269000 | 0.843961000  | 6.348309000  |
| Cl | 4.293001000  | -1.961271000 | -1.765821000 |
| O  | 4.483271000  | -2.690000000 | -3.042823000 |
| O  | 5.533074000  | -1.985122000 | -0.936885000 |
| O  | 3.162119000  | -2.587237000 | -0.981367000 |
| O  | 3.914289000  | -0.525038000 | -2.047043000 |
| Cl | -4.638024000 | 2.114631000  | -1.319008000 |
| O  | -4.254527000 | 2.231161000  | 0.139976000  |
| O  | -3.444782000 | 1.572195000  | -2.067512000 |

|   |              |              |              |
|---|--------------|--------------|--------------|
| O | -4.999853000 | 3.452767000  | -1.845508000 |
| O | -5.773734000 | 1.153405000  | -1.448396000 |
| C | -1.034369000 | -4.503096000 | -0.059238000 |
| C | -1.744803000 | -4.477412000 | -1.276988000 |
| C | -3.049229000 | -4.960396000 | -1.362563000 |
| C | -3.683301000 | -5.472376000 | -0.226999000 |
| C | -2.997523000 | -5.500004000 | 0.991830000  |
| C | -1.691803000 | -5.022616000 | 1.075400000  |
| H | -1.250082000 | -4.093908000 | -2.165746000 |
| H | -3.568637000 | -4.949076000 | -2.317446000 |
| H | -4.699218000 | -5.852431000 | -0.291899000 |
| H | -3.482284000 | -5.901568000 | 1.878041000  |
| H | -1.170337000 | -5.052547000 | 2.027641000  |
| C | 0.347478000  | -3.979437000 | 0.005785000  |
| H | 0.757036000  | -3.723010000 | -0.974935000 |
| H | 0.275873000  | -2.823163000 | 0.566090000  |
| C | 1.372647000  | -4.694378000 | 0.871372000  |
| H | 1.487748000  | -5.735716000 | 0.539943000  |
| H | 2.343208000  | -4.202741000 | 0.770393000  |
| H | 1.089342000  | -4.711004000 | 1.929752000  |

### 3IH

Zero-point correction= 0.614417 (Hartree/Particle)

Thermal correction to Energy= 0.666668

Thermal correction to Enthalpy= 0.667613

Thermal correction to Gibbs Free Energy= 0.516614

Sum of electronic and zero-point Energies= -3645.413661

Sum of electronic and thermal Energies= -3645.361410

Sum of electronic and thermal Enthalpies= -3645.360466

Sum of electronic and thermal Free Energies= -3645.5114

|    |              |              |              |
|----|--------------|--------------|--------------|
| Fe | 0.459328000  | -0.131742000 | 0.819867000  |
| N  | 0.481857000  | 0.465883000  | 2.754321000  |
| N  | -1.379415000 | 0.347798000  | 1.007926000  |
| N  | -0.146175000 | -0.543234000 | -1.062878000 |
| N  | 2.426821000  | -0.453411000 | 0.532831000  |
| N  | 1.074581000  | 1.748086000  | 0.190925000  |
| O  | 0.155773000  | -1.772513000 | 1.423634000  |
| C  | 3.030978000  | -1.622772000 | 0.786256000  |
| C  | 3.144250000  | 0.577375000  | 0.006488000  |
| C  | 4.383348000  | -1.835474000 | 0.517096000  |
| H  | 2.413267000  | -2.412696000 | 1.192597000  |
| C  | 4.499780000  | 0.435818000  | -0.273112000 |
| H  | 4.809488000  | -2.813691000 | 0.698248000  |
| H  | 5.085025000  | 1.246775000  | -0.689541000 |
| C  | 5.128375000  | -0.787136000 | -0.016579000 |
| C  | 2.372642000  | 1.813329000  | -0.210877000 |
| C  | 0.288726000  | 2.823954000  | 0.056691000  |
| C  | 2.897449000  | 2.974169000  | -0.769175000 |
| C  | 0.744940000  | 4.019068000  | -0.506736000 |
| H  | -0.740756000 | 2.756640000  | 0.386520000  |
| H  | 3.928205000  | 3.037593000  | -1.096788000 |
| H  | 0.051953000  | 4.844528000  | -0.621756000 |
| C  | 2.070766000  | 4.092068000  | -0.925162000 |
| C  | 2.669950000  | 5.317454000  | -1.544994000 |
| O  | 1.790400000  | 6.330799000  | -1.633581000 |
| O  | 3.821226000  | 5.385932000  | -1.920965000 |
| H  | 2.255615000  | 7.076853000  | -2.057194000 |
| C  | 6.584781000  | -0.902898000 | -0.347012000 |
| O  | 7.086203000  | -2.115463000 | -0.046818000 |
| O  | 7.239210000  | -0.001920000 | -0.826863000 |
| H  | 8.025950000  | -2.106474000 | -0.310316000 |
| C  | -0.749993000 | 0.800715000  | 3.223245000  |
| C  | 1.529999000  | 0.484973000  | 3.584671000  |
| C  | -0.934775000 | 1.184099000  | 4.552876000  |
| C  | 1.416476000  | 0.851669000  | 4.923694000  |

|    |              |              |              |
|----|--------------|--------------|--------------|
| H  | 2.481755000  | 0.189253000  | 3.158158000  |
| H  | -1.921665000 | 1.457372000  | 4.908251000  |
| H  | 2.294238000  | 0.850758000  | 5.560584000  |
| C  | -2.183532000 | 0.188336000  | -0.053963000 |
| C  | -1.827805000 | 0.716068000  | 2.220633000  |
| C  | -3.557092000 | 0.404332000  | 0.080771000  |
| C  | -3.186090000 | 0.957282000  | 2.410782000  |
| H  | -4.228367000 | 0.283572000  | -0.758268000 |
| H  | -3.570038000 | 1.270353000  | 3.374505000  |
| C  | -1.462961000 | -0.250713000 | -1.262484000 |
| C  | 0.580400000  | -1.024957000 | -2.079323000 |
| C  | -2.052429000 | -0.374964000 | -2.516760000 |
| C  | 0.044708000  | -1.194095000 | -3.355763000 |
| H  | 1.596914000  | -1.325837000 | -1.863386000 |
| H  | -3.087858000 | -0.093995000 | -2.658081000 |
| H  | 0.670716000  | -1.602684000 | -4.140924000 |
| C  | -1.283240000 | -0.846774000 | -3.580180000 |
| C  | -4.046581000 | 0.799118000  | 1.322452000  |
| C  | 0.161027000  | 1.210544000  | 5.411913000  |
| H  | -1.724540000 | -0.948274000 | -4.566884000 |
| H  | -5.106108000 | 0.997521000  | 1.436625000  |
| H  | 0.033764000  | 1.504927000  | 6.449108000  |
| Cl | 1.779546000  | -4.352819000 | -0.921698000 |
| O  | 1.569881000  | -5.589375000 | -1.700351000 |
| O  | 2.451507000  | -4.637157000 | 0.384881000  |
| O  | 0.433806000  | -3.699490000 | -0.640286000 |
| O  | 2.615929000  | -3.371773000 | -1.699027000 |
| Cl | -3.088187000 | 3.709774000  | -0.845046000 |
| O  | -2.612787000 | 3.610833000  | 0.588890000  |
| O  | -2.263758000 | 2.752975000  | -1.672067000 |
| O  | -2.884665000 | 5.097215000  | -1.334782000 |
| O  | -4.521468000 | 3.309340000  | -0.912119000 |
| C  | -4.095223000 | -3.315110000 | -0.249082000 |
| C  | -4.335903000 | -3.049179000 | -1.633330000 |
| C  | -5.507733000 | -2.446432000 | -2.065452000 |
| C  | -6.501552000 | -2.077777000 | -1.144587000 |
| C  | -6.296603000 | -2.333868000 | 0.218947000  |
| C  | -5.126611000 | -2.935469000 | 0.663092000  |
| H  | -3.576121000 | -3.342156000 | -2.353911000 |
| H  | -5.662149000 | -2.267692000 | -3.127078000 |
| H  | -7.420759000 | -1.609923000 | -1.484931000 |
| H  | -7.065254000 | -2.062519000 | 0.939072000  |
| H  | -4.994273000 | -3.121688000 | 1.724384000  |
| C  | -2.878610000 | -3.919480000 | 0.146639000  |
| H  | -2.145569000 | -4.125596000 | -0.630343000 |
| H  | 0.246871000  | -2.438941000 | 0.699113000  |
| C  | -2.459593000 | -4.261753000 | 1.539166000  |
| H  | -3.293875000 | -4.299829000 | 2.247117000  |
| H  | -1.953788000 | -5.235142000 | 1.556137000  |
| H  | -1.725630000 | -3.532139000 | 1.915810000  |

### 5TS

Zero-point correction= 0.608627 (Hartree/Particle)

Thermal correction to Energy= 0.661137

Thermal correction to Enthalpy= 0.662081

Thermal correction to Gibbs Free Energy= 0.510956

Sum of electronic and zero-point Energies= -3645.381891

Sum of electronic and thermal Energies= -3645.329381

Sum of electronic and thermal Enthalpies= -3645.328437

Sum of electronic and thermal Free Energies= -3645.4795

|    |              |              |              |
|----|--------------|--------------|--------------|
| Fe | -0.279950000 | -0.720691000 | 0.758923000  |
| N  | -1.874406000 | -0.535183000 | 2.247960000  |
| N  | -1.939672000 | -1.814924000 | -0.036627000 |
| N  | 0.307725000  | -1.314417000 | -1.269105000 |
| N  | 1.069322000  | 0.823947000  | 1.452718000  |

N -0.954231000 1.181271000 -0.216389000  
O 0.560852000 -1.979735000 1.558944000  
C 2.060246000 0.553815000 2.318156000  
C 1.007314000 2.039989000 0.862200000  
C 3.041679000 1.480893000 2.642447000  
H 2.051203000 -0.446296000 2.734907000  
C 1.970639000 3.013558000 1.126882000  
H 3.835895000 1.225018000 3.332393000  
H 1.960668000 3.976918000 0.634449000  
C 3.001107000 2.729784000 2.019481000  
C -0.140947000 2.252598000 -0.045452000  
C -2.050133000 1.300270000 -0.975856000  
C -0.408717000 3.470488000 -0.664926000  
C -2.392755000 2.492944000 -1.615815000  
H -2.699469000 0.439498000 -1.074658000  
H 0.237528000 4.330910000 -0.546168000  
H -3.304109000 2.541066000 -2.198602000  
C -1.550417000 3.591166000 -1.463159000  
C -1.819904000 4.920280000 -2.098490000  
O -2.895964000 4.894882000 -2.909630000  
O -1.148138000 5.910768000 -1.905718000  
H -2.999856000 5.797936000 -3.264571000  
C 4.035739000 3.788483000 2.248833000  
O 5.063022000 3.346977000 3.002969000  
O 3.950794000 4.917872000 1.822013000  
H 5.699244000 4.084615000 3.060723000  
C -3.027188000 -1.186703000 1.977977000  
C -1.781320000 0.220692000 3.349096000  
C -4.141593000 -1.061905000 2.810988000  
C -2.839323000 0.368993000 4.240693000  
H -0.830400000 0.718707000 3.508769000  
H -5.085796000 -1.507775000 2.526252000  
H -2.723464000 0.992313000 5.120838000  
C -1.812997000 -2.417588000 -1.230255000  
C -3.023642000 -1.991351000 0.734178000  
C -2.805205000 -3.288184000 -1.688807000  
C -4.042810000 -2.862106000 0.340412000  
H -2.713350000 -3.780649000 -2.649634000  
H -4.925348000 -3.000563000 0.947693000  
C -0.575358000 -2.067418000 -1.965566000  
C 1.462031000 -0.937670000 -1.828489000  
C -0.309112000 -2.444976000 -3.281566000  
C 1.789738000 -1.271346000 -3.144864000  
H 2.145868000 -0.367529000 -1.208838000  
H -1.025954000 -3.034635000 -3.841758000  
H 2.732621000 -0.921064000 -3.550536000  
C 0.885930000 -2.033208000 -3.877921000  
C -3.919784000 -3.512152000 -0.884830000  
C -4.041691000 -0.277488000 3.955951000  
H 1.099424000 -2.308611000 -4.906562000  
H -4.706267000 -4.179770000 -1.221342000  
H -4.901971000 -0.156697000 4.606895000  
Cl 4.187376000 1.395399000 -1.287069000  
O 4.803504000 0.610455000 -2.400409000  
O 5.132425000 2.408721000 -0.751077000  
O 3.808651000 0.436097000 -0.173952000  
O 2.928170000 2.052632000 -1.768527000  
Cl -5.596933000 0.268593000 -0.449408000  
O -6.625439000 1.160525000 -1.031743000  
O -4.717454000 1.031264000 0.503437000  
O -4.723954000 -0.296463000 -1.544606000  
O -6.244807000 -0.867151000 0.291280000  
C 3.285929000 -3.782979000 0.608130000  
C 3.164428000 -4.996308000 -0.102939000  
C 3.799286000 -5.163860000 -1.329892000  
C 4.545250000 -4.117752000 -1.888554000  
C 4.659404000 -2.899899000 -1.208585000

C 4.042769000 -2.740086000 0.027637000  
H 2.587299000 -5.814708000 0.316398000  
H 3.714126000 -6.111247000 -1.855711000  
H 5.031268000 -4.252022000 -2.851304000  
H 5.205870000 -2.066091000 -1.639865000  
H 4.128313000 -1.782821000 0.532491000  
C 2.618371000 -3.544947000 1.906080000  
H 3.198955000 -2.850649000 2.526522000  
H 1.648815000 -2.844502000 1.667283000  
C 2.086047000 -4.720197000 2.711874000  
H 1.592730000 -4.364541000 3.621595000  
H 1.354267000 -5.307238000 2.147189000  
H 2.900513000 -5.394065000 3.009215000

### <sup>5</sup>IH(P+S)

Zero-point correction= 0.465985 (Hartree/Particle)

Thermal correction to Energy= 0.510437

Thermal correction to Enthalpy=0.511382

Thermal correction to Gibbs Free Energy= 0.380601

Sum of electronic and zero-point Energies= -3335.31085

Sum of electronic and thermal Energies= -3335.266406

Sum of electronic and thermal Enthalpies= -3335.265462

Sum of electronic and thermal Free Energies= -3335.3962

Fe -0.238249000 -1.193352000 1.030046000  
N -1.604095000 -0.162767000 2.384272000  
N -2.208488000 -1.690248000 0.346890000  
N 0.037021000 -2.383091000 -0.789765000  
N 1.625967000 -0.210676000 1.513068000  
N -0.131968000 0.598662000 -0.295103000  
O 0.118530000 -2.597575000 2.151690000  
C 2.470110000 -0.716994000 2.430488000  
C 2.005752000 0.848663000 0.761563000  
C 3.733701000 -0.186679000 2.649813000  
H 2.099246000 -1.576718000 2.976637000  
C 3.260203000 1.433023000 0.931939000  
H 4.397022000 -0.629793000 3.381903000  
H 3.593986000 2.259878000 0.319478000  
C 4.135565000 0.905157000 1.876921000  
C 1.010110000 1.325067000 -0.221544000  
C -1.106267000 0.981931000 -1.131342000  
C 1.200000000 2.453817000 -1.013383000  
C -0.991621000 2.107294000 -1.947609000  
H -2.021504000 0.404032000 -1.149185000  
H 2.111437000 3.036150000 -0.973928000  
H -1.818550000 2.387124000 -2.588088000  
C 0.185758000 2.849019000 -1.889827000  
C 0.414939000 4.079388000 -2.712825000  
O -0.582091000 4.303934000 -3.591290000  
O 1.386149000 4.795820000 -2.601301000  
H -0.354335000 5.123542000 -4.069512000  
C 5.487877000 1.537634000 2.001997000  
O 6.314420000 0.826633000 2.796168000  
O 5.797907000 2.577981000 1.467239000  
H 7.172216000 1.291906000 2.788444000  
C -2.926740000 -0.342097000 2.163015000  
C -1.199180000 0.672386000 3.351126000  
C -3.884974000 0.355403000 2.901125000  
C -2.096696000 1.376124000 4.147430000  
H -0.126348000 0.773064000 3.478951000  
H -4.932955000 0.276895000 2.641802000  
H -1.728638000 2.042896000 4.919614000  
C -2.349671000 -2.510454000 -0.708587000  
C -3.261457000 -1.291372000 1.078349000  
C -3.610402000 -2.999936000 -1.058210000  
C -4.545398000 -1.762105000 0.792469000  
H -3.734636000 -3.662589000 -1.906524000

|    |              |              |              |
|----|--------------|--------------|--------------|
| H  | -5.399183000 | -1.440737000 | 1.370721000  |
| C  | -1.085311000 | -2.822040000 | -1.412285000 |
| C  | 1.241916000  | -2.605120000 | -1.330924000 |
| C  | -1.006082000 | -3.496946000 | -2.629317000 |
| C  | 1.391076000  | -3.264619000 | -2.553658000 |
| H  | 2.110855000  | -2.253212000 | -0.779953000 |
| H  | -1.906329000 | -3.831876000 | -3.132000000 |
| H  | 2.390121000  | -3.384562000 | -2.959209000 |
| C  | 0.248384000  | -3.712487000 | -3.208063000 |
| C  | -4.708845000 | -2.622616000 | -0.289960000 |
| C  | -3.461582000 | 1.220489000  | 3.905643000  |
| H  | 0.321581000  | -4.221085000 | -4.164776000 |
| H  | -5.699096000 | -2.986442000 | -0.543592000 |
| H  | -4.191623000 | 1.782305000  | 4.479880000  |
| Cl | 4.393575000  | -0.980887000 | -1.378828000 |
| O  | 4.728453000  | -1.971543000 | -2.439899000 |
| O  | 5.560398000  | -0.123302000 | -1.042289000 |
| O  | 3.951993000  | -1.723277000 | -0.132633000 |
| O  | 3.240722000  | -0.126574000 | -1.835443000 |
| Cl | -4.759349000 | 1.482679000  | -0.634754000 |
| O  | -5.355445000 | 2.586318000  | -1.420340000 |
| O  | -3.634468000 | 1.994967000  | 0.223927000  |
| O  | -4.199620000 | 0.430743000  | -1.562417000 |
| O  | -5.794033000 | 0.848437000  | 0.252078000  |
| H  | 0.529970000  | -3.409319000 | 1.813512000  |

Zero-point correction= 0.143166 (Hartree/Particle)

Thermal correction to Energy= 0.150630

Thermal correction to Enthalpy= 0.151574

Thermal correction to Gibbs Free Energy= 0.110407

Sum of electronic and zero-point Energies= -310.090182

Sum of electronic and thermal Energies= -310.082719

Sum of electronic and thermal Enthalpies= -310.081774

Sum of electronic and thermal Free Energies= -310.1229

|   |              |              |              |
|---|--------------|--------------|--------------|
| C | 0.461515000  | 0.295909000  | 0.000006000  |
| C | 0.015516000  | -1.057677000 | -0.000004000 |
| C | -1.337755000 | -1.365909000 | 0.000002000  |
| C | -2.302059000 | -0.349666000 | 0.000004000  |
| C | -1.889683000 | 0.990733000  | -0.000005000 |
| C | -0.541076000 | 1.309527000  | -0.000005000 |
| H | 0.747957000  | -1.859584000 | -0.000016000 |
| H | -1.650435000 | -2.407247000 | 0.000002000  |
| H | -3.359689000 | -0.597738000 | 0.000017000  |
| H | -2.631208000 | 1.785737000  | -0.000017000 |
| H | -0.228482000 | 2.351359000  | -0.000017000 |
| C | 1.833015000  | 0.646866000  | 0.000012000  |
| H | 2.076269000  | 1.706841000  | 0.000030000  |
| C | 2.965458000  | -0.332506000 | -0.000005000 |
| H | 3.931004000  | 0.181288000  | 0.000220000  |
| H | 2.942376000  | -0.992318000 | 0.880584000  |
| H | 2.942615000  | -0.991998000 | -0.880841000 |

## 2+EB

### <sup>3</sup>TS

Zero-point correction= 0.681700 (Hartree/Particle)

Thermal correction to Energy= 0.721437

Thermal correction to Enthalpy= 0.722381

Thermal correction to Gibbs Free Energy= 0.607393

Sum of electronic and zero-point Energies= -2649.329054

Sum of electronic and thermal Energies= -2649.289316

Sum of electronic and thermal Enthalpies= -2649.288372

Sum of electronic and thermal Free Energies= -2649.4033

|    |              |              |             |
|----|--------------|--------------|-------------|
| Ru | -0.563277000 | -0.491868000 | 0.127104000 |
| C  | 1.701573000  | 1.042379000  | 1.747399000 |
| H  | 1.944818000  | 1.927763000  | 2.350997000 |

|   |              |              |              |
|---|--------------|--------------|--------------|
| H | 2.482396000  | 0.911843000  | 1.001997000  |
| H | 1.690378000  | 0.155370000  | 2.377653000  |
| N | -1.512506000 | -0.789002000 | 2.112846000  |
| N | 0.373234000  | 1.243608000  | 1.094511000  |
| C | -1.136534000 | -2.031089000 | 2.842224000  |
| H | -1.392169000 | -2.911375000 | 2.255859000  |
| H | -1.662752000 | -2.071681000 | 3.807292000  |
| C | -1.059313000 | 0.375688000  | 2.951862000  |
| H | -0.205612000 | 0.037492000  | 3.542165000  |
| H | -1.850145000 | 0.656679000  | 3.661344000  |
| C | -2.993107000 | -0.775295000 | 1.916649000  |
| H | -3.468982000 | -0.901925000 | 2.902662000  |
| H | -3.267853000 | 0.207975000  | 1.538813000  |
| C | -3.547118000 | -1.856948000 | 0.972353000  |
| H | -4.637332000 | -1.812558000 | 1.088957000  |
| H | -3.260681000 | -2.857226000 | 1.313868000  |
| C | -3.297193000 | -1.687945000 | -0.533280000 |
| H | -3.937471000 | -2.400713000 | -1.075279000 |
| H | -3.589368000 | -0.681569000 | -0.824076000 |
| C | -1.560892000 | -3.329336000 | -0.980567000 |
| H | -2.274764000 | -3.881217000 | -1.609938000 |
| H | -1.607382000 | -3.711637000 | 0.038509000  |
| H | -0.549653000 | -3.497424000 | -1.344301000 |
| N | 0.485038000  | -0.306560000 | -1.778072000 |
| N | -1.886969000 | -1.883259000 | -0.998655000 |
| S | 1.090562000  | -2.101207000 | 0.603506000  |
| C | 1.897284000  | -0.839969000 | -1.718309000 |
| H | 2.531092000  | -0.113946000 | -1.213678000 |
| H | 2.272420000  | -0.929635000 | -2.749330000 |
| C | 2.014988000  | -2.164115000 | -0.984318000 |
| H | 3.074704000  | -2.318457000 | -0.756613000 |
| H | 1.660049000  | -3.018924000 | -1.574194000 |
| C | -1.749304000 | -1.336956000 | -2.388447000 |
| C | -0.287460000 | -1.130998000 | -2.772166000 |
| H | 0.216123000  | -2.095054000 | -2.863040000 |
| H | -0.238819000 | -0.656699000 | -3.761205000 |
| C | 0.524201000  | 1.133294000  | -2.192606000 |
| H | 1.065009000  | 1.189742000  | -3.149428000 |
| H | -0.510956000 | 1.442088000  | -2.350544000 |
| C | 1.207433000  | 2.087282000  | -1.197507000 |
| C | 0.471175000  | 2.380947000  | 0.115213000  |
| H | -0.060932000 | -2.047689000 | 3.014830000  |
| C | -0.657228000 | 1.588015000  | 2.121627000  |
| H | -1.523639000 | 1.985961000  | 1.595533000  |
| H | -0.272542000 | 2.370103000  | 2.793223000  |
| H | -0.548885000 | 2.685505000  | -0.112065000 |
| H | 0.984450000  | 3.209069000  | 0.625018000  |
| H | 1.260533000  | 3.054437000  | -1.716984000 |
| H | 2.247663000  | 1.807785000  | -1.012120000 |
| H | -2.266754000 | -0.379163000 | -2.395260000 |
| H | -2.228322000 | -2.015086000 | -3.111147000 |
| O | -1.845433000 | 0.830786000  | -0.586648000 |
| O | 4.198692000  | 1.110083000  | -0.467239000 |
| O | 4.923409000  | 0.077317000  | 1.683839000  |
| C | 6.767965000  | 0.729167000  | -0.097050000 |
| F | 7.686907000  | -0.081929000 | 0.450128000  |
| F | 6.921259000  | 1.954130000  | 0.434592000  |
| F | 7.016008000  | 0.814092000  | -1.415474000 |
| S | 5.051983000  | 0.087434000  | 0.213167000  |
| O | 5.044604000  | -1.235497000 | -0.454653000 |
| C | -5.087529000 | 1.668078000  | -0.135016000 |
| C | -5.808518000 | 1.289671000  | 1.019692000  |
| C | -7.001839000 | 0.576162000  | 0.932207000  |
| C | -7.515977000 | 0.215149000  | -0.317117000 |
| C | -6.823408000 | 0.585610000  | -1.473770000 |
| C | -5.630247000 | 1.300205000  | -1.386349000 |
| H | -5.430277000 | 1.584869000  | 1.996392000  |

|   |              |              |              |
|---|--------------|--------------|--------------|
| H | -7.540258000 | 0.312993000  | 1.839244000  |
| H | -8.448821000 | -0.336970000 | -0.388591000 |
| H | -7.219484000 | 0.320956000  | -2.450951000 |
| H | -5.112708000 | 1.583243000  | -2.298248000 |
| C | -3.807402000 | 2.386550000  | -0.014829000 |
| H | -3.650740000 | 2.777234000  | 0.996356000  |
| H | -2.769366000 | 1.465384000  | -0.178494000 |
| C | -3.426729000 | 3.388521000  | -1.092209000 |
| H | -2.481869000 | 3.882576000  | -0.844701000 |
| H | -3.293122000 | 2.907614000  | -2.067415000 |
| H | -4.192738000 | 4.168760000  | -1.206592000 |

### <sup>3</sup>IH(P+S)

Zero-point correction= 0.536478 (Hartree/Particle)  
 Thermal correction to Energy= 0.569498  
 Thermal correction to Enthalpy= 0.570442  
 Thermal correction to Gibbs Free Energy= 0.472085  
 Sum of electronic and zero-point Energies= -2339.207053  
 Sum of electronic and thermal Energies= -2339.174034  
 Sum of electronic and thermal Enthalpies= -2339.173090  
 Sum of electronic and thermal Free Energies= -2339.2714

|    |              |              |              |
|----|--------------|--------------|--------------|
| Ru | 1.532599000  | 0.055387000  | 0.061773000  |
| C  | -0.900779000 | 2.318436000  | 0.405743000  |
| H  | -1.283214000 | 3.243523000  | 0.866154000  |
| H  | -1.665190000 | 1.546540000  | 0.483073000  |
| H  | -0.727064000 | 2.490050000  | -0.657294000 |
| N  | 2.651803000  | 1.764319000  | -0.940068000 |
| N  | 0.347903000  | 1.891791000  | 1.078654000  |
| C  | 2.519745000  | 1.795165000  | -2.421738000 |
| H  | 2.908424000  | 0.875344000  | -2.856714000 |
| H  | 3.068827000  | 2.653770000  | -2.836355000 |
| C  | 2.031034000  | 3.028919000  | -0.399718000 |
| H  | 1.259091000  | 3.324853000  | -1.112021000 |
| H  | 2.786058000  | 3.828353000  | -0.394856000 |
| C  | 4.101837000  | 1.669059000  | -0.579418000 |
| H  | 4.623359000  | 2.499171000  | -1.083013000 |
| H  | 4.194117000  | 1.844944000  | 0.494586000  |
| C  | 4.832812000  | 0.357338000  | -0.946995000 |
| H  | 5.901011000  | 0.601725000  | -0.873117000 |
| H  | 4.673846000  | 0.117305000  | -2.003570000 |
| C  | 4.629540000  | -0.893682000 | -0.063619000 |
| H  | 5.480467000  | -1.573879000 | -0.242686000 |
| H  | 4.653713000  | -0.589660000 | 0.982961000  |
| C  | 3.386925000  | -2.406329000 | -1.516031000 |
| H  | 4.154388000  | -3.198400000 | -1.476896000 |
| H  | 3.599485000  | -1.755554000 | -2.366828000 |
| H  | 2.413614000  | -2.863263000 | -1.700270000 |
| N  | 0.545996000  | -1.645036000 | 0.989658000  |
| N  | 3.359678000  | -1.626161000 | -0.272638000 |
| S  | 0.255700000  | -0.467190000 | -1.809277000 |
| C  | -0.734874000 | -2.004519000 | 0.276755000  |
| H  | -1.500352000 | -1.276451000 | 0.544601000  |
| H  | -1.072285000 | -2.987549000 | 0.639660000  |
| C  | -0.594971000 | -2.003358000 | -1.235685000 |
| H  | -1.602865000 | -1.994154000 | -1.662992000 |
| H  | -0.048298000 | -2.870864000 | -1.624350000 |
| C  | 2.989508000  | -2.461231000 | 0.897063000  |
| C  | 1.492376000  | -2.812686000 | 0.945217000  |
| H  | 1.223507000  | -3.405880000 | 0.068988000  |
| H  | 1.314057000  | -3.448745000 | 1.823280000  |
| C  | 0.245749000  | -1.231862000 | 2.411878000  |
| H  | -0.311899000 | -2.064913000 | 2.865192000  |
| H  | 1.206410000  | -1.132311000 | 2.918399000  |
| C  | -0.592102000 | 0.055522000  | 2.616401000  |
| C  | 0.080307000  | 1.440097000  | 2.476116000  |
| H  | 1.466863000  | 1.871484000  | -2.693241000 |

|   |              |              |              |
|---|--------------|--------------|--------------|
| C | 1.392035000  | 2.933203000  | 0.997301000  |
| H | 2.150536000  | 2.724336000  | 1.754159000  |
| H | 0.977782000  | 3.928888000  | 1.229641000  |
| H | 1.033810000  | 1.426060000  | 3.004128000  |
| H | -0.577251000 | 2.178964000  | 2.961270000  |
| H | -0.903343000 | 0.003435000  | 3.669177000  |
| H | -1.525575000 | 0.021181000  | 2.048250000  |
| H | 3.254894000  | -1.895961000 | 1.789297000  |
| H | 3.553809000  | -3.409819000 | 0.896160000  |
| O | 2.646552000  | 0.225766000  | 1.803278000  |
| O | -3.278262000 | -0.028487000 | 0.837944000  |
| O | -3.706444000 | 1.341189000  | -1.203084000 |
| C | -5.706107000 | -0.037441000 | -0.157190000 |
| F | -6.425201000 | 0.007745000  | -1.289683000 |
| F | -6.079936000 | 0.995562000  | 0.617425000  |
| F | -6.013999000 | -1.174975000 | 0.489530000  |
| S | -3.886748000 | 0.041910000  | -0.526786000 |
| O | -3.644873000 | -1.166298000 | -1.350035000 |
| H | 3.142241000  | 1.048387000  | 1.918243000  |

Zero-point correction= 0.143166 (Hartree/Particle)

Thermal correction to Energy= 0.150630  
 Thermal correction to Enthalpy= 0.151574  
 Thermal correction to Gibbs Free Energy= 0.110406  
 Sum of electronic and zero-point Energies= -310.090182  
 Sum of electronic and thermal Energies= -310.082718  
 Sum of electronic and thermal Enthalpies= -310.081774  
 Sum of electronic and thermal Free Energies= -310.12294

|   |              |              |              |
|---|--------------|--------------|--------------|
| C | 0.461522000  | -0.295893000 | -0.000008000 |
| C | -0.541055000 | -1.309519000 | -0.000006000 |
| C | -1.889670000 | -0.990747000 | 0.000007000  |
| C | -2.302067000 | 0.349641000  | 0.000009000  |
| C | -1.337776000 | 1.365902000  | -0.000001000 |
| C | 0.015495000  | 1.057694000  | -0.000012000 |
| H | -0.228451000 | -2.351348000 | -0.000009000 |
| H | -2.631175000 | -1.785769000 | 0.000012000  |
| H | -3.359699000 | 0.597703000  | 0.000019000  |
| H | -1.650480000 | 2.407233000  | -0.000003000 |
| H | 0.747917000  | 1.859616000  | -0.000023000 |
| C | 1.833016000  | -0.646841000 | -0.000021000 |
| H | 2.076261000  | -1.706817000 | 0.000026000  |
| C | 2.965464000  | 0.332499000  | 0.000013000  |
| H | 3.931004000  | -0.181315000 | -0.000302000 |
| H | 2.942362000  | 0.992381000  | -0.880519000 |
| H | 2.942684000  | 0.991904000  | 0.880915000  |

### 2'+EB

#### <sup>3</sup>TS

Zero-point correction= 0.682950 (Hartree/Particle)  
 Thermal correction to Energy= 0.722439  
 Thermal correction to Enthalpy= 0.723383  
 Thermal correction to Gibbs Free Energy= 0.609381  
 Sum of electronic and zero-point Energies=-2678.863820  
 Sum of electronic and thermal Energies=-2678.824331  
 Sum of electronic and thermal Enthalpies=-2678.823386  
 Sum of electronic and thermal Free Energies=-2678.9373

|    |              |              |             |
|----|--------------|--------------|-------------|
| Fe | 0.639497000  | 0.563293000  | 0.066327000 |
| C  | -1.584517000 | -0.924521000 | 1.701832000 |
| H  | -1.791530000 | -1.804471000 | 2.326533000 |
| H  | -2.388865000 | -0.834151000 | 0.976929000 |
| H  | -1.581103000 | -0.024492000 | 2.310787000 |
| N  | 1.629732000  | 0.898145000  | 1.957765000 |
| N  | -0.268124000 | -1.113381000 | 1.018398000 |
| C  | 1.350567000  | 2.158228000  | 2.703475000 |



|   |              |              |              |
|---|--------------|--------------|--------------|
| H | 1.605776000  | 3.028698000  | 2.104283000  |
| H | 1.940436000  | 2.171656000  | 3.631816000  |
| C | 1.166415000  | -0.227540000 | 2.833066000  |
| H | 0.306381000  | 0.131474000  | 3.400620000  |
| H | 1.950102000  | -0.485312000 | 3.559649000  |
| C | 3.103078000  | 0.811209000  | 1.734665000  |
| H | 3.600061000  | 0.900878000  | 2.713834000  |
| H | 3.325997000  | -0.177712000 | 1.341455000  |
| C | 3.685367000  | 1.876171000  | 0.797229000  |
| H | 4.775210000  | 1.759278000  | 0.850351000  |
| H | 3.482326000  | 2.884095000  | 1.173688000  |
| C | 3.325039000  | 1.748194000  | -0.684504000 |
| H | 3.926151000  | 2.470212000  | -1.258755000 |
| H | 3.587965000  | 0.747774000  | -1.018584000 |
| C | 1.575644000  | 3.407001000  | -0.944071000 |
| H | 2.252992000  | 3.972552000  | -1.601651000 |
| H | 1.693938000  | 3.757524000  | 0.079599000  |
| H | 0.544447000  | 3.597341000  | -1.230524000 |
| N | -0.494793000 | 0.419599000  | -1.702118000 |
| N | 1.886891000  | 1.959701000  | -1.032153000 |
| S | -0.911396000 | 2.129476000  | 0.689939000  |
| C | -1.910750000 | 0.917181000  | -1.547731000 |
| H | -2.498174000 | 0.171906000  | -1.019275000 |
| H | -2.352571000 | 1.011125000  | -2.551624000 |
| C | -1.988480000 | 2.225868000  | -0.786791000 |
| H | -3.025669000 | 2.355488000  | -0.462192000 |
| H | -1.710749000 | 3.095511000  | -1.396472000 |
| C | 1.666981000  | 1.481268000  | -2.430110000 |
| C | 0.186489000  | 1.293310000  | -2.712627000 |
| H | -0.319542000 | 2.259424000  | -2.714646000 |
| H | 0.055600000  | 0.867802000  | -3.716297000 |
| C | -0.534914000 | -0.994811000 | -2.193445000 |
| H | -1.121301000 | -1.004168000 | -3.124457000 |
| H | 0.492665000  | -1.280785000 | -2.421703000 |
| C | -1.160280000 | -2.003125000 | -1.222361000 |
| C | -0.386263000 | -2.270818000 | 0.068875000  |
| H | 0.291715000  | 2.221643000  | 2.947551000  |
| C | 0.770114000  | -1.452625000 | 2.031528000  |
| H | 1.633178000  | -1.857861000 | 1.506721000  |
| H | 0.390845000  | -2.227277000 | 2.714231000  |
| H | 0.626000000  | -2.583736000 | -0.177970000 |
| H | -0.882537000 | -3.089083000 | 0.610683000  |
| H | -1.179008000 | -2.961756000 | -1.759548000 |
| H | -2.208143000 | -1.771566000 | -1.014554000 |
| H | 2.184372000  | 0.528873000  | -2.524220000 |
| H | 2.096222000  | 2.196603000  | -3.148373000 |
| O | 1.792163000  | -0.631468000 | -0.656259000 |
| O | -4.167362000 | -1.153244000 | -0.396647000 |
| O | -4.903399000 | -0.198139000 | 1.786259000  |
| C | -6.738394000 | -0.790202000 | -0.025822000 |
| F | -7.662227000 | -0.000016000 | 0.543749000  |
| F | -6.893248000 | -2.033197000 | 0.461745000  |
| F | -6.979509000 | -0.829699000 | -1.347970000 |
| S | -5.025152000 | -0.156954000 | 0.315576000  |
| O | -5.016819000 | 1.189166000  | -0.304667000 |
| C | 4.982747000  | -1.757197000 | -0.177918000 |
| C | 5.588265000  | -1.700045000 | 1.096474000  |
| C | 6.833061000  | -1.103777000 | 1.283828000  |
| C | 7.514014000  | -0.543270000 | 0.198759000  |
| C | 6.936437000  | -0.595105000 | -1.073476000 |
| C | 5.691421000  | -1.192762000 | -1.260523000 |
| H | 5.074819000  | -2.149255000 | 1.944167000  |
| H | 7.279107000  | -1.086146000 | 2.274828000  |
| H | 8.487111000  | -0.081771000 | 0.340847000  |
| H | 7.462912000  | -0.173435000 | -1.925802000 |
| H | 5.265441000  | -1.229865000 | -2.258842000 |
| C | 3.647515000  | -2.364720000 | -0.339634000 |

|   |             |              |              |
|---|-------------|--------------|--------------|
| H | 3.364006000 | -2.958434000 | 0.535892000  |
| H | 2.698860000 | -1.380916000 | -0.349597000 |
| C | 3.319271000 | -3.070218000 | -1.645173000 |
| H | 2.311713000 | -3.495483000 | -1.612584000 |
| H | 3.355480000 | -2.387426000 | -2.500852000 |
| H | 4.024495000 | -3.889669000 | -1.842383000 |

### <sup>3</sup>IH(P+S)

Zero-point correction= 0.539032 (Hartree/Particle)

Thermal correction to Energy= 0.571203

Thermal correction to Enthalpy= 0.572147

Thermal correction to Gibbs Free Energy= 0.476278

Sum of electronic and zero-point Energies=-  
2368.808947

Sum of electronic and thermal Energies=-2368.776776

Sum of electronic and thermal Enthalpies=-  
2368.775832

Sum of electronic and thermal Free Energies=-  
2368.8717

|    |              |              |              |
|----|--------------|--------------|--------------|
| Fe | 1.707693000  | 0.033506000  | 0.138467000  |
| C  | -0.732043000 | 2.135926000  | 0.368512000  |
| H  | -1.107174000 | 3.068209000  | 0.817144000  |
| H  | -1.511347000 | 1.380877000  | 0.449435000  |
| H  | -0.538195000 | 2.290488000  | -0.692036000 |
| N  | 2.841311000  | 1.716393000  | -0.831993000 |
| N  | 0.503124000  | 1.699561000  | 1.073106000  |
| C  | 2.784371000  | 1.787917000  | -2.316235000 |
| H  | 3.184398000  | 0.878234000  | -2.760426000 |
| H  | 3.362024000  | 2.652950000  | -2.675802000 |
| C  | 2.181140000  | 2.954186000  | -0.297479000 |
| H  | 1.424250000  | 3.251019000  | -1.025337000 |
| H  | 2.914167000  | 3.772546000  | -0.245413000 |
| C  | 4.273425000  | 1.645594000  | -0.417818000 |
| H  | 4.801089000  | 2.499728000  | -0.873079000 |
| H  | 4.328667000  | 1.790533000  | 0.664190000  |
| C  | 5.024833000  | 0.357702000  | -0.802787000 |
| H  | 6.084636000  | 0.564189000  | -0.602266000 |
| H  | 4.969195000  | 0.193431000  | -1.883630000 |
| C  | 4.693487000  | -0.930050000 | -0.031124000 |
| H  | 5.481451000  | -1.671458000 | -2.645283000 |
| H  | 4.716231000  | -0.714178000 | 1.036725000  |
| C  | 3.377857000  | -2.192385000 | -1.640147000 |
| H  | 4.142257000  | -2.985702000 | -1.676133000 |
| H  | 3.586052000  | -1.463235000 | -2.424068000 |
| H  | 2.401710000  | -2.622993000 | -1.858889000 |
| N  | 0.608290000  | -1.614820000 | 0.910556000  |
| N  | 3.366951000  | -1.535594000 | -0.320385000 |
| S  | 0.527980000  | -0.283638000 | -1.763153000 |
| C  | -0.666130000 | -1.862123000 | 0.146581000  |
| H  | -1.405498000 | -1.117799000 | 0.435701000  |
| H  | -1.067983000 | -2.844736000 | 0.438587000  |
| C  | -0.463498000 | -1.775934000 | -1.354321000 |
| H  | -1.450518000 | -1.661232000 | -1.815155000 |
| H  | 0.023075000  | -2.662624000 | -1.777958000 |
| C  | 2.999229000  | -2.501611000 | 0.750546000  |
| C  | 1.498398000  | -2.811150000 | 0.774660000  |
| H  | 1.214039000  | -3.328231000 | -0.143310000 |
| H  | 1.299543000  | -3.506879000 | 1.601453000  |
| C  | 0.292039000  | -1.337236000 | 2.351797000  |
| H  | -0.281213000 | -2.198289000 | 2.728621000  |
| H  | 1.243550000  | -1.291246000 | 2.883220000  |
| C  | -0.527191000 | -0.062024000 | 2.632383000  |
| C  | 0.175699000  | 1.295572000  | 2.477753000  |
| H  | 1.749617000  | 1.886088000  | -2.641870000 |
| C  | 1.507394000  | 2.789393000  | 1.068129000  |
| H  | 2.248692000  | 2.583783000  | 1.842829000  |

|   |              |              |              |
|---|--------------|--------------|--------------|
| H | 1.036319000  | 3.750907000  | 1.327202000  |
| H | 1.111874000  | 1.274325000  | 3.034899000  |
| H | -0.473372000 | 2.070551000  | 2.913983000  |
| H | -0.794251000 | -0.127509000 | 3.696457000  |
| H | -1.482373000 | -0.070280000 | 2.100618000  |
| H | 3.292141000  | -2.055096000 | 1.698809000  |
| H | 3.546327000  | -3.449489000 | 0.619398000  |
| O | 2.672277000  | 0.092402000  | 1.770438000  |
| O | -3.247504000 | -0.005026000 | 0.851165000  |
| O | -3.701249000 | 1.458900000  | -1.117494000 |
| C | -5.666369000 | -0.034502000 | -0.163946000 |
| F | -6.378754000 | 0.048976000  | -1.298633000 |
| F | -6.077894000 | 0.943040000  | 0.661479000  |
| F | -5.942882000 | -1.214282000 | 0.418228000  |
| S | -3.847863000 | 0.120627000  | -0.512746000 |
| O | -3.561615000 | -1.033151000 | -1.398739000 |
| H | 3.215673000  | 0.881087000  | 1.894983000  |

Zero-point correction= 0.143165 (Hartree/Particle)

Thermal correction to Energy= 0.150630

Thermal correction to Enthalpy= 0.151574

Thermal correction to Gibbs Free Energy= 0.110398

Sum of electronic and zero-point Energies= -310.090184

Sum of electronic and thermal Energies= -310.082719

Sum of electronic and thermal Enthalpies= -310.081775

Sum of electronic and thermal Free Energies= -310.12295

|   |              |              |              |
|---|--------------|--------------|--------------|
| C | 0.461527000  | -0.295839000 | 0.000005000  |
| C | -0.541035000 | -1.309506000 | 0.000005000  |
| C | -1.889655000 | -0.990785000 | 0.000002000  |
| C | -2.302107000 | 0.349593000  | 0.000000000  |
| C | -1.337852000 | 1.365883000  | -0.000004000 |
| C | 0.015436000  | 1.057730000  | -0.000003000 |
| H | -0.228382000 | -2.351319000 | 0.000008000  |
| H | -2.631138000 | -1.785828000 | 0.000002000  |
| H | -3.359749000 | 0.597610000  | 0.000003000  |
| H | -1.650589000 | 2.407204000  | -0.000012000 |
| H | 0.747817000  | 1.859686000  | -0.000027000 |
| C | 1.833023000  | -0.646781000 | 0.000011000  |
| H | 2.076271000  | -1.706758000 | -0.000139000 |
| C | 2.965555000  | 0.332477000  | 0.000013000  |
| H | 3.931040000  | -0.181445000 | 0.000889000  |
| H | 2.943209000  | 0.991516000  | -0.881173000 |
| H | 2.942176000  | 0.992693000  | 0.880274000  |

### <sup>5</sup>TS

Zero-point correction= 0.679262 (Hartree/Particle)

Thermal correction to Energy= 0.719892

Thermal correction to Enthalpy= 0.720836

Thermal correction to Gibbs Free Energy= 0.603719

Sum of electronic and zero-point Energies=-2678.874864

Sum of electronic and thermal Energies=-2678.834234

Sum of electronic and thermal Enthalpies=-2678.833290

Sum of electronic and thermal Free Energies=-2678.9504

|    |              |              |             |
|----|--------------|--------------|-------------|
| Fe | 0.603207000  | 0.812139000  | 0.040734000 |
| C  | -1.128130000 | 0.081553000  | 2.649434000 |
| H  | -1.190401000 | -0.521145000 | 3.568559000 |
| H  | -2.085648000 | 0.019719000  | 2.130603000 |
| H  | -0.955172000 | 1.126621000  | 2.905338000 |
| N  | 2.075591000  | 1.735523000  | 1.510651000 |
| N  | -0.024496000 | -0.427957000 | 1.794228000 |
| C  | 1.939895000  | 3.175019000  | 1.839513000 |
| H  | 2.028559000  | 3.783619000  | 0.941029000 |
| H  | 2.716749000  | 3.477313000  | 2.558784000 |
| C  | 1.843701000  | 0.948590000  | 2.764387000 |

|   |              |              |              |
|---|--------------|--------------|--------------|
| H | 1.160345000  | 1.531566000  | 3.385053000  |
| H | 2.785785000  | 0.856358000  | 3.325031000  |
| C | 3.432110000  | 1.476361000  | 0.941971000  |
| H | 4.177314000  | 1.854607000  | 1.661262000  |
| H | 3.558766000  | 0.396981000  | 0.862694000  |
| C | 3.722845000  | 2.125841000  | -0.426404000 |
| H | 4.806339000  | 2.022550000  | -0.570080000 |
| H | 3.542704000  | 3.205395000  | -0.390873000 |
| C | 3.086605000  | 1.503662000  | -1.682454000 |
| H | 3.581831000  | 1.934882000  | -2.568288000 |
| H | 3.285292000  | 0.433751000  | -1.672426000 |
| C | 1.306466000  | 3.071361000  | -2.212186000 |
| H | 1.789879000  | 3.319754000  | -3.170754000 |
| H | 1.656879000  | 3.761820000  | -1.445115000 |
| H | 0.231114000  | 3.214440000  | -2.299708000 |
| N | -0.945221000 | 0.145301000  | -1.340143000 |
| N | 1.614924000  | 1.680374000  | -1.825843000 |
| S | -0.819887000 | 2.683069000  | 0.369895000  |
| C | -2.271168000 | 0.783926000  | -1.049122000 |
| H | -2.681901000 | 0.326129000  | -0.154079000 |
| H | -2.970525000 | 0.562127000  | -1.866084000 |
| C | -2.176545000 | 2.280231000  | -0.805040000 |
| H | -3.131653000 | 2.592550000  | -0.374955000 |
| H | -2.026398000 | 2.857237000  | -1.726390000 |
| C | 1.056630000  | 0.722503000  | -2.821635000 |
| C | -0.464941000 | 0.550794000  | -2.697030000 |
| H | -0.961927000 | 1.487560000  | -2.954429000 |
| H | -0.791608000 | -0.190193000 | -3.439912000 |
| C | -1.059237000 | -1.344836000 | -1.218932000 |
| H | -1.854161000 | -1.673625000 | -1.903983000 |
| H | -0.110453000 | -1.764416000 | -1.560425000 |
| C | -1.407743000 | -1.888672000 | 0.180603000  |
| C | -0.351698000 | -1.801472000 | 1.294009000  |
| H | 0.956054000  | 3.365043000  | 2.268110000  |
| C | 1.258340000  | -0.450703000 | 2.547361000  |
| H | 1.962585000  | -1.062260000 | 1.985003000  |
| H | 1.109740000  | -0.913443000 | 3.535942000  |
| H | 0.581760000  | -2.241523000 | 0.944324000  |
| H | -0.711592000 | -2.396158000 | 2.147823000  |
| H | -1.575387000 | -2.964407000 | 0.030217000  |
| H | -2.371368000 | -1.504338000 | 0.525287000  |
| H | 1.547081000  | -0.235112000 | -2.655668000 |
| H | 1.285048000  | 1.057747000  | -3.846388000 |
| O | 1.671396000  | -0.567590000 | -0.320385000 |
| O | -4.078057000 | -0.520701000 | 1.424386000  |
| O | -6.547687000 | -0.135531000 | 1.585459000  |
| C | -5.589395000 | -1.460164000 | -0.482335000 |
| F | -6.656148000 | -1.241013000 | -1.262880000 |
| F | -5.749141000 | -2.646630000 | 0.124675000  |
| F | -4.505562000 | -1.573725000 | -1.301603000 |
| S | -5.341235000 | -0.085611000 | 0.750286000  |
| O | -5.173565000 | 1.104464000  | -0.116706000 |
| C | 4.524869000  | -2.214119000 | -0.205385000 |
| C | 4.851627000  | -2.365412000 | 1.160704000  |
| C | 6.088669000  | -1.966433000 | 1.658943000  |
| C | 7.040751000  | -1.400400000 | 0.804776000  |
| C | 6.740061000  | -1.245542000 | -0.551654000 |
| C | 5.501248000  | -1.644519000 | -1.050578000 |
| H | 4.122509000  | -2.819139000 | 1.828761000  |
| H | 6.316834000  | -2.105975000 | 2.712333000  |
| H | 8.008730000  | -1.092747000 | 1.190008000  |
| H | 7.478467000  | -0.819337000 | -1.225845000 |
| H | 5.293749000  | -1.525356000 | -2.109881000 |
| C | 3.184581000  | -2.597680000 | -0.682755000 |
| H | 2.690565000  | -3.296254000 | 0.000833000  |
| H | 2.408029000  | -1.519549000 | -0.491136000 |
| C | 2.977882000  | -2.973806000 | -2.138655000 |

|   |             |              |              |
|---|-------------|--------------|--------------|
| H | 1.922909000 | -3.193826000 | -2.332883000 |
| H | 3.281116000 | -2.176202000 | -2.826398000 |
| H | 3.556843000 | -3.869721000 | -2.404538000 |

**<sup>5</sup>IH(P+S)**

Zero-point correction= 0.538033 (Hartree/Particle)  
 Thermal correction to Energy= 0.570474  
 Thermal correction to Enthalpy= 0.571418  
 Thermal correction to Gibbs Free Energy= 0.475456  
 Sum of electronic and zero-point Energies= -2368.810330  
 Sum of electronic and thermal Energies= -2368.777890  
 Sum of electronic and thermal Enthalpies= -2368.776946  
 Sum of electronic and thermal Free Energies= -2368.8729

|    |              |               |              |
|----|--------------|---------------|--------------|
| Fe | -1.680604000 | 0.031184000   | -0.100760000 |
| C  | 0.190705000  | 2.620109000   | 0.221918000  |
| H  | 0.432201000  | 3.638143000   | -0.120319000 |
| H  | 1.122246000  | 2.065038000   | 0.344143000  |
| H  | -0.300307000 | 2.666997000   | 1.193503000  |
| N  | -3.348818000 | 1.422236000   | 0.599408000  |
| N  | -0.696523000 | 1.954934000   | -0.770717000 |
| C  | -3.647297000 | 1.477333000   | 2.049990000  |
| H  | -3.917509000 | 0.489789000   | 2.421602000  |
| H  | -4.474658000 | 2.175873000   | 2.248755000  |
| C  | -2.884507000 | 2.777798000   | 0.162010000  |
| H  | -2.401661000 | 3.244982000   | 1.022747000  |
| H  | -3.751733000 | 3.404535000   | -0.094426000 |
| C  | -4.566176000 | 0.994857000   | -0.156943000 |
| H  | -5.383587000 | 1.687282000   | 0.103926000  |
| H  | -4.340382000 | 1.100720000   | -1.218359000 |
| C  | -5.054181000 | -0.445449000  | 0.105252000  |
| H  | -6.071378000 | -0.4877054000 | -0.306389000 |
| H  | -5.178140000 | -0.627089000  | 1.178280000  |
| C  | -4.293501000 | -1.602232000  | -0.569157000 |
| H  | -4.908766000 | -2.513353000  | -0.489022000 |
| H  | -4.164025000 | -1.361959000  | -1.622867000 |
| C  | -3.058611000 | -2.580111000  | 1.281927000  |
| H  | -3.605046000 | -3.529848000  | 1.166446000  |
| H  | -3.589283000 | -1.949146000  | 1.995623000  |
| H  | -2.074258000 | -2.780253000  | 1.702089000  |
| N  | -0.020043000 | -1.313673000  | -0.610557000 |
| N  | -2.938401000 | -1.890486000  | -0.017472000 |
| S  | -0.847100000 | -0.125500000  | 2.105651000  |
| C  | 1.060564000  | -1.271821000  | 0.423302000  |
| H  | 1.614956000  | -0.345551000  | 0.303698000  |
| H  | 1.771838000  | -2.090767000  | 0.251239000  |
| C  | 0.535948000  | -1.311278000  | 1.851074000  |
| H  | 1.368268000  | -1.033870000  | 2.503144000  |
| H  | 0.191031000  | -2.306469000  | 2.158365000  |
| C  | -2.136497000 | -2.706216000  | -0.975966000 |
| C  | -0.630960000 | -2.679060000  | -0.670699000 |
| H  | -0.439572000 | -3.163201000  | 0.288646000  |
| H  | -0.113190000 | -3.281237000  | -1.430681000 |
| C  | 0.521849000  | -0.896238000  | -1.943494000 |
| H  | 1.362622000  | -1.562286000  | -2.186842000 |
| H  | -0.269279000 | -1.072236000  | -2.677359000 |
| C  | 1.051953000  | 0.549418000   | -2.048938000 |
| C  | 0.064515000  | 1.729862000   | -2.039641000 |
| H  | -2.761983000 | 1.802744000   | 2.597048000  |
| C  | -1.911805000 | 2.778083000   | -1.022764000 |
| H  | -2.411738000 | 2.379956000   | -1.905713000 |
| H  | -1.629570000 | 3.822553000   | -1.230445000 |
| H  | -0.659458000 | 1.623699000   | -2.853806000 |
| H  | 0.637271000  | 2.642182000   | -2.264240000 |
| H  | 1.545183000  | 0.599484000   | -3.029603000 |

|   |              |              |              |
|---|--------------|--------------|--------------|
| H | 1.853845000  | 0.726036000  | -1.326993000 |
| H | -2.317905000 | -2.293211000 | -1.966634000 |
| H | -2.473326000 | -3.755545000 | -0.960739000 |
| O | -2.426158000 | -0.031542000 | -1.889342000 |
| O | 3.150868000  | 1.324791000  | 0.276824000  |
| O | 5.369635000  | 1.286755000  | 1.438350000  |
| C | 4.905475000  | -0.439686000 | -0.501397000 |
| F | 5.849545000  | -1.308943000 | -0.118064000 |
| F | 5.433398000  | 0.374688000  | -1.428111000 |
| F | 3.919269000  | -1.155045000 | -1.112577000 |
| S | 4.222077000  | 0.517697000  | 0.942679000  |
| O | 3.696695000  | -0.550401000 | 1.825540000  |
| H | -1.973212000 | 0.380727000  | -2.634010000 |

Zero-point correction= 0.143166 (Hartree/Particle)

Thermal correction to Energy= 0.150630  
 Thermal correction to Enthalpy= 0.151574  
 Thermal correction to Gibbs Free Energy= 0.110406  
 Sum of electronic and zero-point Energies= -310.090182  
 Sum of electronic and thermal Energies= -310.082719  
 Sum of electronic and thermal Enthalpies= -310.081774  
 Sum of electronic and thermal Free Energies= -310.12294

|   |              |              |              |
|---|--------------|--------------|--------------|
| C | 0.461518000  | -0.295901000 | -0.000002000 |
| C | -0.541069000 | -1.309525000 | -0.000004000 |
| C | -1.889676000 | -0.990740000 | 0.000001000  |
| C | -2.302063000 | 0.349655000  | 0.000005000  |
| C | -1.337768000 | 1.365906000  | 0.000000000  |
| C | 0.015505000  | 1.057685000  | -0.000005000 |
| H | -0.228462000 | -2.351353000 | -0.000008000 |
| H | -2.631197000 | -1.785749000 | 0.000000000  |
| H | -3.359696000 | 0.597716000  | 0.000012000  |
| H | -1.650457000 | 2.407240000  | -0.000001000 |
| H | 0.747938000  | 1.859597000  | -0.000012000 |
| C | 1.833016000  | -0.646851000 | 0.000000000  |
| H | 2.076273000  | -1.706824000 | 0.000013000  |
| C | 2.965465000  | 0.332502000  | 0.000003000  |
| H | 3.931005000  | -0.181307000 | -0.000046000 |
| H | 2.942491000  | 0.992182000  | -0.880687000 |
| H | 2.942542000  | 0.992116000  | 0.880744000  |

**2+DHA**

**<sup>3</sup>TS**

Zero-point correction= 0.742161 (Hartree/Particle)  
 Thermal correction to Energy= 0.784790  
 Thermal correction to Enthalpy= 0.785734  
 Thermal correction to Gibbs Free Energy= 0.664650  
 Sum of electronic and zero-point Energies= -2879.127866  
 Sum of electronic and thermal Energies= -2879.085237  
 Sum of electronic and thermal Enthalpies= -2879.084293  
 Sum of electronic and thermal Free Energies= -2879.2053

|    |              |              |              |
|----|--------------|--------------|--------------|
| Ru | 0.115516000  | -1.050616000 | -0.052709000 |
| C  | -2.078710000 | 0.163639000  | -2.002976000 |
| H  | -2.263428000 | 0.817384000  | -2.866561000 |
| H  | -2.796925000 | 0.413757000  | -1.225914000 |
| H  | -2.238403000 | -0.875683000 | -2.283362000 |
| N  | 0.833100000  | -2.140836000 | -1.848067000 |
| N  | -0.680703000 | 0.373393000  | -1.520376000 |
| C  | 0.240360000  | -3.486090000 | -2.082716000 |
| H  | 0.436194000  | -4.143820000 | -1.238320000 |
| H  | 0.667007000  | -3.928277000 | -2.994969000 |
| C  | 0.454889000  | -1.275410000 | -3.020355000 |
| H  | -0.484659000 | -1.663146000 | -3.418478000 |
| H  | 1.206596000  | -1.372702000 | -3.816038000 |
| C  | 2.316602000  | -2.280967000 | -1.729784000 |

|   |              |              |              |
|---|--------------|--------------|--------------|
| H | 2.682345000  | -2.798522000 | -2.631477000 |
| H | 2.741995000  | -1.278541000 | -1.722663000 |
| C | 2.814055000  | -3.053311000 | -0.494781000 |
| H | 3.886052000  | -3.214229000 | -0.664887000 |
| H | 2.374095000  | -4.055292000 | -0.457456000 |
| C | 2.726185000  | -2.352145000 | 0.868300000  |
| H | 3.319115000  | -2.927267000 | 1.595777000  |
| H | 3.167219000  | -1.361833000 | 0.777822000  |
| C | 0.844071000  | -3.469990000 | 1.926420000  |
| H | 1.536263000  | -3.878714000 | 2.677497000  |
| H | 0.749555000  | -4.174863000 | 1.101170000  |
| H | -0.143658000 | -3.352925000 | 2.366712000  |
| N | -0.722141000 | -0.079583000 | 1.712528000  |
| N | 1.350456000  | -2.167829000 | 1.430793000  |
| S | -1.771424000 | -2.464309000 | 0.137062000  |
| C | -2.190744000 | -0.379518000 | 1.900344000  |
| H | -2.768615000 | 0.218021000  | 1.198695000  |
| H | -2.478835000 | -0.052979000 | 2.911370000  |
| C | -2.544340000 | -1.840272000 | 1.684007000  |
| H | -3.631691000 | -1.899421000 | 1.570503000  |
| H | -2.248738000 | -2.486017000 | 2.520804000  |
| C | 1.407195000  | -1.173151000 | 2.551029000  |
| C | 0.024815000  | -0.629542000 | 2.897473000  |
| H | -0.588520000 | -1.418292000 | 3.336421000  |
| H | 0.127493000  | 0.151468000  | 3.662268000  |
| C | -0.536538000 | 1.404778000  | 1.602233000  |
| H | -0.974075000 | 1.861250000  | 2.502863000  |
| H | 0.539480000  | 1.588665000  | 1.597203000  |
| C | -1.182603000 | 2.059464000  | 0.369130000  |
| C | -0.542699000 | 1.777280000  | -0.995396000 |
| H | -0.840098000 | -3.399006000 | -2.192741000 |
| C | 0.283702000  | 0.191864000  | -2.648158000 |
| H | 1.237065000  | 0.613907000  | -2.335028000 |
| H | -0.063734000 | 0.746318000  | -3.532726000 |
| H | 0.522425000  | 1.993599000  | -0.938477000 |
| H | -0.998711000 | 2.448478000  | -1.737419000 |
| H | -1.057767000 | 3.140508000  | 0.521390000  |
| H | -2.263202000 | 1.898070000  | 0.340069000  |
| H | 2.043260000  | -0.359178000 | 2.207980000  |
| H | 1.856870000  | -1.633303000 | 3.444115000  |
| O | 1.603256000  | 0.204470000  | 0.098426000  |
| O | -4.334490000 | 1.346550000  | 0.149746000  |
| O | -5.379574000 | -0.228689000 | -1.476813000 |
| C | -6.954649000 | 1.253307000  | 0.046723000  |
| F | -8.014946000 | 0.452903000  | -0.145506000 |
| F | -7.001167000 | 2.236486000  | -0.868655000 |
| F | -7.067356000 | 1.812780000  | 1.263826000  |
| S | -5.369094000 | 0.295109000  | -0.096575000 |
| O | -5.467177000 | -0.710958000 | 0.987200000  |
| C | 6.622981000  | -1.146296000 | -0.709574000 |
| C | 5.526034000  | -0.484838000 | -1.258754000 |
| C | 4.841630000  | 0.510335000  | -0.536951000 |
| C | 5.293936000  | 0.844310000  | 0.759705000  |
| C | 6.400082000  | 0.181382000  | 1.295842000  |
| C | 7.062307000  | -0.815591000 | 0.575445000  |
| C | 3.667708000  | 1.215626000  | -1.091673000 |
| C | 4.552081000  | 1.909694000  | 1.541758000  |
| C | 3.928181000  | 2.970372000  | 0.657435000  |
| C | 3.487873000  | 2.609492000  | -0.634746000 |
| C | 2.879754000  | 3.585393000  | -1.444013000 |
| H | 2.556220000  | 3.315954000  | -2.447342000 |
| C | 2.707640000  | 4.890139000  | -0.987398000 |
| C | 3.149616000  | 5.243293000  | 0.290583000  |
| C | 3.760864000  | 4.283533000  | 1.100712000  |
| H | 3.552128000  | 1.091004000  | -2.172847000 |
| H | 7.145744000  | -1.903383000 | -1.288326000 |
| H | 5.205098000  | -0.719042000 | -2.271880000 |

|   |             |              |              |
|---|-------------|--------------|--------------|
| H | 6.752345000 | 0.453012000  | 2.288868000  |
| H | 7.923234000 | -1.318220000 | 1.007345000  |
| H | 3.749505000 | 1.426078000  | 2.123710000  |
| H | 2.241010000 | 5.632461000  | -1.629222000 |
| H | 3.026888000 | 6.260686000  | 0.651262000  |
| H | 4.114407000 | 4.560265000  | 2.091842000  |
| H | 2.560566000 | 0.599582000  | -0.557658000 |
| H | 5.217922000 | 2.371311000  | 2.280668000  |

### <sup>3</sup>H

Zero-point correction= 0.745863 (Hartree/Particle)

Thermal correction to Energy= 0.789734

Thermal correction to Enthalpy= 0.790679

Thermal correction to Gibbs Free Energy= 0.663384

Sum of electronic and zero-point Energies= -2879.162856

Sum of electronic and thermal Energies= -2879.118984

Sum of electronic and thermal Enthalpies= -2879.118040

Sum of electronic and thermal Free Energies= -2879.2453

|    |              |              |              |
|----|--------------|--------------|--------------|
| Ru | 0.076897000  | -0.553995000 | 0.496898000  |
| C  | 2.227184000  | 1.754695000  | 0.858505000  |
| H  | 2.422470000  | 2.835773000  | 0.830428000  |
| H  | 3.004204000  | 1.253194000  | 0.286907000  |
| H  | 2.280600000  | 1.395115000  | 1.884426000  |
| N  | -0.881295000 | 0.287896000  | 2.333243000  |
| N  | 0.878573000  | 1.482264000  | 0.276254000  |
| C  | -0.427644000 | -0.310922000 | 3.618445000  |
| H  | -0.638062000 | -1.378592000 | 3.638643000  |
| H  | -0.938576000 | 0.175401000  | 4.463024000  |
| C  | -0.489072000 | 1.740408000  | 2.360035000  |
| H  | 0.385360000  | 1.826200000  | 3.007969000  |
| H  | -1.289199000 | 2.339378000  | 2.817128000  |
| C  | -2.361708000 | 0.123260000  | 2.235428000  |
| H  | -2.814671000 | 0.530938000  | 3.153267000  |
| H  | -2.725127000 | 0.734835000  | 1.408466000  |
| C  | -2.851364000 | -1.326614000 | 2.059797000  |
| H  | -3.942649000 | -1.283419000 | 2.170598000  |
| H  | -2.503838000 | -1.953330000 | 2.887782000  |
| C  | -2.610780000 | -2.007654000 | 0.705126000  |
| H  | -3.218137000 | -2.924450000 | 0.662634000  |
| H  | -2.943942000 | -1.339767000 | -0.086234000 |
| C  | -0.793827000 | -3.548475000 | 1.195571000  |
| H  | -1.481594000 | -4.386514000 | 1.007695000  |
| H  | -0.813884000 | -3.295588000 | 2.255161000  |
| H  | 0.222743000  | -3.851667000 | 0.953736000  |
| N  | 1.073951000  | -1.408538000 | -1.229383000 |
| N  | -1.193203000 | -2.373773000 | 0.384392000  |
| S  | 1.810801000  | -1.498504000 | 1.724529000  |
| C  | 2.518032000  | -1.745523000 | -0.941862000 |
| H  | 3.107879000  | -0.831732000 | -0.966932000 |
| H  | 2.890300000  | -2.388598000 | -1.754052000 |
| C  | 2.725591000  | -2.408574000 | 0.409344000  |
| H  | 3.794414000  | -2.355950000 | 0.640193000  |
| H  | 2.420220000  | -3.462795000 | 0.425132000  |
| C  | -1.096882000 | -2.690156000 | -1.077775000 |
| C  | 0.349259000  | -2.683634000 | -1.558300000 |
| H  | 0.902475000  | -3.506607000 | -1.102142000 |
| H  | 0.371025000  | -2.853519000 | -2.643127000 |
| C  | 1.004487000  | -0.451102000 | -2.379679000 |
| H  | 1.525543000  | -0.914291000 | -3.231580000 |
| H  | -0.051877000 | -0.336849000 | -2.631341000 |
| C  | 1.629073000  | 0.931885000  | -2.127516000 |
| C  | 0.878598000  | 1.871479000  | -1.177085000 |
| H  | 0.649030000  | -0.183309000 | 3.724982000  |
| C  | -0.152421000 | 2.302435000  | 0.984323000  |
| H  | -1.043067000 | 2.344547000  | 0.357521000  |

|   |              |              |              |   |              |              |              |
|---|--------------|--------------|--------------|---|--------------|--------------|--------------|
| H | 0.208924000  | 3.334690000  | 1.104299000  | H | 1.856308000  | -1.307501000 | -3.338327000 |
| H | -0.164723000 | 1.921369000  | -1.485013000 | C | 2.573253000  | -2.513876000 | -1.252791000 |
| H | 1.324721000  | 2.874214000  | -1.249026000 | H | 3.056369000  | -2.899185000 | -2.164698000 |
| H | 1.611044000  | 1.437666000  | -3.103280000 | H | 3.030742000  | -1.554292000 | -1.020659000 |
| H | 2.687557000  | 0.861059000  | -1.864206000 | C | 2.831436000  | -3.506658000 | -0.112089000 |
| H | -1.660220000 | -1.916003000 | -1.596547000 | H | 3.913220000  | -3.696173000 | -0.110679000 |
| H | -1.553055000 | -3.670452000 | -1.284673000 | H | 2.374052000  | -4.477729000 | -0.326954000 |
| O | -1.407303000 | 0.142878000  | -0.793437000 | C | 2.484279000  | -3.028297000 | 1.299701000  |
| O | 4.697094000  | 0.681659000  | -1.133639000 | H | 2.870793000  | -3.758463000 | 2.027897000  |
| O | 5.528363000  | 1.103839000  | 1.179392000  | H | 2.978830000  | -2.075629000 | 1.476922000  |
| C | 7.291783000  | 0.695894000  | -0.749860000 | C | 0.366637000  | -4.132575000 | 1.712625000  |
| F | 8.273475000  | 0.386466000  | 0.112005000  | H | 0.863077000  | -4.720274000 | 2.499716000  |
| F | 7.373807000  | 2.009631000  | -1.022773000 | H | 0.411603000  | -4.679859000 | 0.772752000  |
| F | 7.509084000  | 0.020193000  | -1.891659000 | H | -0.684738000 | -4.007311000 | 1.958614000  |
| S | 5.628358000  | 0.273620000  | -0.037305000 | N | -0.895810000 | -0.634618000 | 1.799626000  |
| O | 5.698032000  | -1.191669000 | 0.173041000  | N | 1.032731000  | -2.815036000 | 1.575524000  |
| C | -6.976736000 | -2.318319000 | -0.751766000 | S | -1.672164000 | -2.598180000 | -0.288918000 |
| C | -6.870055000 | -1.174925000 | 0.025086000  | C | -2.387567000 | -0.780381000 | 1.626999000  |
| C | -6.049883000 | -0.089197000 | -0.376931000 | H | -2.745678000 | -0.018149000 | 0.940932000  |
| C | -5.332871000 | -0.190116000 | -1.603411000 | H | -2.865562000 | -0.577682000 | -2.597768000 |
| C | -5.455195000 | -1.350715000 | -2.368262000 | C | -2.784282000 | -2.142028000 | 1.092226000  |
| C | -6.266106000 | -2.411847000 | -1.956981000 | H | -3.808126000 | -2.060807000 | 0.713864000  |
| C | -5.930956000 | 1.082870000  | 0.425442000  | H | -2.766013000 | -2.927526000 | 1.858891000  |
| C | -4.451915000 | 0.945960000  | -2.081685000 | C | 0.901132000  | -2.047914000 | 2.850447000  |
| C | -4.344656000 | 2.133763000  | -1.146701000 | C | -0.491851000 | -1.457947000 | 2.985611000  |
| C | -5.089589000 | 2.176132000  | 0.066965000  | H | -1.226286000 | -2.255212000 | 3.105670000  |
| C | -4.966733000 | 3.316836000  | 0.902457000  | H | -0.542546000 | -0.843777000 | 3.894247000  |
| H | -5.542140000 | 3.352059000  | 1.824725000  | C | -0.582224000 | 0.809007000  | 2.051561000  |
| C | -4.138846000 | 4.374030000  | 0.556068000  | H | -1.170948000 | 1.125544000  | 2.925530000  |
| C | -3.405181000 | 4.324567000  | -0.638506000 | H | 0.477800000  | 0.869457000  | 2.301959000  |
| C | -3.515364000 | 3.208618000  | -1.473587000 | C | -0.902410000 | 1.753218000  | 0.887851000  |
| H | -6.501060000 | 1.143758000  | 1.349469000  | C | -0.045823000 | 1.580964000  | -0.365804000 |
| H | -7.613099000 | -3.137662000 | -0.428582000 | H | -0.472549000 | -3.364651000 | -2.419998000 |
| H | -7.422906000 | -1.093557000 | 0.958235000  | C | 0.915821000  | 0.172565000  | -2.082281000 |
| H | -4.910165000 | -1.424666000 | -3.307408000 | H | 1.841357000  | 0.439511000  | -1.575736000 |
| H | -6.348106000 | -3.302992000 | -2.572799000 | H | 0.764467000  | 0.883868000  | -2.907297000 |
| H | -3.439553000 | 0.560231000  | -2.273169000 | H | 1.002209000  | 1.663059000  | -0.088051000 |
| H | -4.064332000 | 5.241587000  | 1.206153000  | H | -0.289324000 | 2.388618000  | -1.071887000 |
| H | -2.760315000 | 5.152084000  | -0.920161000 | H | -0.681926000 | 2.764151000  | 1.257299000  |
| H | -2.951534000 | 3.176580000  | -2.403713000 | H | -1.968282000 | 1.759540000  | 0.645867000  |
| H | -2.022896000 | 0.779590000  | -0.403105000 | H | 1.637802000  | -1.247602000 | 2.818845000  |
| H | -4.820080000 | 1.295813000  | -3.059206000 | H | 1.115025000  | -2.700793000 | 3.710731000  |
|   |              |              |              | O | 1.601822000  | -0.402939000 | 0.738546000  |
|   |              |              |              | O | -4.009399000 | 1.539268000  | -0.009014000 |
|   |              |              |              | O | -4.877741000 | 0.431778000  | -2.067959000 |
|   |              |              |              | C | -6.568780000 | 1.768834000  | -0.534424000 |
|   |              |              |              | F | -7.641657000 | 1.147308000  | -1.049285000 |
|   |              |              |              | F | -6.374683000 | 2.906936000  | -1.222993000 |
|   |              |              |              | F | -6.846866000 | 2.096727000  | 0.739528000  |
|   |              |              |              | S | -5.066156000 | 0.679423000  | -0.624674000 |
|   |              |              |              | O | -5.433613000 | -0.496844000 | 0.198692000  |
|   |              |              |              | C | 5.588417000  | 1.444641000  | -3.400661000 |
|   |              |              |              | C | 4.854333000  | 2.416743000  | -2.719869000 |
|   |              |              |              | C | 4.311495000  | 2.161560000  | -1.457200000 |
|   |              |              |              | C | 4.512650000  | 0.898822000  | -0.856348000 |
|   |              |              |              | C | 5.273414000  | -0.065491000 | -1.545600000 |
|   |              |              |              | C | 5.802891000  | 0.197746000  | -2.805544000 |
|   |              |              |              | C | 3.508737000  | 3.220863000  | -0.731500000 |
|   |              |              |              | C | 3.948312000  | 0.618863000  | 0.481026000  |
|   |              |              |              | C | 3.711206000  | 1.791120000  | 1.349921000  |
|   |              |              |              | C | 3.499518000  | 3.062759000  | 0.775507000  |
|   |              |              |              | C | 3.259898000  | 4.160432000  | 1.607345000  |
|   |              |              |              | H | 3.110501000  | 5.141831000  | 1.162243000  |
|   |              |              |              | C | 3.212447000  | 4.016065000  | 2.994386000  |
|   |              |              |              | C | 3.417020000  | 2.756718000  | 3.567593000  |
|   |              |              |              | C | 3.665447000  | 1.658538000  | 2.750104000  |
|   |              |              |              | H | 3.877306000  | 4.218103000  | -1.001612000 |

## 2<sup>+</sup>+DHA

### <sup>3</sup>TS

Zero-point correction= 0.743538 (Hartree/Particle)

Thermal correction to Energy= 0.785946

Thermal correction to Enthalpy= 0.786890

Thermal correction to Gibbs Free Energy= 0.666315

Sum of electronic and zero-point Energies= -2908.661321

Sum of electronic and thermal Energies= -2908.618914

Sum of electronic and thermal Enthalpies= -2908.617970

Sum of electronic and thermal Free Energies= -2908.7385

|    |              |              |              |
|----|--------------|--------------|--------------|
| Fe | 0.211263000  | -1.366117000 | 0.165203000  |
| C  | -1.505725000 | 0.308111000  | -1.839260000 |
| H  | -1.463878000 | 1.088491000  | -2.611577000 |
| H  | -2.325902000 | 0.548050000  | -1.168411000 |
| H  | -1.715829000 | -0.656803000 | -2.292891000 |
| N  | 1.134962000  | -2.267906000 | -1.565306000 |
| N  | -0.203930000 | 0.283022000  | -1.104331000 |
| C  | 0.558863000  | -3.528496000 | -2.113301000 |
| H  | 0.559979000  | -4.315255000 | -1.362720000 |
| H  | 1.150395000  | -3.853754000 | -2.981699000 |
| C  | 1.007633000  | -1.232763000 | -2.644535000 |
| H  | 0.103392000  | -1.461784000 | -3.210808000 |

|   |             |              |              |
|---|-------------|--------------|--------------|
| H | 6.004124000 | 1.663986000  | -4.380073000 |
| H | 4.706366000 | 3.394971000  | -3.172407000 |
| H | 5.467772000 | -1.023674000 | -1.067957000 |
| H | 6.393709000 | -0.558150000 | -3.315879000 |
| H | 2.718102000 | 0.067799000  | 0.421522000  |
| H | 3.025525000 | 4.881144000  | 3.624341000  |
| H | 3.392969000 | 2.637058000  | 4.647346000  |
| H | 3.842833000 | 0.680839000  | 3.192815000  |
| H | 2.468134000 | 3.190971000  | -1.096793000 |
| H | 4.460684000 | -0.199734000 | 0.997401000  |

### 3IH

Zero-point correction= 0.747014 (Hartree/Particle)  
 Thermal correction to Energy= 0.790679  
 Thermal correction to Enthalpy= 0.791623  
 Thermal correction to Gibbs Free Energy= 0.664970  
 Sum of electronic and zero-point Energies= -2908.701867  
 Sum of electronic and thermal Energies= -2908.658202  
 Sum of electronic and thermal Enthalpies= -2908.657258  
 Sum of electronic and thermal Free Energies= -2908.7839

|    |              |              |              |
|----|--------------|--------------|--------------|
| Fe | 0.036672000  | 0.923129000  | -0.122981000 |
| C  | 1.943311000  | -1.375254000 | -1.051085000 |
| H  | 2.035040000  | -2.457439000 | -1.217966000 |
| H  | 2.812906000  | -1.050483000 | -0.487026000 |
| H  | 1.946434000  | -0.848380000 | -2.001784000 |
| N  | -1.149565000 | 0.499688000  | -1.910406000 |
| N  | 0.682273000  | -1.104130000 | -0.294133000 |
| C  | -0.840979000 | 1.282188000  | -3.141115000 |
| H  | -0.970794000 | 2.347659000  | -2.967265000 |
| H  | -1.507216000 | 0.964777000  | -3.957316000 |
| C  | -0.856724000 | -0.934537000 | -2.234021000 |
| H  | -0.036696000 | -0.944887000 | -2.953878000 |
| H  | -1.725107000 | -1.397371000 | -2.724125000 |
| C  | -2.599382000 | 0.685722000  | -1.609635000 |
| H  | -3.171771000 | 0.423059000  | -2.513675000 |
| H  | -2.892822000 | -0.026300000 | -0.836861000 |
| C  | -2.993586000 | 2.103848000  | -1.179677000 |
| H  | -4.089153000 | 2.110115000  | -1.120109000 |
| H  | -2.740235000 | 2.829189000  | -1.959652000 |
| C  | -2.497131000 | 2.562166000  | 0.193094000  |
| H  | -2.988569000 | 3.514467000  | 0.445558000  |
| H  | -2.787423000 | 1.819622000  | 0.933029000  |
| C  | -0.618179000 | 3.987523000  | -0.381202000 |
| H  | -1.193744000 | 4.844454000  | 0.000494000  |
| H  | -0.799378000 | 3.879816000  | -1.449197000 |
| H  | 0.444996000  | 4.176113000  | -0.254606000 |
| N  | 1.290279000  | 1.413156000  | 1.475804000  |
| N  | -1.019253000 | 2.753098000  | 0.335459000  |
| S  | 1.617808000  | 1.868453000  | -1.448525000 |
| C  | 2.719065000  | 1.643081000  | 1.051738000  |
| H  | 3.200942000  | 0.685359000  | 0.875357000  |
| H  | 3.256012000  | 2.115199000  | 1.888867000  |
| C  | 2.822876000  | 2.479423000  | -0.209674000 |
| H  | 3.833590000  | 2.348693000  | -0.608702000 |
| H  | 2.663201000  | 3.550419000  | -0.029178000 |
| C  | -0.712045000 | 2.888403000  | 1.791233000  |
| C  | 0.772115000  | 2.697732000  | 2.047137000  |
| H  | 1.339310000  | 3.516733000  | 1.602830000  |
| H  | 0.967546000  | 2.729034000  | 3.127243000  |
| C  | 1.258318000  | 0.344965000  | 2.525514000  |
| H  | 1.920284000  | 0.666773000  | 3.343550000  |
| H  | 0.234545000  | 0.295762000  | 2.898757000  |
| C  | 1.710738000  | -1.042960000 | 2.057832000  |
| C  | 0.791699000  | -1.746683000 | 1.060220000  |
| H  | 0.193723000  | 1.118663000  | -3.436334000 |

|   |              |              |              |
|---|--------------|--------------|--------------|
| C | -0.459764000 | -1.740288000 | -1.011146000 |
| H | -1.297588000 | -1.841892000 | -0.321338000 |
| H | -0.185412000 | -2.757692000 | -1.324713000 |
| H | -0.213962000 | -1.792953000 | 1.473815000  |
| H | 1.156971000  | -2.772656000 | 0.906674000  |
| H | 1.709341000  | -1.674531000 | 2.957313000  |
| H | 2.747641000  | -1.039850000 | 1.711656000  |
| H | -1.278412000 | 2.114512000  | 2.305634000  |
| H | -1.033926000 | 3.875338000  | 2.157429000  |
| O | -1.213582000 | 0.239128000  | 1.117180000  |
| O | 4.700563000  | -0.947731000 | 0.791397000  |
| O | 5.265124000  | -1.138201000 | -1.630481000 |
| C | 7.235377000  | -1.088923000 | 0.133235000  |
| F | 8.149394000  | -0.743690000 | -0.787824000 |
| F | 7.239768000  | -2.428809000 | 0.243914000  |
| F | 7.618015000  | -0.573943000 | 1.314930000  |
| S | 5.548736000  | -0.471730000 | -0.343787000 |
| O | 5.713144000  | 1.000323000  | -0.391306000 |
| C | -7.138258000 | 1.633920000  | -0.313537000 |
| C | -6.842202000 | 0.411050000  | -0.924241000 |
| C | -6.054462000 | -0.546058000 | -0.285120000 |
| C | -5.526948000 | -0.264599000 | 1.007827000  |
| C | -5.846489000 | 0.975685000  | 1.617766000  |
| C | -6.640536000 | 1.909636000  | 0.968255000  |
| C | -5.812278000 | -1.897711000 | -0.925005000 |
| C | -4.668222000 | -1.206215000 | 1.647958000  |
| C | -4.223164000 | -2.396905000 | 1.001218000  |
| C | -4.716502000 | -2.731383000 | -0.293029000 |
| C | -4.227056000 | -3.867272000 | -0.937353000 |
| H | -4.604127000 | -4.120216000 | -1.926457000 |
| C | -3.277262000 | -4.694604000 | -0.329890000 |
| C | -2.803614000 | -4.385206000 | 0.953181000  |
| C | -3.266818000 | -3.252720000 | 1.607374000  |
| H | -6.752350000 | -2.473924000 | -0.873435000 |
| H | -7.759073000 | 2.361643000  | -0.828212000 |
| H | -7.242751000 | 0.194542000  | -1.912735000 |
| H | -5.454377000 | 1.185436000  | 2.610172000  |
| H | -6.877203000 | 2.852636000  | 1.453487000  |
| H | -1.885784000 | -0.351536000 | 0.752527000  |
| H | -2.915561000 | -5.577819000 | -0.848380000 |
| H | -2.074079000 | -5.030178000 | -1.434979000 |
| H | -2.899101000 | -3.004447000 | 2.600079000  |
| H | -5.620001000 | -1.775792000 | -1.999978000 |
| H | -4.288138000 | -0.977581000 | 2.640321000  |

### 5TS

Zero-point correction= 0.739867 (Hartree/Particle)  
 Thermal correction to Energy= 0.782502  
 Thermal correction to Enthalpy= 0.783446  
 Thermal correction to Gibbs Free Energy= 0.663228  
 Sum of electronic and zero-point Energies= -2908.673525  
 Sum of electronic and thermal Energies= -2908.630891  
 Sum of electronic and thermal Enthalpies= -2908.629946  
 Sum of electronic and thermal Free Energies= -2908.7501

|    |              |              |              |
|----|--------------|--------------|--------------|
| Fe | -0.051412000 | -0.130522000 | 0.940305000  |
| C  | 2.116132000  | 2.090483000  | 0.116202000  |
| H  | 2.284397000  | 3.075362000  | -0.344515000 |
| H  | 2.859975000  | 1.399860000  | -0.276280000 |
| H  | 2.264965000  | 2.155285000  | 1.192829000  |
| N  | -0.822776000 | 1.451295000  | 2.382093000  |
| N  | 0.739788000  | 1.621450000  | -0.195357000 |
| C  | -0.285015000 | 1.477017000  | 3.764089000  |
| H  | -0.469881000 | 0.528789000  | 4.266360000  |
| H  | -0.753913000 | 2.289409000  | 4.340493000  |
| C  | -0.445621000 | 2.738873000  | 1.713489000  |

|   |              |              |              |
|---|--------------|--------------|--------------|
| H | 0.491135000  | 3.070523000  | 2.165429000  |
| H | -1.200343000 | 3.507417000  | 1.936326000  |
| C | -2.303981000 | 1.268444000  | 2.421279000  |
| H | -2.725399000 | 2.063236000  | 3.059015000  |
| H | -2.680839000 | 1.411715000  | 1.408029000  |
| C | -2.796260000 | -0.088286000 | 2.965230000  |
| H | -3.870831000 | 0.043224000  | 3.151067000  |
| H | -2.365375000 | -0.289794000 | 3.951432000  |
| C | -2.685644000 | -1.325416000 | 2.056024000  |
| H | -3.292279000 | -2.133030000 | 2.498183000  |
| H | -3.108847000 | -1.085541000 | 1.082596000  |
| C | -0.814135000 | -2.533407000 | 3.026304000  |
| H | -1.476931000 | -3.375931000 | 3.281388000  |
| H | -0.771121000 | -1.842953000 | 3.868490000  |
| H | 0.197283000  | -2.902605000 | 2.868007000  |
| N | 0.885599000  | -1.704833000 | -0.258013000 |
| N | -1.307934000 | -1.838550000 | 1.821283000  |
| S | 1.775373000  | -0.492376000 | 2.393318000  |
| C | 2.344163000  | -1.878599000 | 0.050024000  |
| H | 2.903487000  | -1.071676000 | -0.418573000 |
| H | 2.694402000  | -2.815757000 | -0.410707000 |
| C | 2.645890000  | -1.868610000 | 1.540925000  |
| H | 3.724208000  | -1.716038000 | 1.649288000  |
| H | 2.382595000  | -2.812589000 | 2.034848000  |
| C | -1.275336000 | -2.744948000 | 0.639105000  |
| C | 0.143598000  | -2.956209000 | 0.091683000  |
| H | 0.743594000  | -3.495032000 | 0.826874000  |
| H | 0.078305000  | -3.603948000 | -0.793871000 |
| C | 0.699686000  | -1.337048000 | -1.697430000 |
| H | 1.174483000  | -2.122637000 | -2.306069000 |
| H | -0.374625000 | -1.357942000 | -1.893557000 |
| C | 1.295486000  | 0.016430000  | -2.134445000 |
| C | 0.618984000  | 1.311519000  | -1.654279000 |
| H | 0.793887000  | 1.628928000  | 3.737681000  |
| C | -0.267253000 | 2.643838000  | 0.195699000  |
| H | -1.213931000 | 2.382885000  | -0.275299000 |
| H | 0.039627000  | 3.635734000  | -0.171664000 |
| H | -0.445466000 | 1.272676000  | -1.884258000 |
| H | 1.060271000  | 2.149219000  | -2.216048000 |
| H | 1.193199000  | 0.030086000  | -3.228852000 |
| H | 2.373034000  | 0.052387000  | -1.953541000 |
| H | -1.906972000 | -2.302933000 | -0.129432000 |
| H | -1.693761000 | -3.730223000 | 0.900945000  |
| O | -1.443211000 | 0.025592000  | -0.131692000 |
| O | 4.415472000  | 0.195646000  | -1.437261000 |
| O | 5.498606000  | 1.524952000  | 0.374045000  |
| C | 7.035771000  | 0.236931000  | -1.351394000 |
| F | 8.105354000  | 0.274646000  | -0.540996000 |
| F | 7.094788000  | 1.300340000  | -2.171560000 |
| F | 7.121009000  | -0.873609000 | -2.104857000 |
| S | 5.459256000  | 0.249770000  | -0.367523000 |
| O | 5.543216000  | -0.986179000 | 0.445995000  |
| C | -5.548490000 | -3.398458000 | -1.837651000 |
| C | -5.985740000 | -2.312865000 | -1.077623000 |
| C | -5.278504000 | -1.107088000 | -1.067720000 |
| C | -4.110871000 | -0.981578000 | -1.851323000 |
| C | -3.683023000 | -2.081501000 | -2.619092000 |
| C | -4.389854000 | -3.280228000 | -2.612393000 |
| C | -5.738645000 | 0.054729000  | -0.210991000 |
| C | -3.351095000 | 0.285261000  | -1.844771000 |
| C | -4.102976000 | 1.506067000  | -1.488425000 |
| C | -5.269395000 | 1.410046000  | -0.698945000 |
| C | -5.969897000 | 2.572447000  | -0.363916000 |
| H | -6.877737000 | 2.492897000  | 0.230602000  |
| C | -5.527941000 | 3.827055000  | -0.786005000 |
| C | -4.372030000 | 3.927574000  | -1.567071000 |
| C | -3.671748000 | 2.776535000  | -1.915298000 |

|   |              |              |              |
|---|--------------|--------------|--------------|
| H | -6.832302000 | 0.045835000  | -0.124318000 |
| H | -6.113286000 | -4.326484000 | -1.834700000 |
| H | -6.894380000 | -2.400751000 | -0.485548000 |
| H | -2.794518000 | -1.978441000 | -3.238433000 |
| H | -4.049421000 | -4.115307000 | -3.218499000 |
| H | -2.402587000 | 0.146584000  | -0.935014000 |
| H | -6.087631000 | 4.718807000  | -0.518104000 |
| H | -4.028263000 | 4.898318000  | -1.913529000 |
| H | -2.785392000 | 2.849731000  | -2.541718000 |
| H | -5.369381000 | -0.097454000 | 0.818587000  |
| H | -2.714110000 | 0.411393000  | -2.726305000 |

### <sup>5</sup>IH

Zero-point correction= 0.742314 (Hartree/Particle)

Thermal correction to Energy= 0.787517

Thermal correction to Enthalpy= 0.788461

Thermal correction to Gibbs Free Energy= 0.657827

Sum of electronic and zero-point Energies= -2908.704213

Sum of electronic and thermal Energies= -2908.659010

Sum of electronic and thermal Enthalpies= -2908.658066

Sum of electronic and thermal Free Energies= -2908.7887

|    |              |              |              |
|----|--------------|--------------|--------------|
| Fe | -0.086546000 | -0.658525000 | 0.349338000  |
| C  | -2.452778000 | -1.554048000 | -1.605799000 |
| H  | -2.742833000 | -1.866850000 | -2.620201000 |
| H  | -3.167666000 | -0.809169000 | -1.261214000 |
| H  | -2.515649000 | -2.405512000 | -0.928972000 |
| N  | 0.693556000  | -2.782102000 | 0.061009000  |
| N  | -1.074608000 | -0.997607000 | -1.624258000 |
| C  | 0.274416000  | -3.826979000 | 1.024078000  |
| H  | 0.580024000  | -3.562100000 | 2.035667000  |
| H  | 0.718495000  | -4.798776000 | 0.757724000  |
| C  | 0.167606000  | -3.155376000 | -1.293251000 |
| H  | -0.754144000 | -3.718222000 | -1.132065000 |
| H  | 0.874777000  | -3.836388000 | -1.790618000 |
| C  | 2.182516000  | -2.659977000 | 0.050919000  |
| H  | 2.601699000  | -3.655658000 | -0.170291000 |
| H  | 2.446586000  | -1.984812000 | -0.763220000 |
| C  | 2.832312000  | -2.155512000 | 1.356557000  |
| H  | 3.901649000  | -2.381825000 | -2.550290000 |
| H  | 2.495045000  | -2.747921000 | 2.213589000  |
| C  | 2.771075000  | -0.650991000 | 1.681106000  |
| H  | 3.464556000  | -0.455354000 | 2.515944000  |
| H  | 3.150765000  | -0.096888000 | 0.824153000  |
| C  | 1.087256000  | -0.518746000 | 3.413396000  |
| H  | 1.838178000  | -0.137963000 | 4.124946000  |
| H  | 1.045080000  | -1.605590000 | 3.484847000  |
| H  | 0.104376000  | -0.143266000 | 3.691541000  |
| N  | -0.946032000 | 1.325303000  | 0.798586000  |
| N  | 1.429089000  | -0.112344000 | 2.035270000  |
| S  | -1.730328000 | -1.445744000 | 1.850903000  |
| C  | -2.348698000 | 1.226592000  | 1.312533000  |
| H  | -3.018654000 | 1.025903000  | 0.478323000  |
| H  | -2.648494000 | 2.200099000  | 1.731882000  |
| C  | -2.539297000 | 0.126368000  | 2.350101000  |
| H  | -3.615724000 | -0.054638000 | 2.434926000  |
| H  | -2.161462000 | 0.404017000  | 3.342505000  |
| C  | 1.372866000  | 1.370794000  | 1.906895000  |
| C  | -0.063021000 | 1.918508000  | 1.849336000  |
| H  | -0.548620000 | 1.753027000  | 2.812700000  |
| H  | -0.005541000 | 3.008023000  | 1.713055000  |
| C  | -0.906550000 | 2.116888000  | -0.472906000 |
| H  | -1.349591000 | 3.103861000  | -0.264814000 |
| H  | 0.145814000  | 2.261161000  | -0.726583000 |
| C  | -1.657246000 | 1.510497000  | -1.677645000 |
| C  | -1.047876000 | 0.289527000  | -2.389329000 |

|   |              |              |              |   |              |              |              |
|---|--------------|--------------|--------------|---|--------------|--------------|--------------|
| H | -0.812432000 | -3.915035000 | 1.021974000  | C | 2.466136000  | 0.043873000  | -1.100491000 |
| C | -0.118661000 | -1.970251000 | -2.221807000 | C | 3.339915000  | -2.347566000 | -2.164795000 |
| H | 0.803029000  | -1.430912000 | -2.434878000 | H | 1.386405000  | -3.032370000 | -1.496951000 |
| H | -0.523775000 | -2.369373000 | -3.165412000 | C | 3.731969000  | -0.025479000 | -1.683503000 |
| H | -0.004385000 | 0.493467000  | -2.625197000 | H | 3.662043000  | -3.306620000 | -2.550835000 |
| H | -1.600487000 | 0.137531000  | -3.329444000 | H | 4.398353000  | 0.826454000  | -1.702685000 |
| H | -1.661146000 | 2.307624000  | -2.434563000 | C | 4.177406000  | -1.231300000 | -2.215292000 |
| H | -2.711746000 | 1.340793000  | -1.444355000 | C | 1.916546000  | 1.275286000  | -0.502924000 |
| H | 1.914780000  | 1.659698000  | 1.007334000  | C | 0.066102000  | 2.278869000  | 0.518735000  |
| H | 1.885333000  | 1.850998000  | 2.756752000  | C | 2.615716000  | 2.479605000  | -0.459702000 |
| O | 1.271780000  | 0.044741000  | -0.818033000 | C | 0.705118000  | 3.513945000  | 0.576358000  |
| O | -4.723460000 | 0.839126000  | -0.912631000 | H | -0.952003000 | 2.191247000  | 0.875992000  |
| O | -5.714553000 | -1.419137000 | -0.534772000 | H | 3.628269000  | 2.562391000  | -0.832136000 |
| C | -7.319600000 | 0.683301000  | -0.572834000 | H | 0.174256000  | 4.366150000  | 0.981263000  |
| F | -8.303265000 | 0.035976000  | 0.072087000  | C | 2.006538000  | 3.610461000  | 0.086335000  |
| F | -7.535178000 | 0.561401000  | -1.894057000 | C | 2.785846000  | 4.889134000  | 0.093748000  |
| F | -7.401133000 | 1.988018000  | -0.257604000 | O | 2.142366000  | 5.879216000  | 0.744211000  |
| S | -5.657838000 | -0.007284000 | -0.109042000 | O | 3.871263000  | 5.023204000  | -0.428222000 |
| O | -5.575055000 | 0.233998000  | 1.351334000  | H | 2.713966000  | 6.668062000  | 0.687206000  |
| C | 3.118008000  | 4.192723000  | -0.842240000 | C | 5.551511000  | -1.267840000 | -2.805232000 |
| C | 3.344647000  | 3.030887000  | -1.566703000 | O | 5.949598000  | -2.522997000 | -3.104177000 |
| C | 4.324990000  | 2.090767000  | -1.153976000 | O | 6.226636000  | -0.284330000 | -3.011217000 |
| C | 5.088714000  | 2.368826000  | 0.016449000  | H | 6.860049000  | -2.446512000 | -3.446788000 |
| C | 4.837017000  | 3.537613000  | 0.734020000  | C | -0.664904000 | -0.822597000 | 2.820685000  |
| C | 3.861160000  | 4.449256000  | 0.318994000  | C | 1.542983000  | -1.482397000 | 2.368426000  |
| C | 4.525977000  | 0.869168000  | -1.862887000 | C | -0.442881000 | -0.952360000 | 4.189892000  |
| C | 6.204538000  | 1.432088000  | 0.431200000  | C | 1.826310000  | -1.609389000 | -3.730794000 |
| C | 6.177089000  | 0.062332000  | -0.215143000 | H | 2.303345000  | -1.699156000 | 1.625330000  |
| C | 5.390687000  | -0.157940000 | -1.382120000 | H | -1.239118000 | -0.738226000 | 4.893876000  |
| C | 5.457809000  | -1.423277000 | -2.019543000 | H | 2.833688000  | -1.886900000 | 4.023037000  |
| H | 4.867825000  | -1.586849000 | -2.918329000 | C | -2.964240000 | 0.196921000  | 0.161854000  |
| C | 6.254084000  | -2.439189000 | -1.511326000 | C | -1.940930000 | -0.368613000 | 2.229640000  |
| C | 7.006375000  | -2.222258000 | -0.348024000 | C | -4.127969000 | 0.600326000  | 0.818993000  |
| C | 6.961986000  | -0.976059000 | 0.284973000  | C | -3.086213000 | 0.021041000  | 2.926532000  |
| H | 2.056987000  | 0.568664000  | -0.620484000 | H | -4.937616000 | 1.066275000  | 0.275662000  |
| H | 2.367223000  | 4.903120000  | -1.177226000 | H | -3.115130000 | -0.016227000 | 4.009278000  |
| H | 2.768141000  | 2.823743000  | -2.464852000 | C | -2.694396000 | 0.304643000  | -1.287115000 |
| H | 5.420545000  | 3.746919000  | 1.628461000  | C | -1.116932000 | -0.014633000 | -2.987679000 |
| H | 3.687070000  | 5.356137000  | 0.890912000  | C | -3.607714000 | 0.826300000  | -2.204912000 |
| H | 7.165626000  | 1.911613000  | 0.176060000  | C | -1.991424000 | 0.475532000  | -3.951085000 |
| H | 6.294397000  | -3.401238000 | -2.014813000 | H | -0.117222000 | -0.349817000 | -3.239675000 |
| H | 7.629039000  | -3.014843000 | 0.056905000  | H | -4.552399000 | 1.225834000  | -1.860981000 |
| H | 7.559079000  | -0.807028000 | 1.178970000  | H | -1.675395000 | 0.531042000  | -4.987147000 |
| H | 3.940782000  | 0.683720000  | -2.759656000 | C | -3.253228000 | 0.909875000  | -3.547387000 |
| H | 6.224333000  | 1.331855000  | 1.525015000  | C | -4.182212000 | 0.496219000  | 2.208293000  |

### 1+EB<sub>0</sub>

#### <sup>3</sup>TS<sub>0</sub>

Zero-point correction= 0.614203 (Hartree/Particle)

Thermal correction to Energy= 0.665733

Thermal correction to Enthalpy= 0.666677

Thermal correction to Gibbs Free Energy= 0.518269

Sum of electronic and zero-point Energies= -3615.818854

Sum of electronic and thermal Energies= -3615.767324

Sum of electronic and thermal Enthalpies= -3615.766380

Sum of electronic and thermal Free Energies= -3615.9147

|    |              |              |              |
|----|--------------|--------------|--------------|
| Ru | -0.239223000 | -0.785417000 | -0.090339000 |
| N  | 0.339649000  | -1.090397000 | 1.929070000  |
| N  | -1.931109000 | -0.301146000 | 0.878245000  |
| N  | -1.455181000 | -0.101313000 | -1.692545000 |
| N  | 1.656717000  | -1.045711000 | -1.067604000 |
| N  | 0.654753000  | 1.187883000  | 0.002160000  |
| O  | -0.562989000 | -2.616041000 | -0.442128000 |
| C  | 2.087439000  | -2.209835000 | -1.582539000 |

|    |              |              |              |
|----|--------------|--------------|--------------|
| C  | 2.466136000  | 0.043873000  | -1.100491000 |
| C  | 3.339915000  | -2.347566000 | -2.164795000 |
| H  | 1.386405000  | -3.032370000 | -1.496951000 |
| C  | 3.731969000  | -0.025479000 | -1.683503000 |
| H  | 3.662043000  | -3.306620000 | -2.550835000 |
| H  | 4.398353000  | 0.826454000  | -1.702685000 |
| C  | 4.177406000  | -1.231300000 | -2.215292000 |
| C  | 1.916546000  | 1.275286000  | -0.502924000 |
| C  | 0.066102000  | 2.278869000  | 0.518735000  |
| C  | 2.615716000  | 2.479605000  | -0.459702000 |
| C  | 0.705118000  | 3.513945000  | 0.576358000  |
| H  | -0.952003000 | 2.191247000  | 0.875992000  |
| H  | 3.628269000  | 2.562391000  | -0.832136000 |
| H  | 0.174256000  | 4.366150000  | 0.981263000  |
| C  | 2.006538000  | 3.610461000  | 0.086335000  |
| C  | 2.785846000  | 4.889134000  | 0.093748000  |
| O  | 2.142366000  | 5.879216000  | 0.744211000  |
| O  | 3.871263000  | 5.023204000  | -0.428222000 |
| H  | 2.713966000  | 6.668062000  | 0.687206000  |
| C  | 5.551511000  | -1.267840000 | -2.805232000 |
| O  | 5.949598000  | -2.522997000 | -3.104177000 |
| O  | 6.226636000  | -0.284330000 | -3.011217000 |
| H  | 6.860049000  | -2.446512000 | -3.446788000 |
| C  | -0.664904000 | -0.822597000 | 2.820685000  |
| C  | 1.542983000  | -1.482397000 | 2.368426000  |
| C  | -0.442881000 | -0.952360000 | 4.189892000  |
| C  | 1.826310000  | -1.609389000 | -3.730794000 |
| H  | 2.303345000  | -1.699156000 | 1.625330000  |
| H  | -1.239118000 | -0.738226000 | 4.893876000  |
| H  | 2.833688000  | -1.886900000 | 4.023037000  |
| C  | -2.964240000 | 0.196921000  | 0.161854000  |
| C  | -1.940930000 | -0.368613000 | 2.229640000  |
| C  | -4.127969000 | 0.600326000  | 0.818993000  |
| C  | -3.086213000 | 0.021041000  | 2.926532000  |
| H  | -4.937616000 | 1.066275000  | 0.275662000  |
| H  | -3.115130000 | -0.016227000 | 4.009278000  |
| C  | -2.694396000 | 0.304643000  | -1.287115000 |
| C  | -1.116932000 | -0.014633000 | -2.987679000 |
| C  | -3.607714000 | 0.826300000  | -2.204912000 |
| C  | -1.991424000 | 0.475532000  | -3.951085000 |
| H  | -0.117222000 | -0.349817000 | -3.239675000 |
| H  | -4.552399000 | 1.225834000  | -1.860981000 |
| H  | -1.675395000 | 0.531042000  | -4.987147000 |
| C  | -3.253228000 | 0.909875000  | -3.547387000 |
| C  | -4.182212000 | 0.496219000  | 2.208293000  |
| C  | 0.818343000  | -1.341984000 | 4.649610000  |
| H  | -3.949506000 | 1.331255000  | -4.265414000 |
| H  | -5.069036000 | 0.832196000  | 2.735211000  |
| H  | 1.002983000  | -1.425900000 | 5.716352000  |
| Cl | -3.255447000 | 3.919794000  | -0.136458000 |
| Cl | 4.932072000  | -0.990150000 | 1.525984000  |
| O  | 6.152409000  | -0.734285000 | 0.717811000  |
| O  | 4.155674000  | -2.131250000 | 0.902962000  |
| O  | 5.270639000  | -1.345357000 | 2.933810000  |
| O  | 4.046003000  | 0.229295000  | 1.516760000  |
| O  | -3.347296000 | 5.396670000  | -0.136952000 |
| O  | -2.804973000 | 3.427462000  | 1.217693000  |
| O  | -4.597720000 | 3.314010000  | -0.450481000 |
| O  | -2.259927000 | 3.451934000  | -1.161422000 |
| C  | -4.600063000 | -3.037284000 | -0.417400000 |
| C  | -3.961995000 | -3.124823000 | 0.839232000  |
| C  | -2.646409000 | -3.527478000 | 0.956754000  |
| C  | -1.846874000 | -3.822562000 | -0.209684000 |
| C  | -2.547637000 | -3.815678000 | -1.477785000 |
| C  | -3.855964000 | -3.397167000 | -1.567564000 |
| H  | -4.532487000 | -2.888582000 | 1.734979000  |
| H  | -2.188836000 | -3.628906000 | 1.936832000  |



|   |              |              |              |
|---|--------------|--------------|--------------|
| H | -1.085157000 | -4.588443000 | -0.081276000 |
| H | -2.003929000 | -4.118966000 | -2.367695000 |
| H | -4.344957000 | -3.369054000 | -2.539286000 |
| C | -6.055883000 | -2.651700000 | -0.526840000 |
| H | -6.316262000 | -1.960975000 | 0.284967000  |
| H | -6.224057000 | -2.110353000 | -1.466750000 |
| C | -7.000722000 | -3.869695000 | -0.474187000 |
| H | -8.045934000 | -3.551842000 | -0.557933000 |
| H | -6.789693000 | -4.566709000 | -1.292601000 |
| H | -6.884439000 | -4.416308000 | 0.468088000  |

**1'+EB<sub>0</sub>**

**<sup>3</sup>TS<sub>0</sub>**

Zero-point correction= 0.615344 (Hartree/Particle)  
 Thermal correction to Energy= 0.666639  
 Thermal correction to Enthalpy= 0.667583  
 Thermal correction to Gibbs Free Energy= 0.519842  
 Sum of electronic and zero-point Energies= -3645.37445  
 Sum of electronic and thermal Energies= -3645.323162  
 Sum of electronic and thermal Enthalpies= -3645.322217  
 Sum of electronic and thermal Free Energies= -3645.4699

|    |              |              |              |
|----|--------------|--------------|--------------|
| Fe | -0.141204000 | -0.617737000 | 0.462517000  |
| N  | -0.583872000 | -1.111739000 | 2.404785000  |
| N  | -1.645423000 | -1.757220000 | 0.150493000  |
| N  | -0.279937000 | -0.406597000 | -1.518893000 |
| N  | 1.296783000  | 0.746612000  | 0.853213000  |
| N  | -1.281989000 | 1.135453000  | 0.640445000  |
| O  | 1.044111000  | -1.886596000 | 0.467090000  |
| C  | 2.599147000  | 0.438024000  | 0.942605000  |
| C  | 0.903267000  | 2.042445000  | 0.974353000  |
| C  | 3.576914000  | 1.402559000  | 1.176414000  |
| H  | 2.836316000  | -0.608620000 | 0.804128000  |
| C  | 1.830244000  | 3.055535000  | 1.199004000  |
| H  | 4.621619000  | 1.124110000  | 1.196303000  |
| H  | 1.536328000  | 4.095148000  | 1.274778000  |
| C  | 3.184110000  | 2.732531000  | 1.300350000  |
| C  | -0.548647000 | 2.261200000  | 0.846187000  |
| C  | -2.613182000 | 1.229140000  | 0.514182000  |
| C  | -1.157083000 | 3.512008000  | 0.924765000  |
| C  | -3.288574000 | 2.448681000  | 0.576119000  |
| H  | -3.183094000 | 0.322517000  | 0.354257000  |
| H  | -0.583533000 | 4.417148000  | 1.083211000  |
| H  | -4.364446000 | 2.462695000  | 0.448592000  |
| C  | -2.544310000 | 3.608352000  | 0.785409000  |
| C  | -3.160081000 | 4.971383000  | 0.872188000  |
| O  | -4.494890000 | 4.944000000  | 0.700040000  |
| O  | -2.527562000 | 5.985160000  | 1.078500000  |
| H  | -4.807388000 | 5.866524000  | 0.760839000  |
| C  | 4.158504000  | 3.852345000  | 1.496212000  |
| O  | 5.416934000  | 3.415213000  | 1.679834000  |
| O  | 3.840485000  | 5.022254000  | 1.509246000  |
| H  | 5.984773000  | 4.207248000  | 1.724970000  |
| C  | -1.599254000 | -2.012258000 | 2.493268000  |
| C  | 0.044821000  | -0.715337000 | 3.515990000  |
| C  | -2.004788000 | -2.520222000 | 3.728529000  |
| C  | -0.307271000 | -1.182625000 | 4.780894000  |
| H  | 0.854556000  | -0.008056000 | 3.377450000  |
| H  | -2.820487000 | -3.231849000 | 3.785016000  |
| H  | 0.229216000  | -0.831337000 | 5.655520000  |
| C  | -2.083092000 | -1.906584000 | -1.111048000 |
| C  | -2.212375000 | -2.381208000 | 1.200254000  |
| C  | -3.150635000 | -2.767653000 | -1.377810000 |
| C  | -3.279632000 | -3.252138000 | 0.992097000  |
| H  | -3.552712000 | -2.866547000 | -2.376774000 |
| H  | -3.764566000 | -3.752330000 | 1.822010000  |

|    |              |              |              |
|----|--------------|--------------|--------------|
| C  | -1.329959000 | -1.081438000 | -2.071658000 |
| C  | 0.490152000  | 0.369238000  | -2.292662000 |
| C  | -1.637333000 | -0.960392000 | -3.423183000 |
| C  | 0.247692000  | 0.514277000  | -3.660760000 |
| H  | 1.320396000  | 0.892694000  | -1.832714000 |
| H  | -2.507957000 | -1.461330000 | -3.828226000 |
| H  | 0.911266000  | 1.150542000  | -4.236095000 |
| C  | -0.833175000 | -0.151563000 | -4.229412000 |
| C  | -3.745757000 | -3.436489000 | -0.312005000 |
| C  | -1.351987000 | -2.098955000 | 4.885275000  |
| H  | -1.060598000 | -0.042098000 | -5.285315000 |
| H  | -4.606708000 | -0.068778000 | -0.495347000 |
| H  | -1.657110000 | -2.483295000 | 5.853705000  |
| Cl | 4.027646000  | 1.689766000  | -2.253432000 |
| O  | 4.393630000  | 1.769465000  | -3.688591000 |
| O  | 5.086708000  | 2.288191000  | -1.388456000 |
| O  | 3.823234000  | 0.246906000  | -1.855278000 |
| O  | 2.727391000  | 2.423049000  | -2.016630000 |
| Cl | -5.533536000 | -0.395610000 | -1.153901000 |
| O  | -5.106228000 | -0.565913000 | -0.287192000 |
| O  | -4.317283000 | 0.007181000  | -1.951493000 |
| O  | -6.571705000 | 0.658543000  | -1.244245000 |
| O  | -6.041781000 | -1.703804000 | -1.667884000 |
| C  | 3.908071000  | -4.308391000 | -0.137593000 |
| C  | 3.851751000  | -3.179320000 | -0.985936000 |
| C  | 2.646781000  | -2.634106000 | -1.378380000 |
| C  | 1.410203000  | -3.143760000 | -0.846834000 |
| C  | 1.474361000  | -4.361831000 | -0.084594000 |
| C  | 2.691697000  | -4.891748000 | 0.288200000  |
| H  | 4.774208000  | -2.736998000 | -1.353958000 |
| H  | 2.640064000  | -1.766544000 | -2.028998000 |
| H  | 0.505308000  | -2.959490000 | -1.414759000 |
| H  | 0.548511000  | -4.834365000 | 0.232013000  |
| H  | 2.725262000  | -5.791588000 | 0.899025000  |
| C  | 5.234943000  | -4.867516000 | 0.314282000  |
| H  | 5.132697000  | -5.940372000 | 0.521087000  |
| H  | 5.968930000  | -4.768307000 | -0.495261000 |
| C  | 5.779902000  | -4.160342000 | 1.571931000  |
| H  | 6.743267000  | -4.589354000 | 1.869677000  |
| H  | 5.926517000  | -3.090679000 | 1.386408000  |
| H  | 5.084933000  | -4.263982000 | 2.412997000  |

**<sup>5</sup>TS<sub>0</sub>**

Zero-point correction= 0.613210 (Hartree/Particle)  
 Thermal correction to Energy= 0.665767  
 Thermal correction to Enthalpy= 0.666712  
 Thermal correction to Gibbs Free Energy= 0.514535  
 Sum of electronic and zero-point Energies= -3645.38023  
 Sum of electronic and thermal Energies= -3645.327679  
 Sum of electronic and thermal Enthalpies= -3645.326735  
 Sum of electronic and thermal Free Energies= -3645.4789

|    |              |              |              |
|----|--------------|--------------|--------------|
| Fe | 0.090936000  | -0.293320000 | 0.597257000  |
| N  | -1.496053000 | -0.412140000 | 2.114051000  |
| N  | -1.187619000 | -1.894978000 | -0.029422000 |
| N  | 0.869821000  | -0.943456000 | -1.354951000 |
| N  | 0.971744000  | 1.674226000  | 0.827208000  |
| N  | -1.326553000 | 1.206119000  | -0.446644000 |
| O  | 1.270091000  | -1.081523000 | 1.580707000  |
| C  | 2.173995000  | 1.814340000  | 1.404798000  |
| C  | 0.351622000  | 2.758671000  | 0.292557000  |
| C  | 2.824130000  | 3.043434000  | 1.501199000  |
| H  | 2.633556000  | 0.906915000  | 1.769534000  |
| C  | 0.938146000  | 4.019566000  | 0.366363000  |
| H  | 3.816195000  | 3.091493000  | 1.929685000  |
| H  | 0.465597000  | 4.897281000  | -0.056491000 |

|    |              |              |              |   |             |              |              |
|----|--------------|--------------|--------------|---|-------------|--------------|--------------|
| C  | 2.184906000  | 4.164889000  | 0.981429000  | C | 4.566602000 | -6.158823000 | -0.539520000 |
| C  | -0.951661000 | 2.506140000  | -0.365397000 | H | 4.739185000 | -6.891134000 | -1.335878000 |
| C  | -2.496318000 | 0.900886000  | -1.019943000 | H | 5.486686000 | -5.581468000 | -0.401107000 |
| C  | -1.755505000 | 3.525926000  | -0.870902000 | H | 4.368903000 | -6.704475000 | 0.389640000  |
| C  | -3.358147000 | 1.864370000  | -1.549411000 |   |             |              |              |
| H  | -2.792873000 | -0.139393000 | -1.054414000 |   |             |              |              |
| H  | -1.473580000 | 4.569615000  | -0.806411000 |   |             |              |              |
| H  | -4.301518000 | 1.553370000  | -1.979234000 |   |             |              |              |
| C  | -2.974213000 | 3.200090000  | -1.474478000 |   |             |              |              |
| C  | -3.815619000 | 4.323980000  | -1.995149000 |   |             |              |              |
| O  | -4.937188000 | 3.890371000  | -2.600061000 |   |             |              |              |
| O  | -3.519283000 | 5.495424000  | -1.886965000 |   |             |              |              |
| H  | -5.426693000 | 4.683186000  | -2.889983000 |   |             |              |              |
| C  | 2.787602000  | 5.535963000  | 1.016200000  |   |             |              |              |
| O  | 3.975357000  | 5.560307000  | 1.649207000  |   |             |              |              |
| O  | 2.260870000  | 6.515857000  | 0.533780000  |   |             |              |              |
| H  | 4.304114000  | 6.477667000  | 1.597006000  |   |             |              |              |
| C  | -2.442259000 | -1.358678000 | 1.922568000  |   |             |              |              |
| C  | -1.587362000 | 0.416827000  | 3.160389000  |   |             |              |              |
| C  | -3.543103000 | -1.463693000 | 2.776781000  |   |             |              |              |
| C  | -2.637627000 | 0.351777000  | 4.071973000  |   |             |              |              |
| H  | -0.793348000 | 1.150929000  | 3.260418000  |   |             |              |              |
| H  | -4.345947000 | -2.154701000 | 2.553698000  |   |             |              |              |
| H  | -2.675621000 | 1.043123000  | 4.907074000  |   |             |              |              |
| C  | -0.892341000 | -2.560055000 | -1.158345000 |   |             |              |              |
| C  | -2.234453000 | -2.234173000 | 0.741962000  |   |             |              |              |
| C  | -1.667371000 | -3.654569000 | -1.554367000 |   |             |              |              |
| C  | -3.043896000 | -3.322177000 | 0.403069000  |   |             |              |              |
| H  | -1.448220000 | -4.193644000 | -2.468370000 |   |             |              |              |
| H  | -3.920657000 | -3.569925000 | 0.983666000  |   |             |              |              |
| C  | 0.276695000  | -2.031359000 | -1.903338000 |   |             |              |              |
| C  | 1.956496000  | -0.413535000 | -1.929385000 |   |             |              |              |
| C  | 0.764310000  | -2.595437000 | -3.082468000 |   |             |              |              |
| C  | 2.507543000  | -0.937686000 | -3.101163000 |   |             |              |              |
| H  | 2.421145000  | 0.442245000  | -1.448221000 |   |             |              |              |
| H  | 0.279568000  | -3.459045000 | -3.523226000 |   |             |              |              |
| H  | 3.409366000  | -0.488665000 | -3.499816000 |   |             |              |              |
| C  | 1.893651000  | -2.038569000 | -3.687885000 |   |             |              |              |
| C  | -2.747703000 | -4.029225000 | -0.759601000 |   |             |              |              |
| C  | -3.635886000 | -0.598703000 | 3.863848000  |   |             |              |              |
| H  | 2.287884000  | -2.472534000 | -4.602201000 |   |             |              |              |
| H  | -3.378302000 | -4.860757000 | -1.057154000 |   |             |              |              |
| H  | -4.492154000 | -0.656624000 | 4.528440000  |   |             |              |              |
| Cl | 5.198533000  | 1.043418000  | -0.635144000 |   |             |              |              |
| O  | 5.134326000  | -0.314365000 | -1.272487000 |   |             |              |              |
| O  | 6.458016000  | 1.732758000  | -0.991176000 |   |             |              |              |
| O  | 5.098068000  | 0.886783000  | 0.862356000  |   |             |              |              |
| O  | 4.014628000  | 1.849857000  | -1.112693000 |   |             |              |              |
| Cl | -5.693376000 | -0.964281000 | -0.228125000 |   |             |              |              |
| O  | -7.005932000 | -0.525056000 | -0.754087000 |   |             |              |              |
| O  | -5.063147000 | 0.126391000  | 0.592806000  |   |             |              |              |
| O  | -4.762885000 | -1.293224000 | -1.369631000 |   |             |              |              |
| O  | -5.860198000 | -2.187611000 | 0.633093000  |   |             |              |              |
| C  | 3.114705000  | -4.204932000 | 0.167962000  |   |             |              |              |
| C  | 2.166113000  | -4.457946000 | 1.188950000  |   |             |              |              |
| C  | 1.946351000  | -3.543931000 | 2.197858000  |   |             |              |              |
| C  | 2.639845000  | -2.290525000 | 2.199905000  |   |             |              |              |
| C  | 3.648066000  | -2.071508000 | 1.206591000  |   |             |              |              |
| C  | 3.844564000  | -2.997953000 | 0.200599000  |   |             |              |              |
| H  | 1.618466000  | -5.397805000 | 1.179981000  |   |             |              |              |
| H  | 1.225726000  | -3.749419000 | 2.983926000  |   |             |              |              |
| H  | 2.697209000  | -1.735254000 | 3.129144000  |   |             |              |              |
| H  | 4.227983000  | -1.152997000 | 1.217000000  |   |             |              |              |
| H  | 4.579279000  | -2.780903000 | -0.569450000 |   |             |              |              |
| C  | 3.385033000  | -5.234934000 | -0.901568000 |   |             |              |              |
| H  | 2.487843000  | -5.845353000 | -1.064589000 |   |             |              |              |
| H  | 3.605559000  | -4.727587000 | -1.848743000 |   |             |              |              |
